# Supplementary material for: Exploring regression-based QSTR and i-QSTR modeling for ecotoxicity prediction of diverse pesticides on multiple avian species
Source: Royal Society of Chemistry journal article supplement (doi:10.1039/d3va00163f), 2023-01-01
Supplement: d3va00163f1.xlsx [file d3va00163f1.xlsx]

## Sheet: BQ
SL no	CAS_NO	Name	Canonical Smiles	MW	TOXICITY	pLD50	Unit
1*	72269-48-8*	(E)-4-Tridecenyl acetate *	CCCCCCCCC=CCCCOC(=O)C	240.38	2000	2.07987	mol/kg
2	163515-14-8	(S)-Dimethenamid	CC1=CSC(=C1N(C(C)COC)C(=O)CCl)C	275.8	1068	2.41202	mol/kg
3	61791-64-8	1-(Alkyl* amino)-3-aminopropane diacetate	[H][N+]([H])([H]OC(C)=O)C([H])([H])C([H])([H])C([H])([H])[N+]([H])([*])[H]OC(C)=O	193.229	240	2.90586	mol/kg
4*	2634-33-5*	1,2-Benzisothiazolin-3-one*	C1=CC=C2C(=C1)C(=O)NS2	151.19	617	2.38924	mol/kg
5	4299-07-04	1,2-Benzisothiazolin-3-one, 2-butyl	CCCCN1C(=O)C2=CC=CC=C2S1	207.29	1295	2.20431	mol/kg
6	542-75-6	1,3 Dichloropropene	C(C=CCl)Cl	110.97	152	2.86336	mol/kg
7	288-88-0	1H-1,2,4-Triazole metabolite	C1=NC=NN1	69.07	770	1.9528	mol/kg
8	3100-04-07	1-Methylcyclopropene	CC1=CC1	54.09	2250	1.38093	mol/kg
9	34375-28-5	2-(Hydroxymethyl)amino)ethanol	CN(CCO)O	91.11	1743	1.71827	mol/kg
10	865363-39-9	2,4 DP-p-2-ethylhexyl	CCCCC(CC)COC(=O)C(C)OC1=C(C=C(C=C1)Cl)Cl	347.3	855	2.60874	mol/kg
11	1929-73-3	2,4-D Butoxyethanol Ester	CCCCOCCOC(=O)COC1=C(C=C(C=C1)Cl)Cl	321.2	2000	2.20575	mol/kg
12*	94-11-1*	2,4-D Isopropyl Ester*	CC(C)OC(=O)COC1=C(C=C(C=C1)Cl)Cl	263.11	1879	2.14621	mol/kg
13	120-32-1	2-Benzyl-4-chlorophenol	C1=CC=C(C=C1)CC2=C(C=CC(=C2)Cl)O	218.68	2510	1.94014	mol/kg
14	2491-38-5	2-Bromo-4'-hydroxyacetophenone	C1=CC(=CC=C1C(=O)CBr)O	215.04	662	2.51166	mol/kg
15	3547-33-9	2-Hydroxyethyl octyl sulfide	CCCCCCCCSCCO	190.35	2250	1.92737	mol/kg
16	2527-66-4	2-Methyl-1,2-benzisothiazolin-3-one	CN1C(=O)C2=CC=CC=C2S1	165.21	288	2.75864	mol/kg
17*	85264-33-1*	3,5 Dimethyl-1-(hydroxymethyl)pyrazole*	CC1=CC(=NN1CO)C	126.16	759	2.22068	mol/kg
18	6515-38-4	3,5,6-Trichloro-2-pyridinol degradate	C1=C(C(=O)NC(=C1Cl)Cl)Cl	198.43	2000	1.99658	mol/kg
19	55406-53-6	3-Iodo-2-propynyl butyl carbamate (IPBC)	CCCCNC(=O)OCC#CI	281.09	749	2.57436	mol/kg
20	51200-87-4	4,4-Dimethyloxazolidine	CC1(COCN1)C	101.15	705	2.15678	mol/kg
21	1192-52-5	4,5-Dichloro-1,2-dithio-3-one	C1(=C(SSC1=O)Cl)Cl	187.1	321	2.76557	mol/kg
22*	504-24-5*	4-Aminopyridine*	C1=CN=CC=C1N	94.11	15	3.79754	mol/kg
23*	88-04-0*	4-Chloro-3,5-xylenol *	CC1=CC(=CC(=C1Cl)C)O	156.61	2250	1.84264	mol/kg
24	59-50-7	4-Chloro-3-cresol	CC1=C(C=CC(=C1)O)Cl	142.58	1540	1.96654	mol/kg
25*	71751-41-2*	Abamectin*	CCC(C)C1C(C=CC2(O1)CC3CC(O2)CC=C(C(C(C=CC=C4COC5C4(C(C=C(C5O)C)C(=O)O3)O)C)OC6CC(C(C(O6)C)OC7CC(C(C(O7)C)O)OC)OC)C)C.CC1C=CC=C2COC3C2(C(C=C(C3O)C)C(=O)OC4CC(CC=C(C1OC5CC(C(C(O5)C)OC6CC(C(C(O6)C)O)OC)OC)C)OC7(C4)C=CC(C(O7)C(C)C)C)O	1732.1	2000	2.93754	mol/kg
26	103-90-2	Acetaminophen	CC(=O)NC1=CC=C(C=C1)O	151.16	2250	1.82725	mol/kg
27	34256-82-1	Acetochlor	CCC1=CC=CC(=C1N(COCC)C(=O)CCl)C	269.77	49	3.7408	mol/kg
28	135158-54-2	Acibenzolar-s-methyl	CSC(=O)C1=C2C(=CC=C1)N=NS2	210.3	2000	2.02181	mol/kg
29*	15972-60-8*	Alachlor*	CCC1=C(C(=CC=C1)CC)N(COC)C(=O)CCl	269.77	1536	2.2446	mol/kg
30	67375-30-8	Alpha-cypermethrin	CC1(C(C1C(=O)OC(C#N)C2=CC(=CC=C2)OC3=CC=CC=C3)C=C(Cl)Cl)C	416.3	2025	2.31298	mol/kg
31	865318-97-4	Amectoctradin	CCCCCCCCC1=C(N2C(=NC=N2)N=C1CC)N	275.39	2000	2.13892	mol/kg
32	834-12-8	Ametryn	CCNC1=NC(=NC(=N1)SC)NC(C)C	227.33	2250	2.00447	mol/kg
33	129909-90-6	Amicarbazone	CC(C)C1=NN(C(=O)N1N)C(=O)NC(C)(C)C	241.29	1965	2.08918	mol/kg
34	858956-08-8	Aminocyclopyrachlor	C1CC1C2=NC(=C(C(=N2)N)Cl)C(=O)O	213.62	2075	2.01262	mol/kg
35	858954-83-3	Aminocyclopyrachlor methyl ester	COC(=O)C1=C(C(=NC(=N1)C2CC2)N)Cl	227.65	2045	2.04657	mol/kg
36	150114-71-9	Aminopyralid	C1=C(C(=C(N=C1Cl)C(=O)O)Cl)N	207.01	292	2.85061	mol/kg
37	33089-61-1	Amitraz	CC1=CC(=C(C=C1)N=CN(C)C=NC2=C(C=C(C=C2)C)C)C	293.4	70.6	3.61866	mol/kg
38*	101-05-3*	Anilazine*	C1=CC=C(C(=C1)NC2=NC(=NC(=N2)Cl)Cl)Cl	275.5	2000	2.13909	mol/kg
39	1912-24-9	Atrazine desethylatrazine metabolite	CCNC1=NC(=NC(=N1)Cl)NC(C)C	215.68	768	2.44845	mol/kg
40	108168-76-9	Azadirachtin	CCC(C)C(=O)OC1CC(C2(COC3C2C14COC(C4C(C3O)(C)C56C7CC(C5(O6)C)C8(CCOC8O7)O)(C(=O)OC)O)C(=O)OC)OC(=O)C	724.7	2250	2.50798	mol/kg
41	86-50-0	Azinphos-methyl	COP(=S)(OC)SCN1C(=O)C2=CC=CC=C2N=N1	317.3	33	3.98296	mol/kg
42	131860-33-8	Azoxystrobin	COC=C(C1=CC=CC=C1OC2=NC=NC(=C2)OC3=CC=CC=C3C#N)C(=O)OC	403.4	2000	2.30471	mol/kg
43	1861-40-1	Benfluralin	CCCCN(CC)C1=C(C=C(C=C1[N+](=O)[O-])C(F)(F)F)[N+](=O)[O-]	335.28	2000	2.22438	mol/kg
44*	17804-35-2*	Benomyl metabolite(Carbendazim MBC CAS 10605-21-7)*	CCCCNC(=O)N1C2=CC=CC=C2N=C1NC(=O)OC	290.32	2250	2.11069	mol/kg
45	741-58-2	Bensulide	CC(C)OP(=S)(OC(C)C)SCCNS(=O)(=O)C1=CC=CC=C1	397.5	1386	2.45757	mol/kg
46	120-51-4	Benzyl benzoate	C1=CC=C(C=C1)COC(=O)C2=CC=CC=C2	212.24	2000	2.0258	mol/kg
47	68359-37-5	beta Cyfluthrin	CC1(C(C1C(=O)OC(C#N)C2=CC(=C(C=C2)F)OC3=CC=CC=C3)C=C(Cl)Cl)C	434.3	2000	2.33676	mol/kg
48	352010-68-5	Bicyclopyrone	COCCOCC1=C(C=CC(=N1)C(F)(F)F)C(=C2C(=O)C3CCC(C3)C2=O)O	399.4	1206	2.52006	mol/kg
49	149877-41-8	Bifenazate	CC(C)OC(=O)NNC1=C(C=CC(=C1)C2=CC=CC=C2)OC	300.35	1032	2.46395	mol/kg
50	42576-02-3	Bifenox	COC(=O)C1=C(C=CC(=C1)OC2=C(C=C(C=C2)Cl)Cl)[N+](=O)[O-]	342.1	2150	2.20171	mol/kg
51	37069-54-8	Blankophor BHC	C1=CC=C(C=C1)C2=NN(N=C2)C3=CC(=C(C=C3)C=CC4=C(C=C(C=C4)N5N=CC(=N5)C6=CC=CC=C6)S(=O)(=O)O)S(=O)(=O)O	626.7	3100	2.3057	mol/kg
52	188425-85-6	Boscalid	C1=CC=C(C(=C1)C2=CC=C(C=C2)Cl)NC(=O)C3=C(N=CC=C3)Cl	343.2	2000	2.23452	mol/kg
53	314-40-9	Bromacil	CCC(C)N1C(=O)C(=C(NC1=O)C)Br	261.12	2250	2.06466	mol/kg
54	63333-35-7	Bromethalin with polyethylene glycol	CN(C1=C(C=C(C=C1[N+](=O)[O-])[N+](=O)[O-])C(F)(F)F)C2=C(C=C(C=C2Br)Br)Br	577.93	4.6	5.09912	mol/kg
55	56634-95-8	Bromoxynil heptanoate	CCCCCCC(=O)OC1=C(C=C(C=C1Br)C#N)Br	389.08	359	3.03494	mol/kg
56*	69327-76-0*	Buprofezin*	CC(C)N1C(=NC(C)(C)C)SCN(C1=O)C2=CC=CC=C2	305.4	2000	2.18384	mol/kg
57	134605-64-4	Butafenacil	CC(C)(C(=O)OCC=C)OC(=O)C1=C(C=CC(=C1)N2C(=O)C=C(N(C2=O)C)C(F)(F)F)Cl	474.8	2250	2.32433	mol/kg
58	9003-13-8	Butoxypolypropylene glycol	CCCCOCC(C)OCC(C)O	190.28	2250	1.92721	mol/kg
59*	33629-47-9*	Butralin*	CCC(C)NC1=C(C=C(C=C1[N+](=O)[O-])C(C)(C)C)[N+](=O)[O-]	295.33	2250	2.11813	mol/kg
60	81510-83-0	Calcium tetrathiocarbamate	CC(C)C1(C(=O)NC(=N1)C2=C(C=CC=N2)C(=O)O)C.CC(C)N	320.39	1180	2.4338	mol/kg
61	2939-80-2	Captafol	C1C=CCC2C1C(=O)N(C2=O)SC(C(Cl)Cl)(Cl)Cl	349.1	2510	2.14328	mol/kg
62	133-06-2	Captan	C1C=CCC2C1C(=O)N(C2=O)SC(Cl)(Cl)Cl	300.6	2150	2.14555	mol/kg
63	10605-21-7	Carbendazim	COC(=O)NC1=NC2=CC=CC=C2N1	191.19	2100	1.95925	mol/kg
64	5234-68-4	Carboxin	CC1=C(SCCO1)C(=O)NC2=CC=CC=C2	235.3	2150	2.03918	mol/kg
65	128639-02-1	Carfentrazone-ethyl	CCOC(=O)C(CC1=CC(=C(C=C1Cl)F)N2C(=O)N(C(=N2)C)C(F)F)Cl	412.2	2250	2.26293	mol/kg
66	54593-83-8	Chlorethoxyfos	CCOP(=S)(OCC)OC(C(Cl)(Cl)Cl)Cl	336	27.6	4.08543	mol/kg
67	56-95-1	Chlorhexidine diacetate	CC(=O)O.CC(=O)O.C1=CC(=CC=C1NC(=NC(=NCCCCCCN=C(N)N=C(N)NC2=CC=C(C=C2)Cl)N)N)Cl	625.5	2013	2.49238	mol/kg
68*	510-15-6*	Chlorobenzilate*	CCOC(=O)C(C1=CC=C(C=C1)Cl)(C2=CC=C(C=C2)Cl)O	325.2	607	2.72896	mol/kg
69	3691-35-8	Chlorophacinone	C1=CC=C(C=C1)C(C2=CC=C(C=C2)Cl)C(=O)C3C(=O)C4=CC=CC=C4C3=O	374.8	495	2.87919	mol/kg
70	101-10-0	Chloroprop acid	CC(C(=O)O)OC1=CC(=CC=C1)Cl	200.62	1316	2.18312	mol/kg
71	2921-88-2	Chlorpyrifos oxon	CCOP(=S)(OCC)OC1=NC(=C(C=C1Cl)Cl)Cl	350.6	8.8	4.60033	mol/kg
72	64902-72-3	Chlorsulfuron	CC1=NC(=NC(=N1)OC)NC(=O)NS(=O)(=O)C2=CC=CC=C2Cl	357.77	5000	1.85463	mol/kg
73*	1861-32-1*	Chlorthal dimethyl *	COC(=O)C1=C(C(=C(C(=C1Cl)Cl)C(=O)OC)Cl)Cl	332	2250	2.16896	mol/kg
74	8000-29-1	Citronella Oil	CC(CCC=C(C)C)CC=O	154.25	2250	1.83604	mol/kg
75	99129-21-2	Clethodim	CCC(=NOCC=CCl)C1=C(CC(CC1=O)CC(C)SCC)O	359.9	2000	2.25515	mol/kg
76*	105512-06-9*	Clodinafop-propargyl*	CC(C(=O)OCC#C)OC1=CC=C(C=C1)OC2=C(C=C(C=N2)Cl)F	349.7	1455	2.38083	mol/kg
77	74115-24-5	Clofentezine	C1=CC=C(C(=C1)C2=NN=C(N=N2)C3=CC=CC=C3Cl)Cl	303.1	7500	1.60652	mol/kg
78	81777-89-1	Clomazone	CC1(CON(C1=O)CC2=CC=CC=C2Cl)C	239.7	2510	1.97999	mol/kg
79*	99607-70-2*	Cloquintocet-mexyl*	CCCCCC(C)OC(=O)COC1=C2C(=C(C=C1)Cl)C=CC=N2	335.8	2000	2.22505	mol/kg
80	210880-92-5	Clothianidin	CNC(=N[N+](=O)[O-])NCC1=CN=C(S1)Cl	249.68	2000	2.09635	mol/kg
81	56-72-4	Coumaphos	CCOP(=S)(OCC)OC1=CC2=C(C=C1)C(=C(C(=O)O2)Cl)C	362.8	2.36	5.18676	mol/kg
82	3572-06-03	Cue Lure 2-Butanone,4-(4(acetyloxy)phenyl)acetate	CC(=O)CCC1=CC=C(C=C1)OC(=O)C	206.24	2250	1.96219	mol/kg
83	736994-63-1	Cyantraniliprole	CC1=CC(=CC(=C1NC(=O)C2=CC(=NN2C3=C(C=CC=N3)Cl)Br)C(=O)NC)C#N	473.7	2250	2.32332	mol/kg
84	1134-23-2	Cycloate	CCN(C1CCCCC1)C(=O)SCC	215.36	2150	2.00073	mol/kg
85*	180409-60-3*	Cyflufenamid*	C1CC1CON=C(C2=C(C=CC(=C2F)F)C(F)(F)F)NC(=O)CC3=CC=CC=C3	412.4	1950	2.32528	mol/kg
86	400882-07-7	Cyflumetofen	CC(C)(C)C1=CC=C(C=C1)C(C#N)(C(=O)C2=CC=CC=C2C(F)(F)F)C(=O)OCCOC	447.4	2000	2.34967	mol/kg
87*	122008-85-9*	Cyhalofop-butyl*	CCCCOC(=O)C(C)OC1=CC=C(C=C1)OC2=C(C=C(C=C2)C#N)F	357.4	2250	2.20097	mol/kg
88	57966-95-7	Cymoxanil	CCNC(=O)NC(=O)C(=NOC)C#N	198.18	2250	1.94488	mol/kg
89*	52315-07-8*	Cypermethrin Beta*	CC1(C(C1C(=O)OC(C#N)C2=CC(=CC=C2)OC3=CC=CC=C3)C=C(Cl)Cl)C	416.3	2000	2.31838	mol/kg
90*	94361-06-5*	Cyproconazole*	CC(C1CC1)C(CN2C=NC=N2)(C3=CC=C(C=C3)Cl)O	291.77	150	3.28895	mol/kg
91	121552-61-2	Cyprodinil	CC1=CC(=NC(=N1)NC2=CC=CC=C2)C3CC3	225.29	2000	2.05171	mol/kg
92	66215-27-8	Cyromazine	C1CC1NC2=NC(=NC(=N2)N)N	166.18	1785	1.96894	mol/kg
93	525-79-1	Cytokinin	C1=COC(=C1)CNC2=NC=NC3=C2NC=N3	215.21	2510	1.93319	mol/kg
94	10222-01-2	DBNPA	C(#N)C(C(=O)N)(Br)Br	241.87	354	2.83458	mol/kg
95	52918-63-5	Deltamethrin	CC1(C(C1C(=O)OC(C#N)C2=CC(=CC=C2)OC3=CC=CC=C3)C=C(Br)Br)C	505.2	2250	2.35128	mol/kg
96	3734-33-6	Denatonium benzoate	CC[N+](CC)(CC1=CC=CC=C1)CC(=O)NC2=C(C=CC=C2C)C.C1=CC=C(C=C1)C(=O)[O-]	446.6	196	3.35766	mol/kg
97	13684-56-5	Desmedipham	CCOC(=O)NC1=CC(=CC=C1)OC(=O)NC2=CC=CC=C2	300.31	2480	2.08312	mol/kg
98*	333-41-5*	Diazinon*	CCOP(=S)(OCC)OC1=NC(=NC(=C1)C)C(C)C	304.35	8	4.58028	mol/kg
99	962-58-3	Diazinon oxon (metabolite of diazinon)	CCOP(=O)(OCC)OC1=NC(=NC(=C1)C)C(C)C	288.28	5	4.76084	mol/kg
100	78491-02-8	Diazolidinyl Urea	C(NC(=O)N(CO)C1C(=O)N(C(=O)N1CO)CO)O	278.22	2250	2.09221	mol/kg
101	1918-00-9	Dicamba	COC1=C(C=CC(=C1C(=O)O)Cl)Cl	221.03	216	3.01	mol/kg
102	37764-25-3	Dichlormid	C=CCN(CC=C)C(=O)C(Cl)Cl	208.08	1545	2.1293	mol/kg
103	118-52-5	Dichlorodimethylhydantoin	CC1(C(=O)N(C(=O)N1Cl)Cl)C	197.02	1715	2.06025	mol/kg
104*	104786-87-0*	Dichlorprop*	CC(C(=O)O)OC1=C(C=C(C=C1)Cl)Cl.CNC	280.14	279	3.00177	mol/kg
105	62-73-7	Dichlorvos	COP(=O)(OC)OC=C(Cl)Cl	220.97	8.8	4.39985	mol/kg
106	51338-27-3	Diclofop-methyl	CC(C(=O)OC)OC1=CC=C(C=C1)OC2=C(C=C(C=C2)Cl)Cl	341.2	4400	1.88956	mol/kg
107*	99-30-9*	Dicloran*	C1=C(C=C(C(=C1Cl)N)Cl)[N+](=O)[O-]	207.01	900	2.36175	mol/kg
108*	145701-21-9*	Diclosulam*	CCOC1=NC(=CC2=NC(=NN21)S(=O)(=O)NC3=C(C=CC=C3Cl)Cl)F	406.2	2250	2.25656	mol/kg
109	2227-17-0	Dienochlor	C1(=C(C(C(=C1Cl)Cl)(C2(C(=C(C(=C2Cl)Cl)Cl)Cl)Cl)Cl)Cl)Cl	474.6	705	2.82814	mol/kg
110	134-62-3	Diethyl toluamide	CCN(CC)C(=O)C1=CC=CC(=C1)C	191.27	1375	2.14334	mol/kg
111	111-46-6	Diethylene glycol	C(COCCO)O	106.12	2250	1.67361	mol/kg
112	35367-38-5	Diflubenzuron	C1=CC(=C(C(=C1)F)C(=O)NC(=O)NC2=CC=C(C=C2)Cl)F	310.68	5000	1.79334	mol/kg
113*	20018-09-1*	Diiodomethyl p-tolyl sulfone*	CC1=CC=C(C=C1)S(=O)(=O)C(I)I	422.02	2510	2.22566	mol/kg
114	60-51-5	Dimethoate	CNC(=O)CSP(=S)(OC)OC	229.3	11.7	4.29222	mol/kg
115	828-00-2	Dimethoxane	CC1CC(OC(O1)C)OC(=O)C	174.19	1585	2.04099	mol/kg
116	68-12-2	Dimethylformamide	CN(C)C=O	73.09	460	2.2011	mol/kg
117	39300-45-3	Dinocap	CCCCCCC(C)C1=C(C(=CC(=C1)[N+](=O)[O-])[N+](=O)[O-])OC(=O)C=CC	364.4	2150	2.22914	mol/kg
118*	88-85-7*	Dinoseb acid*	CCC(C)C1=C(C(=CC(=C1)[N+](=O)[O-])[N+](=O)[O-])O	240.21	40	3.77853	mol/kg
119	165252-70-0	Dinotefuran	CN=C(NCC1CCOC1)N[N+](=O)O	203.22	2250	1.95578	mol/kg
120	122-39-4	Diphenylamine	C1=CC=C(C=C1)NC2=CC=CC=C2	169.22	2250	1.87627	mol/kg
121	136-45-8	Dipropyl isocinchomeronate	CCCOC(=O)C1=CN=C(C=C1)C(=O)OCCC	251.28	1350	2.26982	mol/kg
122	298-04-4	Disulfoton sulfoxide degradate	CCOP(=S)(OCC)SCCSCC	274.4	9.2	4.4746	mol/kg
123	97886-45-8	Dithiopyr	CC(C)CC1=C(C(=NC(=C1C(=O)SC)C(F)(F)F)C(F)F)C(=O)SC	401.4	2250	2.25139	mol/kg
124	2439-10-03	Dodine	CCCCCCCCCCCCN=C(N)N.CC(=O)O	287.44	690	2.6197	mol/kg
125*	26002-80-2*	D-Phenothrin *	CC(=CC1C(C1(C)C)C(=O)OCC2=CC(=CC=C2)OC3=CC=CC=C3)C	350.4	2510	2.14489	mol/kg
126	115-29-7	Endosulfan	C1C2C(COS(=O)O1)C3(C(=C(C2(C3(Cl)Cl)Cl)Cl)Cl)Cl	406.9	42	3.98624	mol/kg
127	1031-07-8	Endosulfan sulfate metabolite(PC Code 079404)	C1C2C(COS(=O)(=O)O1)C3(C(=C(C2(C3(Cl)Cl)Cl)Cl)Cl)Cl	422.9	44	3.98279	mol/kg
128	145-73-3	Endothall	C1CC2C(C(C1O2)C(=O)O)C(=O)O	186.16	500	2.57092	mol/kg
129	2650-18-2	Erioglaucine/Tartrazine mixture- Aquashade	CCN(CC1=CC(=CC=C1)S(=O)(=O)[O-])C2=CC=C(C=C2)C(=C3C=CC(=[N+](CC)CC4=CC(=CC=C4)S(=O)(=O)[O-])C=C3)C5=CC=CC=C5S(=O)(=O)[O-].[NH4+].[NH4+]	783	2250	2.54158	mol/kg
130	66230-04-4	Esfenvalerate	CC(C)C(C1=CC=C(C=C1)Cl)C(=O)OC(C#N)C2=CC(=CC=C2)OC3=CC=CC=C3	419.9	382	3.04108	mol/kg
131	162650-77-3	Ethaboxam	CCC1=C(SC(=N1)NCC)C(=O)NC(C#N)C2=CC=CS2	320.4	2000	2.20466	mol/kg
132	55283-68-6	Ethalfluralin	CCN(CC(=C)C)C1=C(C=C(C=C1[N+](=O)[O-])C(F)(F)F)[N+](=O)[O-]	333.26	2000	2.22175	mol/kg
133	97780-06-8	Ethametsulfuron methyl	CCOC1=NC(=NC(=N1)NC(=O)NS(=O)(=O)C2=CC=CC=C2C(=O)OC)NC	410.4	2250	2.26102	mol/kg
134	16672-87-0	Ethephon	C(CCl)P(=O)(O)O	144.49	1072	2.12964	mol/kg
135	563-12-2	Ethion	CCOP(=S)(OCC)SCSP(=S)(OCC)OCC	384.5	127.8	3.47837	mol/kg
136	759-94-4	Ethyl dipropylthiocarbamate	CCCN(CCC)C(=O)SCC	189.32	2510	1.87752	mol/kg
137*	96-45-7*	Ethylenethiourea*	C1CNC(=S)N1	102.16	2250	1.6571	mol/kg
138	131807-57-3	Famoxadone	CC1(C(=O)N(C(=O)O1)NC2=CC=CC=C2)C3=CC=C(C=C3)OC4=CC=CC=C4	374.4	2250	2.22115	mol/kg
139*	161326-34-7*	Fenamidone*	CC1(C(=O)N(C(=N1)SC)NC2=CC=CC=C2)C3=CC=CC=C3	311.4	2000	2.19229	mol/kg
140*	22224-92-6*	Fenamiphos*	CCOP(=O)(NC(C)C)OC1=CC(=C(C=C1)SC)C	303.36	1.6	5.27784	mol/kg
141*	60168-88-9*	Fenarimol*	C1=CC=C(C(=C1)C(C2=CC=C(C=C2)Cl)(C3=CN=CN=C3)O)Cl	331.2	2000	2.21906	mol/kg
142	126833-17-8	Fenhexamid	CC1(CCCCC1)C(=O)NC2=C(C(=C(C=C2)O)Cl)Cl	302.2	2000	2.17926	mol/kg
143	122-14-5	Fenitrothion	CC1=C(C=CC(=C1)OP(=S)(OC)OC)[N+](=O)[O-]	277.24	23.6	4.06994	mol/kg
144	66441-23-4	Fenoxaprop-ethyl	CCOC(=O)C(C)OC1=CC=C(C=C1)OC2=NC3=C(O2)C=C(C=C3)Cl	361.8	2510	2.15879	mol/kg
145	72490-01-8	Fenoxycarb	CCOC(=O)NCCOC1=CC=C(C=C1)OC2=CC=CC=C2	301.34	7000	1.63396	mol/kg
146	71283-80-2	Fenoxyprop-p-ethyl	CCOC(=O)C(C)OC1=CC=C(C=C1)OC2=NC3=C(O2)C=C(C=C3)Cl	361.8	2000	2.25744	mol/kg
147*	67564-91-4*	Fenpropimorph*	CC1CN(CC(O1)C)CC(C)CC2=CC=C(C=C2)C(C)(C)C	303.5	2000	2.18113	mol/kg
148*	473798-59-3*	Fenpyrazamine*	CC1=CC=CC=C1C2=C(N(N(C2=O)C(C)C)C(=O)SCC=C)N	331.4	2000	2.21932	mol/kg
149	134098-61-6	Fenpyroximate	CC1=NN(C(=C1C=NOCC2=CC=C(C=C2)C(=O)OC(C)(C)C)OC3=CC=CC=C3)C	421.5	2000	2.32377	mol/kg
150	55-38-9	Fenthion	CC1=C(C=CC(=C1)OP(=S)(OC)OC)SC	278.3	7.1	4.59325	mol/kg
151*	51630-58-1*	Fenvalerate*	CC(C)C(C1=CC=C(C=C1)Cl)C(=O)OC(C#N)C2=CC(=CC=C2)OC3=CC=CC=C3	419.9	2000	2.32212	mol/kg
152	120068-37-3	Fipronil MB 46136 metabolite	C1=C(C=C(C(=C1Cl)N2C(=C(C(=N2)C#N)S(=O)C(F)(F)F)N)Cl)C(F)(F)F	437.1	2000	2.33955	mol/kg
153	104040-78-0	Flazasulfuron	COC1=CC(=NC(=N1)NC(=O)NS(=O)(=O)C2=C(C=CC=N2)C(F)(F)F)OC	407.33	2000	2.30892	mol/kg
154	158062-67-0	Flonicamid	C1=CN=CC(=C1C(F)(F)F)C(=O)NCC#N	229.16	2000	2.05911	mol/kg
155	79622-59-6	Fluazinam	C1=C(C=NC(=C1Cl)NC2=C(C=C(C(=C2[N+](=O)[O-])Cl)C(F)(F)F)[N+](=O)[O-])C(F)(F)F	465.09	1782	2.41663	mol/kg
156*	272451-65-7*	Flubendiamide*	CC1=C(C=CC(=C1)C(C(F)(F)F)(C(F)(F)F)F)NC(=O)C2=C(C(=CC=C2)I)C(=O)NC(C)(C)CS(=O)(=O)C	682.4	2000	2.53301	mol/kg
157*	33245-39-5*	Fluchloralin*	CCCN(CCCl)C1=C(C=C(C=C1[N+](=O)[O-])C(F)(F)F)[N+](=O)[O-]	355.7	7000	1.70599	mol/kg
158	70124-77-5	Flucythrinate	CC(C)C(C1=CC=C(C=C1)OC(F)F)C(=O)OC(C#N)C2=CC(=CC=C2)OC3=CC=CC=C3	451.5	2780	2.21061	mol/kg
159	131341-86-1	Fludioxonil	C1=CC(=C2C(=C1)OC(O2)(F)F)C3=CNC=C3C#N	248.18	2000	2.09374	mol/kg
160	318290-98-1	Fluensulfone	C1=C(SC(=N1)S(=O)(=O)CCC(=C(F)F)F)Cl	291.7	988	2.47018	mol/kg
161	188489-07-8	Flufenpyr-ethyl	CCOC(=O)COC1=C(C=C(C(=C1)N2C(=O)C(=C(C=N2)C(F)(F)F)C)F)Cl	408.73	2250	2.25925	mol/kg
162	98967-40-9	Flumetsulam	CC1=NC2=NC(=NN2C=C1)S(=O)(=O)NC3=C(C=CC=C3F)F	325.3	2250	2.1601	mol/kg
163*	87546-18-7*	Flumiclorac*	CCCCCOC(=O)COC1=C(C=C(C(=C1)N2C(=O)C3=C(C2=O)CCCC3)F)Cl	423.9	2250	2.27508	mol/kg
164	103361-09-7	Flumioxazin	C#CCN1C(=O)COC2=CC(=C(C=C21)N3C(=O)C4=C(C3=O)CCCC4)F	354.3	2250	2.19719	mol/kg
165	239110-15-7	Fluopicolide	C1=CC(=C(C(=C1)Cl)C(=O)NCC2=C(C=C(C=N2)C(F)(F)F)Cl)Cl	383.6	2250	2.2317	mol/kg
166*	658066-35-4*	Fluopyram*	C1=CC=C(C(=C1)C(=O)NCCC2=C(C=C(C=N2)C(F)(F)F)Cl)C(F)(F)F	396.71	2000	2.29744	mol/kg
167	361377-29-9	Fluoxastrobin	CON=C(C1=CC=CC=C1OC2=C(C(=NC=N2)OC3=CC=CC=C3Cl)F)C4=NOCCO4	458.8	2000	2.36059	mol/kg
168	951659-40-8	Flupyradifurone	C1C(=CC(=O)O1)N(CC2=CN=C(C=C2)Cl)CC(F)F	288.68	232	3.09493	mol/kg
169	59756-60-4	Fluridone	CN1C=C(C(=O)C(=C1)C2=CC(=CC=C2)C(F)(F)F)C3=CC=CC=C3	329.3	2000	2.21656	mol/kg
170	69377-81-7	Fluroxypyr	C(C(=O)O)OC1=NC(=C(C(=C1Cl)N)Cl)F	255.03	2000	2.10556	mol/kg
171	81406-37-3	Fluroxypyr 1-methylheptyl ester	CCCCCCC(C)OC(=O)COC1=NC(=C(C(=C1Cl)N)Cl)F	367.2	2000	2.26387	mol/kg
172	56425-91-3	Flurprimidol	CC(C)C(C1=CC=C(C=C1)OC(F)(F)F)(C2=CN=CN=C2)O	312.29	2000	2.19353	mol/kg
173	66332-96-5	Flutolanil	CC(C)OC1=CC=CC(=C1)NC(=O)C2=CC=CC=C2C(F)(F)F	323.31	2000	2.20859	mol/kg
174	76674-21-0	Flutriafol	C1=CC=C(C(=C1)C(CN2C=NC=N2)(C3=CC=C(C=C3)F)O)F	301.29	810	2.5705	mol/kg
175	69409-94-5	Fluvalinate	CC(C)C(C(=O)OC(C#N)C1=CC(=CC=C1)OC2=CC=CC=C2)NC3=C(C=C(C=C3)C(F)(F)F)Cl	502.9	2510	2.30181	mol/kg
176	907204-31-3	Fluxapyroxad	CN1C=C(C(=N1)C(F)F)C(=O)NC2=CC=CC=C2C3=CC(=C(C(=C3)F)F)F	381.3	2000	2.28024	mol/kg
177	133-07-3	Folpet	C1=CC=C2C(=C1)C(=O)N(C2=O)SC(Cl)(Cl)Cl	296.6	52	3.75617	mol/kg
178	173159-57-4	Foramsulfuron	CN(C)C(=O)C1=C(C=C(C=C1)NC=O)S(=O)(=O)NC(=O)NC2=NC(=CC(=N2)OC)OC	452.4	2000	2.35449	mol/kg
179	68157-60-8	Forchlorfenuron	C1=CC=C(C=C1)NC(=O)NC2=CC(=NC=C2)Cl	247.68	2250	2.04171	mol/kg
180*	98886-44-3*	Fosthiazate*	CCC(C)SP(=O)(N1CCSC1=O)OCC	283.4	10.6	4.42709	mol/kg
181*	98-01-1*	Furfural*	C1=COC(=C1)C=O	96.08	85	3.05321	mol/kg
182*	76703-62-3*	Gamma cyhalothrin*	CC1(C(C1C(=O)OC(C#N)C2=CC(=CC=C2)OC3=CC=CC=C3)C=C(C(F)(F)F)Cl)C	449.8	2000	2.35199	mol/kg
183	77-06-5	Gibberellic acid	CC12C(C=CC3(C1C(C45C3CCC(C4)(C(=C)C5)O)C(=O)O)OC2=O)O	346.4	2250	2.1874	mol/kg
184	77182-82-2	Glufosinate-ammonium	CP(=O)(CCC(C(=O)O)N)O.N	198.16	2000	1.99599	mol/kg
185	1071-83-6	Glyphosate	C(C(=O)O)NCP(=O)(O)O	169.07	2000	1.92704	mol/kg
186*	4/4/4719*	Grotan*	C1N(CN(CN1CCO)CCO)CCO	219.28	1520	2.15916	mol/kg
187	943831-98-9	Halauxifen methyl	COC1=C(C=CC(=C1F)C2=NC(=C(C(=C2)N)Cl)C(=O)OC)Cl	345.1	2250	2.18576	mol/kg
188	14433-76-2	Hallcomid	CCCCCCCCCC(=O)N(C)C	199.33	1600	2.09545	mol/kg
189*	112226-61-6*	Halofenozide*	CC(C)(C)N(C(=O)C1=CC=CC=C1)NC(=O)C2=CC=C(C=C2)Cl	330.8	2250	2.16738	mol/kg
190	100784-20-1	Halosulfuron methyl	CN1C(=C(C(=N1)Cl)C(=O)OC)S(=O)(=O)NC(=O)NC2=NC(=CC(=N2)OC)OC	434.81	2250	2.28612	mol/kg
191	53042-79-8	(Z,E)-7,11-Hexadecadien-1-yl acetate	CCCCC=CCCC=CCCCCCCOC(=O)C	280.4	2000	2.14675	mol/kg
192	86479-06-3	Hexaflumuron	C1=CC(=C(C(=C1)F)C(=O)NC(=O)NC2=CC(=C(C(=C2)Cl)OC(C(F)F)(F)F)Cl)F	461.1	2000	2.36277	mol/kg
193	51235-04-2	Hexazinone	CN1C(=NC(=O)N(C1=O)C2CCCCC2)N(C)C	252.31	2251	2.04956	mol/kg
194*	67485-29-4*	Hydramethylnon*	CC1(CNC(=NC1)NN=C(C=CC2=CC=C(C=C2)C(F)(F)F)C=CC3=CC=C(C=C3)C(F)(F)F)C	494.5	1828	2.43219	mol/kg
195	81405-85-8	Imazamethabenz	CC1=CC(=C(C=C1)C(=O)OC)C2=NC(C(=O)N2)(C)C(C)C	288.34	2150	2.12747	mol/kg
196*	114311-32-9*	Imazamox*	CC(C)C1(C(=O)NC(=N1)C2=C(C=C(C=N2)COC)C(=O)O)C	305.33	1846	2.21854	mol/kg
197*	122548-33-8*	Imazosulfuron*	COC1=CC(=NC(=N1)NC(=O)NS(=O)(=O)C2=C(N=C3N2C=CC=C3)Cl)OC	412.8	2250	2.26356	mol/kg
198	138261-41-3	Imidacloprid	C1CN(C(=N[N+](=O)[O-])N1)CC2=CN=C(C=C2)Cl	255.66	152.3	3.22496	mol/kg
199	72963-72-5	Imiprothrin	CC(=CC1C(C1(C)C)C(=O)OCN2C(=O)CN(C2=O)CC#C)C	318.4	2250	2.15079	mol/kg
200	950782-86-2	Indaziflam	CC1CC2=C(C1NC3=NC(=NC(=N3)N)C(C)F)C=C(C=C2)C	301.36	2000	2.17806	mol/kg
201*	133-32-4*	Indole-3-butyric acid*	C1=CC=C2C(=C1)C(=CN2)CCCC(=O)O	203.24	2150	1.97557	mol/kg
202*	173584-44-6*	Indoxacarb IN-JT333-20 Degradate*	COC(=O)C12CC3=C(C1=NN(CO2)C(=O)N(C4=CC=C(C=C4)OC(F)(F)F)C(=O)OC)C=CC(=C3)Cl	527.8	1618	2.51349	mol/kg
203	7553-56-2	Iodine	II	253.809	2000	2.10348	mol/kg
204	74-88-4	Iodomethane	CI	141.939	57	3.39623	mol/kg
205	125225-28-7	Ipconazole	CC(C)C1CCC(C1(CN2C=NC=N2)O)CC3=CC=C(C=C3)Cl	333.9	962	2.54044	mol/kg
206	36734-19-7	Iprodione	CC(C)NC(=O)N1CC(=O)N(C1=O)C2=CC(=CC(=C2)Cl)Cl	330.16	930	2.55024	mol/kg
207	28159-98-0	Irgarol	CC(C)(C)NC1=NC(=NC(=N1)NC2CC2)SC	253.37	2250	2.05157	mol/kg
208	42509-83-1	Isazophos methyl	CC(C)N1C(=NC(=N1)OP(=S)(OC)OC)Cl	285.69	11.1	4.41057	mol/kg
209*	25311-71-1*	Isofenphos*	CCOP(=S)(NC(C)C)OC1=CC=CC=C1C(=O)OC(C)C	345.4	8.7	4.5988	mol/kg
210*	33956-49-9*	Isomate C Sex Pheromone*	CC=CC=CCCCCCCCO	182.3	2150	1.92835	mol/kg
211	28079-04-1	Isomate-M	CCCC=CCCCCCCCOC(=O)C	226.35	2000	2.05375	mol/kg
212	33820-53-0	Isopropalin	CCCN(CCC)C1=C(C=C(C=C1[N+](=O)[O-])C(C)C)[N+](=O)[O-]	309.36	2000	2.18943	mol/kg
213*	82558-50-7*	Isoxaben*	CCC(C)(CC)C1=NOC(=C1)NC(=O)C2=C(C=CC=C2OC)OC	332.4	2000	2.22063	mol/kg
214	141112-29-0	Isoxaflutole	CS(=O)(=O)C1=C(C=CC(=C1)C(F)(F)F)C(=O)C2=C(ON=C2)C3CC3	359.3	2150	2.22302	mol/kg
215	143390-89-0	Kresoxim-methyl	CC1=CC=CC=C1OCC2=CC=CC=C2C(=NOC)C(=O)OC	313.3	2150	2.16352	mol/kg
216*	77501-63-4*	Lactofen*	CCOC(=O)C(C)OC(=O)C1=C(C=CC(=C1)OC2=C(C=C(C=C2)C(F)(F)F)Cl)[N+](=O)[O-]	461.8	2510	2.26478	mol/kg
217	103055-07-8	Lufenuron	C1=CC(=C(C(=C1)F)C(=O)NC(=O)NC2=CC(=C(C=C2Cl)OC(C(C(F)(F)F)F)(F)F)Cl)F	511.1	2000	2.40748	mol/kg
218	121-75-5	Malathion malaoxon degradate (PC 657701)	CCOC(=O)CC(C(=O)OCC)SP(=S)(OC)OC	330.4	42.6	3.88963	mol/kg
219	173662-97-0	Mandestrobin	CC1=CC(=C(C=C1)C)OCC2=CC=CC=C2C(C(=O)NC)OC	313.4	2250	2.14392	mol/kg
220	374726-62-2	Mandipropamid	COC1=C(C=CC(=C1)CCNC(=O)C(C2=CC=C(C=C2)Cl)OCC#C)OCC#C	411.9	2250	2.26261	mol/kg
221*	94-74-6*	MCPA*	CC1=C(C=CC(=C1)Cl)OCC(=O)O	200.62	377	2.72603	mol/kg
222	26544-20-7	MCPA isooctyl ester	CC1=C(C=CC(=C1)Cl)OCC(=O)OCCCCCC(C)C	312.8	2250	2.14308	mol/kg
223	16484-77-8	Mecoprop-P	CC1=C(C=CC(=C1)Cl)OC(C)C(=O)O	214.64	546	2.59452	mol/kg
224	70630-17-0	Mefenoxam	CC1=C(C(=CC=C1)C)N(C(C)C(=O)OC)C(=O)COC	279.33	981	2.45445	mol/kg
225	53780-34-0	Mefluidide	CC1=CC(=C(C=C1NC(=O)C)NS(=O)(=O)C(F)(F)F)C	310.29	2000	2.19074	mol/kg
226	208465-21-8	Mesosulfuron methyl	COC1=CC(=NC(=N1)NC(=O)NS(=O)(=O)C2=C(C=CC(=C2)CNS(=O)(=O)C)C(=O)OC)OC	503.5	2000	2.40097	mol/kg
227	104206-82-8	Mesotrione	CS(=O)(=O)C1=CC(=C(C=C1)C(=O)C2C(=O)CCCC2=O)[N+](=O)[O-]	339.32	2000	2.22958	mol/kg
228	139968-49-3	Metaflumizone	C1=CC(=CC(=C1)C(F)(F)F)C(=NNC(=O)NC2=CC=C(C=C2)OC(F)(F)F)CC3=CC=C(C=C3)C#N	506.4	2025	2.39807	mol/kg
229	125116-23-6	Metconazole cis	CC1(CCC(C1(CN2C=NC=N2)O)CC3=CC=C(C=C3)Cl)C	319.8	839	2.58112	mol/kg
230	10265-92-6	Methamidophos	COP(=O)(N)SC	141.13	10.1	4.1453	mol/kg
231*	20354-26-1*	Methazole*	CN1C(=O)N(OC1=O)C2=CC(=C(C=C2)Cl)Cl	261.06	2838	1.96373	mol/kg
232*	161050-58-4*	Methoxyfenozide*	CC1=CC(=CC(=C1)C(=O)N(C(C)(C)C)NC(=O)C2=C(C(=CC=C2)OC)C)C	368.5	2250	2.21425	mol/kg
233	134-20-3	Methyl anthralinate	COC(=O)C1=CC=CC=C1N	151.16	2036	1.87066	mol/kg
234	74-83-9	Methyl bromide	CBr	94.94	73.2	3.11294	mol/kg
235*	71-55-6*	Methyl chloroform*	CC(Cl)(Cl)Cl	133.4	2510	1.72548	mol/kg
236*	112-12-9*	Methyl nonyl ketone*	CCCCCCCCCC(=O)C	170.29	2250	1.87901	mol/kg
237	298-00-0	Methyl parathion	COP(=S)(OC)OC1=CC=C(C=C1)[N+](=O)[O-]	263.21	7.56	4.54178	mol/kg
238	240494-70-6	Metofluthrin	CC=CC1C(C1(C)C)C(=O)OCC2=C(C(=C(C(=C2F)F)COC)F)F	360.3	2250	2.20448	mol/kg
239	220899-03-6	Metrafenone	CC1=CC(=C(C(=C1C(=O)C2=C(C=CC(=C2C)Br)OC)OC)OC)OC	409.3	2025	2.30562	mol/kg
240	21087-64-9	Metribuzin	CC(C)(C)C1=NN=C(N(C1=O)N)SC	214.29	500	2.63203	mol/kg
241	51596-11-3	Milbemectin (Milbemycin A4 + Milbemycin A3)	CCC1C(CCC2(O1)CC3CC(O2)CC=C(CC(C=CC=C4COC5C4(C(C=C(C5O)C)C(=O)O3)O)C)C)C	542.7	2000	2.43353	mol/kg
242	609346-29-4	Momfluorothrin	CC(=CC1C(C1(C)C)C(=O)OCC2=C(C(=C(C(=C2F)F)COC)F)F)C#N	385.4	2250	2.23373	mol/kg
243*	6923-22-4*	Monocrotophos*	CC(=CC(=O)NC)OP(=O)(OC)OC	223.16	0.944	5.37364	mol/kg
244*	1214-39-7*	N6-Benzyladenine*	C1=CC=C(C=C1)CNC2=NC=NC3=C2NC=N3	225.25	1599	2.14882	mol/kg
245	91-20-3	Naphthalene	C1=CC=C2C=CC=CC2=C1	128.17	2690	1.67803	mol/kg
246	86-87-3	Naphthalene acetic acid	C1=CC=C2C(=C1)C=CC=C2CC(=O)O	186.21	2510	1.87033	mol/kg
247*	15299-99-7	Napropamide*	CCN(CC)C(=O)C(C)OC1=CC=CC2=CC=CC=C21	271.35	2250	2.08135	mol/kg
248*	330-95-0	Nicarbazin	CC1=CC(=NC(=O)N1)C.C1=CC(=CC=C1NC(=O)NC2=CC=C(C=C2)[N+](=O)[O-])[N+](=O)[O-]	426.4	2250	2.27763	mol/kg
249	1420-04-8	Niclosamide	C1=CC(=C(C=C1[N+](=O)[O-])Cl)NC(=O)C2=C(C=CC(=C2)Cl)O.C(CO)N	388.2	2000	2.28803	mol/kg
250	111991-09-4	Nicosulfuron	CN(C)C(=O)C1=C(N=CC=C1)S(=O)(=O)NC(=O)NC2=NC(=CC(=N2)OC)OC	410.4	2000	2.31218	mol/kg
251	112-05-0	Nonanoic acid	CCCCCCCCC(=O)O	158.24	2250	1.84713	mol/kg
252*	11096-42-7*	Nonylphenolpolyethylene glycol - Iodine complex*	CCCCCCCCCC1=CC=C(C=C1)OCCO.II	518.2	1700	2.48405	mol/kg
251	27314-13-2	Norflurazon	CNC1=C(C(=O)N(N=C1)C2=CC=CC(=C2)C(F)(F)F)Cl	303.67	1000	2.4824	mol/kg
252	116714-46-6	Novaluron	C1=CC(=C(C(=C1)F)C(=O)NC(=O)NC2=CC(=C(C=C2)OC(C(OC(F)(F)F)F)(F)F)Cl)F	492.7	2000	2.39155	mol/kg
253	121451-02-3	Noviflumuron	C1=CC(=C(C(=C1)F)C(=O)NC(=O)NC2=CC(=C(C(=C2F)Cl)OC(C(C(F)(F)F)F)(F)F)Cl)F	529.1	2000	2.42251	mol/kg
256*	26530-20-1*	Octhilinone*	CCCCCCCCN1C(=O)C=CS1	213.34	384	2.74474	mol/kg
257*	1113-02-6*	Omethoate*	CNC(=O)CSP(=O)(OC)OC	213.19	9.6	4.3465	mol/kg
258	213464-77-8	Orthosulfamuron	CN(C)C(=O)C1=CC=CC=C1NS(=O)(=O)NC(=O)NC2=NC(=CC(=N2)OC)OC	424.4	1960	2.33552	mol/kg
259	19044-88-3	Oryzalin	CCCN(CCC)C1=C(C=C(C=C1[N+](=O)[O-])S(=O)(=O)N)[N+](=O)[O-]	346.36	506.7	2.83478	mol/kg
260	77732-09-3	Oxadixyl	CC1=C(C(=CC=C1)C)N(C(=O)COC)N2CCOC2=O	278.3	2000	2.14348	mol/kg
261	23135-22-0	Oxamyl Vydate L formulation	CNC(=O)ON=C(C(=O)N(C)C)SC	219.26	39.2	3.74767	mol/kg
262	1003318-67-9	Oxathiapiprolin	CC1=CC(=NN1CC(=O)N2CCC(CC2)C3=NC(=CS3)C4=NOC(C4)C5=C(C=CC=C5F)F)C(F)(F)F	539.5	2250	2.37981	mol/kg
263	42874-03-3	Oxyfluorfen	CCOC1=C(C=CC(=C1)OC2=C(C=C(C=C2)C(F)(F)F)Cl)[N+](=O)[O-]	361.7	5000	1.85938	mol/kg
264	7179-50-2	Oxytetracycline calcium complex	CC1(C2C(C3C(C(=O)C(=C(C3(C(=O)C2=C(C4=C1C=CC=C4O)[O-])O)O)C(=O)N)N(C)C)O)O.CC1(C2C(C3C(C(=O)C(=C(C3(C(=O)C2=C(C4=C1C=CC=C4O)[O-])O)O)C(=O)N)N(C)C)O)O.[Ca+2]	958.9	2000	2.68074	mol/kg
265	2439-01-02	Oxythioquinox	CC1=CC2=C(C=C1)N=C3C(=N2)SC(=O)S3	234.3	196	3.07752	mol/kg
266*	111578-32-6*	Pal 6000 urea compound *	CC1(CC(OC2=C1C=CC(=C2)OC3=CC=C(C=C3)NC(=O)N(C)OC)(C)OC)C	400.5	2250	2.25042	mol/kg
267*	106-46-7*	Paradichlorobenzene*	C1=CC(=CC=C1Cl)Cl	147	1608	1.96103	mol/kg
268	100-02-7	Paranitrophenol	C1=CC(=CC=C1[N+](=O)[O-])O	139.11	577	2.38218	mol/kg
269	494793-67-8	Penflufen	CC1=NN(C(=C1C(=O)NC2=CC=CC=C2C(C)CC(C)C)F)C	317.4	4000	1.89955	mol/kg
270	219714-96-2	Penoxsulam	COC1=CN=C(N2C1=NC(=N2)NS(=O)(=O)C3=C(C=CC=C3OCC(F)F)C(F)(F)F)OC	483.4	2025	2.37788	mol/kg
271*	82-68-8*	Pentachloronitrobenzene*	C1(=C(C(=C(C(=C1Cl)Cl)Cl)Cl)Cl)[N+](=O)[O-]	295.3	2250	2.11808	mol/kg
270	87-86-5	Pentachlorophenol	C1(=C(C(=C(C(=C1Cl)Cl)Cl)Cl)Cl)O	266.3	627	2.6281	mol/kg
273*	183675-82-3	Penthiopyrad	CC(C)CC(C)C1=C(C=CS1)NC(=O)C2=CN(N=C2C(F)(F)F)C	359.4	2250	2.2034	mol/kg
274	79-21-0	Peracetic acid	CC(=O)OO	76.05	829	1.96254	mol/kg
275	298-02-2	Phorate	CCOP(=S)(OCC)SCSCC	260.4	7	4.57054	mol/kg
276	96182-53-5	Phostebupirim	CCOP(=S)(OC1=CN=C(N=C1)C(C)(C)C)OC(C)C	318.37	20.3	4.19544	mol/kg
277	117428-22-5	Picoxystrobin	COC=C(C1=CC=CC=C1COC2=CC=CC(=N2)C(F)(F)F)C(=O)OC	367.3	2250	2.21284	mol/kg
278*	243973-20-8*	Pinoxaden*	CCC1=CC(=CC(=C1C2=C(N3CCOCCN3C2=O)OC(=O)C(C)(C)C)CC)C	400.5	2250	2.25042	mol/kg
279	51-03-6	Piperonyl butoxide	CCCCOCCOCCOCC1=CC2=C(C=C1CCC)OCO2	338.4	2250	2.17725	mol/kg
280	29232-93-7	Pirimiphos-methyl	CCN(CC)C1=NC(=CC(=N1)OP(=S)(OC)OC)C	305.34	40	3.88272	mol/kg
281*	9003-29-6*	Polybutene*	CCC=C.CC=CC	112.21	2150	1.71759	mol/kg
282	23031-36-9	Prallethrin	CC1=C(C(=O)CC1OC(=O)C2C(C2(C)C)C=C(C)C)CC#C	300.4	1171	2.40914	mol/kg
283*	86209-51-0*	Primisulfuron-methyl*	COC(=O)C1=CC=CC=C1S(=O)(=O)NC(=O)NC2=NC(=CC(=N2)OC(F)F)OC(F)F	468.3	2150	2.33809	mol/kg
284	29091-21-2	Prodiamine	CCCN(CCC)C1=C(C=C(C(=C1[N+](=O)[O-])N)C(F)(F)F)[N+](=O)[O-]	350.29	2250	2.19225	mol/kg
285	1610-18-0	Prometon	CC(C)NC1=NC(=NC(=N1)OC)NC(C)C	225.29	2264	1.99787	mol/kg
286	1918-16-7	Propachlor	CC(C)N(C1=CC=CC=C1)C(=O)CCl	211.69	88	3.38122	mol/kg
287	709-98-8	Propanil	CCC(=O)NC1=CC(=C(C=C1)Cl)Cl	218.08	201	3.03542	mol/kg
288	60207-90-1	Propiconazole	CCCC1COC(O1)(CN2C=NC=N2)C3=C(C=C(C=C3)Cl)Cl	342.2	2510	2.13461	mol/kg
289	57-55-6	Propylene Glycol	CC(CO)O	76.09	2000	1.5803	mol/kg
290	23950-58-5	Propyzamide	CC(C)(C#C)NC(=O)C1=CC(=CC(=C1)Cl)Cl	256.12	2250	2.05626	mol/kg
291	94125-34-5	Prosulfuron	CC1=NC(=NC(=N1)OC)NC(=O)NS(=O)(=O)C2=CC=CC=C2CCC(F)(F)F	419.4	2150	2.29019	mol/kg
292	120983-64-4	Prothiaconazole Desthio metabolite	C1CC1(C(CC2=CC=CC=C2Cl)(CN3C=NC=N3)O)Cl	312.2	2000	2.1934	mol/kg
293	178928-70-6	Prothioconazole	C1CC1(C(CC2=CC=CC=C2Cl)(CN3C(=S)N=CN3)O)Cl	344.3	2000	2.23591	mol/kg
294	123312-89-0	Pymetrozine	CC1=NNC(=O)N(C1)N=CC2=CN=CC=C2	217.23	2000	2.03589	mol/kg
295	175013-18-0	Pyraclostrobin	COC(=O)N(C1=CC=CC=C1COC2=NN(C=C2)C3=CC=C(C=C3)Cl)OC	387.8	2000	2.28758	mol/kg
296	365400-11-9	Pyrasulfotole	CC1=C(C(=O)N(N1)C)C(=O)C2=C(C=C(C=C2)C(F)(F)F)S(=O)(=O)C	362.33	2000	2.25807	mol/kg
297	8003-34-7	Pyrethrins	CC1=C(C(=O)CC1OC(=O)C2C(C2(C)C)C=C(C)C)CC=CC=C.CC1=C(C(=O)CC1OC(=O)C2C(C2(C)C)C=C(C)C(=O)OC)CC=CC=C	700.9	2000	2.54463	mol/kg
298	96489-71-3	Pyridaben	CC(C)(C)C1=CC=C(C=C1)CSC2=C(C(=O)N(N=C2)C(C)(C)C)Cl	364.9	2250	2.20999	mol/kg
299	179101-81-6	Pyridalyl	C1=CC(=NC=C1C(F)(F)F)OCCCOC2=C(C=C(C=C2Cl)OCC=C(Cl)Cl)Cl	491.1	2250	2.33899	mol/kg
300	53112-28-0	Pyrimethanil	CC1=CC(=NC(=N1)NC2=CC=CC=C2)C	199.25	2012	1.99577	mol/kg
301	95737-68-1	Pyriproxyfen	CC(COC1=CC=C(C=C1)OC2=CC=CC=C2)OC3=CC=CC=N3	321.4	2000	2.20602	mol/kg
302	447399-55-5	Pyroxasulfone	CC1(CC(=NO1)S(=O)(=O)CC2=C(N(N=C2C(F)(F)F)C)OC(F)F)C	391.32	2250	2.24035	mol/kg
303	422556-08-9	Pyroxsulam	COC1=CC(=NC2=NC(=NN12)NS(=O)(=O)C3=C(C=CN=C3OC)C(F)(F)F)OC	434.35	2105	2.31459	mol/kg
304*	84087-01-4*	Quinclorac*	C1=CC(=C(C2=NC=C(C=C21)Cl)C(=O)O)Cl	242.05	2000	2.08288	mol/kg
305*	124495-18-7*	Quinoxyfen*	C1=CC(=CC=C1OC2=C3C(=CC(=CC3=NC=C2)Cl)Cl)F	308.1	2250	2.13651	mol/kg
306*	122931-48-0*	Rimsulfuron*	CCS(=O)(=O)C1=C(N=CC=C1)S(=O)(=O)NC(=O)NC2=NC(=CC(=N2)OC)OC	431.4	562.5	2.88476	mol/kg
307	372137-35-4	Saflufenacil	CC(C)N(C)S(=O)(=O)NC(=O)C1=CC(=C(C=C1Cl)F)N2C(=O)C=C(N(C2=O)C)C(F)(F)F	500.9	2000	2.39872	mol/kg
308	87392-12-9	S-Metolachlor	CCC1=CC=CC(=C1N(C(C)COC)C(=O)CCl)C	283.79	2510	2.05332	mol/kg
309*	1072957-71-1*	Solatenol*	CN1C=C(C(=N1)C(F)F)C(=O)NC2=CC=CC3=C2C4CCC3C4=C(Cl)Cl	398.2	1373	2.46243	mol/kg
310	131929-60-7	Spinosad	CCC1CCCC(C(C(=O)C2=CC3C4CC(CC4C=CC3C2CC(=O)O1)OC5C(C(C(C(O5)C)OC)OC)OC)C)OC6CCC(C(O6)C)N(C)C	732	1333	2.73968	mol/kg
311*	148477-71-8*	Spirodiclofen*	CCC(C)(C)C(=O)OC1=C(C(=O)OC12CCCCC2)C3=C(C=C(C=C3)Cl)Cl	411.3	2000	2.31313	mol/kg
312	283594-90-1	Spiromesifen	CC1=CC(=C(C(=C1)C)C2=C(C3(CCCC3)OC2=O)OC(=O)CC(C)(C)C)C	370.5	2000	2.26776	mol/kg
313*	203313-25-1*	Spirotetramat*	CCOC(=O)OC1=C(C(=O)NC12CCC(CC2)OC)C3=C(C=CC(=C3)C)C	373.4	2000	2.27114	mol/kg
312	118134-30-8	Spiroxamine	CCCN(CC)CC1COC2(O1)CCC(CC2)C(C)(C)C	297.5	554	2.72998	mol/kg
313	3810-74-0	Streptomycin sulfate	CC1C(C(C(O1)OC2C(C(C(C(C2O)O)N=C(N)N)O)N=C(N)N)OC3C(C(C(C(O3)CO)O)O)NC)(C=O)O.CC1C(C(C(O1)OC2C(C(C(C(C2O)O)N=C(N)N)O)N=C(N)N)OC3C(C(C(C(O3)CO)O)O)NC)(C=O)O.OS(=O)(=O)O.OS(=O)(=O)O.OS(=O)(=O)O	1457.4	2000	2.86255	mol/kg
314	122836-35-5	Sulfentrazone	CC1=NN(C(=O)N1C(F)F)C2=C(C=C(C(=C2)NS(=O)(=O)C)Cl)Cl	387.2	2250	2.23575	mol/kg
315	4151-50-2	Sulfluramid	CCNS(=O)(=O)C(C(C(C(C(C(C(C(F)(F)F)(F)F)(F)F)(F)F)(F)F)(F)F)(F)F)(F)F	527.2	474	3.0462	mol/kg
316	141776-32-1	Sulfosulfuron	CCS(=O)(=O)C1=C(N2C=CC=CC2=N1)S(=O)(=O)NC(=O)NC3=NC(=CC(=N3)OC)OC	470.5	2250	2.32038	mol/kg
317	35400-43-2	Sulprofos	CCCSP(=S)(OCC)OC1=CC=C(C=C1)SC	322.5	47	3.83643	mol/kg
318	2687-94-7	Surfadone	CCCCCCCCN1CCCC1=O	197.32	1838	2.03083	mol/kg
319	21564-17-0	TCMTB	C1=CC=C2C(=C1)N=C(S2)SCSC#N	238.4	660.85	2.5572	mol/kg
320	119168-77-3	Tebufenpyrad	CCC1=NN(C(=C1Cl)C(=O)NCC2=CC=C(C=C2)C(C)(C)C)C	333.9	2000	2.22259	mol/kg
323*	34014-18-1*	Tebuthiuron*	CC(C)(C)C1=NN=C(S1)N(C)C(=O)NC	228.32	500	2.65957	mol/kg
322	3383-96-8	Temephos	COP(=S)(OC)OC1=CC=C(C=C1)SC2=CC=C(C=C2)OP(=S)(OC)OC	466.5	27.4	4.2311	mol/kg
323	5902-51-2	Terbacil	CC1=C(C(=O)N(C(=O)N1)C(C)(C)C)Cl	216.66	2250	1.9836	mol/kg
324	13071-79-9	Terbufos	CCOP(=S)(OCC)SCSC(C)(C)C	288.4	28.6	4.00363	mol/kg
325	10543-57-4	Tetraacetylethylenediamine	CC(=O)N(CCN(C(=O)C)C(=O)C)C(=O)C	228.24	2000	2.05736	mol/kg
326	112281-77-3	Tetraconazole	C1=CC(=C(C=C1Cl)Cl)C(CN2C=NC=N2)COC(C(F)F)(F)F	372.14	131	3.45344	mol/kg
329*	58842-20-9*	Tetrahydro-2(nitromethylene)-2H-1, 3-thiazine*	C1CNC(=C[N+](=O)[O-])SC1	160.2	2290	1.84483	mol/kg
330	7696-12-0	Tetramethrin	CC(=CC1C(C1(C)C)C(=O)OCN2C(=O)C3=C(C2=O)CCCC3)C	331.4	2250	2.16817	mol/kg
331	5395-50-6	Tetramethylol acetylenediurea	C(N1C2C(N(C1=O)CO)N(C(=O)N2CO)CO)O	262.22	2000	2.11764	mol/kg
332	148-79-8	Thiabendazole	C1=CC=C2C(=C1)NC(=N2)C3=CSC=N3	201.25	2250	1.95155	mol/kg
333	111988-49-9	Thiacloprid	C1CSC(=NC#N)N1CC2=CN=C(C=C2)Cl	252.72	2000	2.10161	mol/kg
334*	117718-60-2*	Thiazopyr*	CC(C)CC1=C(C(=NC(=C1C(=O)OC)C(F)F)C(F)(F)F)C2=NCCS2	396.4	1913	2.31642	mol/kg
335*	51707-55-2*	Thidiazuron*	C1=CC=C(C=C1)NC(=O)NC2=CN=NS2	220.25	3160	1.84323	mol/kg
336	317815-83-1	Thiencarbazone methyl	CC1=C(C(=CS1)C(=O)OC)S(=O)(=O)NC(=O)N2C(=O)N(C(=N2)OC)C	390.4	1928	2.3064	mol/kg
337	28249-77-6	Thiobencarb	CCN(CC)C(=O)SCC1=CC=C(C=C1)Cl	257.78	7800	1.51915	mol/kg
338	59669-26-0	Thiodicarb	CC(=NOC(=O)N(C)SN(C)C(=O)ON=C(C)SC)SC	354.5	2023	2.24362	mol/kg
339	129558-76-5	Tolfenpyrad	CCC1=NN(C(=C1Cl)C(=O)NCC2=CC=C(C=C2)OC3=CC=C(C=C3)C)C	383.9	87	3.6447	mol/kg
340	731-27-1	Tolylfluanid	CC1=CC=C(C=C1)N(SC(F)(Cl)Cl)S(=O)(=O)N(C)C	347.3	2000	2.23967	mol/kg
341	210631-68-8	Topramezone	CC1=C(C=CC(=C1C2=NOCC2)S(=O)(=O)C)C(=O)C3=CNN(C3=O)C	363.4	2000	2.25935	mol/kg
342	8001-35-2	Toxaphene	C=C1C(C2(C(C(C1(C2(Cl)Cl)Cl)Cl)Cl)Cl)(CCl)CCl	411.8	85.5	3.68272	mol/kg
343	66841-25-6	Tralomethrin	CC1(C(C1C(=O)OC(C#N)C2=CC(=CC=C2)OC3=CC=CC=C3)C(C(Br)(Br)Br)Br)C	665	2510	2.42315	mol/kg
344	43121-43-3	Triadimefon	CC(C)(C)C(=O)C(N1C=NC=N1)OC2=CC=C(C=C2)Cl	293.75	2000	2.16695	mol/kg
345	55219-65-3	Triadimenol	CC(C)(C)C(C(N1C=NC=N1)OC2=CC=C(C=C2)Cl)O	295.76	2000	2.16991	mol/kg
346*	82097-50-5*	Triasulfuron*	CC1=NC(=NC(=N1)OC)NC(=O)NS(=O)(=O)C2=CC=CC=C2OCCCl	401.8	2150	2.27157	mol/kg
347	101200-48-0	Tribenuron methyl	CC1=NC(=NC(=N1)OC)N(C)C(=O)NS(=O)(=O)C2=CC=CC=C2C(=O)OC	395.4	2250	2.24485	mol/kg
348	7673-09-08	Trichloromelamine	C1(=NC(=NC(=N1)NCl)NCl)NCl	229.45	2150	2.02825	mol/kg
349	87-90-1	Trichloro-s-triazinetrione	C1(=O)N(C(=O)N(C(=O)N1Cl)Cl)Cl	232.41	1674	2.1425	mol/kg
350	64700-56-7	Triclopyr butoxyethyl ester	CCCCOCCOC(=O)COC1=NC(=C(C=C1Cl)Cl)Cl	356.6	849.2	2.62317	mol/kg
351*	3380-34-5*	Triclosan*	C1=CC(=C(C=C1Cl)O)OC2=C(C=C(C=C2)Cl)Cl	289.5	825	2.54519	mol/kg
352*	27519-02-4*	Tricosene*	CCCCCCCCCCCCCC=CCCCCCCCC	322.6	2000	2.20763	mol/kg
353	141517-21-7	Trifloxystrobin	CC(=NOCC1=CC=CC=C1C(=NOC)C(=O)OC)C2=CC(=CC=C2)C(F)(F)F	408.4	2000	2.31006	mol/kg
354	68694-11-1	Triflumizole	CCCOCC(=NC1=C(C=C(C=C1)Cl)C(F)(F)F)N2C=CN=C2	345.75	2510	2.13909	mol/kg
355	1582-09-8	Trifluralin	CCCN(CCC)C1=C(C=C(C=C1[N+](=O)[O-])C(F)(F)F)[N+](=O)[O-]	335.28	2000	2.22438	mol/kg
356	126535-15-7	Triflusulfuron methyl	CC1=C(C(=CC=C1)C(=O)OC)S(=O)(=O)NC(=O)NC2=NC(=NC(=N2)OCC(F)(F)F)N(C)C	492.4	2250	2.34014	mol/kg
357*	26644-46-2*	Triforine*	C1CN(CCN1C(C(Cl)(Cl)Cl)NC=O)C(C(Cl)(Cl)Cl)NC=O	435	2000	2.33746	mol/kg
358	2686-99-9	Trimethacarb	CC1=CC(=CC(=C1C)C)OC(=O)NC	193.24	238	2.90952	mol/kg
359*	131983-72-7	Triticonazole	CC1(CCC(=CC2=CC=C(C=C2)Cl)C1(CN3C=NC=N3)O)C	317.8	1900	2.2234	mol/kg
360*	83657-17-4*	Uniconazole*	CC(C)(C)C(C(=CC1=CC=C(C=C1)Cl)N2C=NC=N2)O	291.77	1461	2.30039	mol/kg
361	1929-77-7	Vernolate	CCCN(CCC)C(=O)SCCC	203.35	2250	1.95606	mol/kg
362*	50471-44-8*	Vinclozolin*	CC1(C(=O)N(C(=O)O1)C2=CC(=CC(=C2)Cl)Cl)C=C	286.11	2510	2.05686	mol/kg
363	53939-28-9	Z-11-Hexadecanol	CCCCC=CCCCCCCCCCC=O	238.41	2250	2.02514	mol/kg
364	156052-68-5	Zoxamide	CCC(C)(C(=O)CCl)NC(=O)C1=CC(=C(C(=C1)Cl)C)Cl	336.6	2000	2.22608	mol/kg
		*Test set compounds

## Sheet: MD
Sl No	CAS No	Name	Canonical Smiles	MW	TOXICITY	pLD50	Unit
1	20679-58-7	1,4-Bis(bromoacetoxy)-2-butene	C(C=CCOC(=O)CBr)OC(=O)CBr	329.97	196	3.22622	mol/kg
2	94-75-7	2,4-D Acid	C1=CC(=C(C=C1Cl)Cl)OCC(=O)O	221.03	2000	2.04342	mol/kg
3*	25168-26-7*	2,4-D Isooctyl Ester*	CC(C)CCCCCOC(=O)COC1=C(C=C(C=C1)Cl)Cl	333.2	663	2.70119	mol/kg
4	3547-33-9	2-Hydroxyethyl octyl sulfide	CCCCCCCCSCCO	190.35	2250	1.92737	mol/kg
5	2224-44-4	4-(2-nitrobutyl) morpholine	CCC(CN1CCOCC1)[N+](=O)[O-]	188.22	1000	2.27467	mol/kg
6	51200-87-4	4,4-Dimethyloxazolidine	CC1(COCN1)C	101.15	1105	1.9616	mol/kg
7	64359-81-5	4,5-Dichloro-2-n-octyl-3(2H)-isothiazolone	CCCCCCCCN1C(=O)C(=C(S1)Cl)Cl	282.2	4640	1.78404	mol/kg
8	30560-19-1	Acephate	CC(=O)NP(=O)(OC)SC	183.17	234	2.89364	mol/kg
9*	57960-19-7*	Acequinocyl*	CCCCCCCCCCCCC1=C(C(=O)C2=CC=CC=C2C1=O)OC(=O)C	384.5	2000	2.28387	mol/kg
10	135410-20-7	Acetamiprid	CC(=NC#N)N(C)CC1=CN=C(C=C1)Cl	222.67	87	3.40814	mol/kg
11	34256-82-1	Acetochlor	CCC1=CC=CC(=C1N(COCC)C(=O)CCl)C	269.77	1788	2.17863	mol/kg
12*	135158-54-2*	Acibenzolar-s-methyl*	CSC(=O)C1=C2C(=CC=C1)N=NS2	210.3	2000	2.02181	mol/kg
13	68424-85-1	ADBAC	CCCCCCCCCCCCCC[N+](C)(C)Cc1ccccc1.[Cl-]	367.301	3700	1.99682	mol/kg
14	15972-60-8	Alachlor	CCC1=C(C(=CC=C1)CC)N(COC)C(=O)CCl	269.77	2000	2.12996	mol/kg
15	1646-88-4	Aldoxycarb	CC(C)(C=NOC(=O)NC)S(=O)(=O)C	222.26	33.5	3.82182	mol/kg
16	584-79-2	Allethrin	CC1=C(C(=O)CC1OC(=O)C2C(C2(C)C)C=C(C)C)CC=C	302.4	2000	2.17955	mol/kg
17*	865318-97-4*	Ametoctradin*	CCCCCCCCC1=C(N2C(=NC=N2)N=C1CC)N	275.39	2000	2.13892	mol/kg
18	101-05-3	Anilazine	C1=CC=C(C(=C1)NC2=NC(=NC(=N2)Cl)Cl)Cl	275.5	2000	2.13909	mol/kg
19	1912-24-9	Atrazine	CCNC1=NC(=NC(=N1)Cl)NC(C)C	215.68	2000	2.03278	mol/kg
20	73989-17-0	Avermectin	CCC(C)C1C(C=CC2(O1)CC3CC(O2)CC=C(C(C(C=CC=C4COC5C4(C(C=C(C5O)C)C(=O)O3)O)C)OC6CC(C(C(O6)C)OC7CC(C(C(O7)C)O)OC)OC)C)C	873.1	85	4.01165	mol/kg
21	86-50-0	Azinphos-methyl	COP(=S)(OC)SCN1C(=O)C2=CC=CC=C2N=N1	317.3	136	3.36793	mol/kg
22	131860-33-8	Azoxystrobin	COC=C(C1=CC=CC=C1OC2=NC=NC(=C2)OC3=CC=CC=C3C#N)C(=O)OC	403.4	250	3.2078	mol/kg
23*	22781-23-3*	Bendiocarb*	CC1(OC2=C(O1)C(=CC=C2)OC(=O)NC)C	223.22	3.1	4.85737	mol/kg
24	1861-40-1	Benfluralin	CCCCN(CC)C1=C(C=C(C=C1[N+](=O)[O-])C(F)(F)F)[N+](=O)[O-]	335.28	2000	2.22438	mol/kg
25	65-85-0	Benzoic acid	C1=CC=C(C=C1)C(=O)O	122.12	2510	1.68711	mol/kg
26*	163269-30-5*	Bethoxazin, R102622 (Canceled in U.S.)*	C1CS(=O)C(=NO1)C2=CC3=CC=CC=C3S2	251.3	2000	2.09916	mol/kg
27	3064-70-8	Bis (trichloromethyl) sulfone	C(S(=O)(=O)C(Cl)(Cl)Cl)(Cl)(Cl)Cl	300.8	2250	2.1261	mol/kg
28	7166-19-0	Bromonitrostyrene	C1=CC=C(C=C1)C=C([N+](=O)[O-])Br	228.04	500	2.65904	mol/kg
29*	52-51-7*	Bronopol*	C(C(CO)([N+](=O)[O-])Br)O	199.99	509	2.59429	mol/kg
30	69327-76-0	Buprofezin	CC(C)N1C(=NC(C)(C)C)SCN(C1=O)C2=CC=CC=C2	305.4	2000	2.18384	mol/kg
31	21564-17-0	Busan	C1=CC=C2C(=C1)N=C(S2)SCSC#N	238.4	497	2.68095	mol/kg
32	134605-64-4	Butafenacil	CC(C)(C(=O)OCC=C)OC(=O)C1=C(C=CC(=C1)N2C(=O)C=C(N(C2=O)C)C(F)(F)F)Cl	474.8	2250	2.32433	mol/kg
33	133-06-2	Captan	C1C=CCC2C1C(=O)N(C2=O)SC(Cl)(Cl)Cl	300.6	2000	2.17696	mol/kg
34	63-25-2	Carbaryl	CNC(=O)OC1=CC=CC2=CC=CC=C21	201.22	2000	2.00264	mol/kg
35*	10605-21-7*	Carbendazim*	COC(=O)NC1=NC2=CC=CC=C2N1	191.19	1000	2.28147	mol/kg
36	5234-68-4	Carboxin	CC1=C(SCCO1)C(=O)NC2=CC=CC=C2	235.3	6094	1.58672	mol/kg
37	90982-32-4	Chlorimuron Ethyl	CCOC(=O)C1=CC=CC=C1S(=O)(=O)NC(=O)NC2=NC(=CC(=N2)Cl)OC	414.8	2510	2.21817	mol/kg
38*	510-15-6*	Chlorobenzilate*	CCOC(=O)C(C1=CC=C(C=C1)Cl)(C2=CC=C(C=C2)Cl)O	325.2	2250	2.15997	mol/kg
39*	2675-77-6*	Chloroneb*	COC1=CC(=C(C=C1Cl)OC)Cl	207.05	5000	1.61711	mol/kg
40	107-94-8	Chloroprop acid (3-CPA)	C(CCl)C(=O)O	108.52	3352	1.51021	mol/kg
41	1897-45-6	Chlorothalonil	C(#N)C1=C(C(=C(C(=C1Cl)Cl)Cl)C#N)Cl	265.9	4640	1.7582	mol/kg
42	101-21-3	Chlorpropham	CC(C)OC(=O)NC1=CC(=CC=C1)Cl	213.66	2000	2.02869	mol/kg
43	2921-88-2	Chlorpyrifos	CCOP(=S)(OCC)OC1=NC(=C(C=C1Cl)Cl)Cl	350.6	75.6	3.66629	mol/kg
44	5598-13-0	Chlorpyrifos methyl	COP(=S)(OC)OC1=NC(=C(C=C1Cl)Cl)Cl	322.5	1590	2.30713	mol/kg
45	64902-72-3	Chlorsulfuron	CC1=NC(=NC(=N1)OC)NC(=O)NS(=O)(=O)C2=CC=CC=C2Cl	357.77	5000	1.85463	mol/kg
46	104-55-2	Cinnamaldehyde	C1=CC=C(C=C1)C=CC=O	132.16	2510	1.72143	mol/kg
47*	105512-06-9*	Clodinafop-propargyl*	CC(C(=O)OCC#C)OC1=CC=C(C=C1)OC2=C(C=C(C=N2)Cl)F	349.7	2000	2.24267	mol/kg
48*	74115-24-5*	Clofentezine*	C1=CC=C(C(=C1)C2=NN=C(N=N2)C3=CC=CC=C3Cl)Cl	303.1	3000	2.00446	mol/kg
49	81777-89-1	Clomazone	CC1(CON(C1=O)CC2=CC=CC=C2Cl)C	239.7	2510	1.97999	mol/kg
50	99607-70-2	Cloquintocet-mexyl	CCCCCC(C)OC(=O)COC1=C2C(=C(C=C1)Cl)C=CC=N2	335.8	2000	2.22505	mol/kg
51	56-72-4	Coumaphos	CCOP(=S)(OCC)OC1=CC2=C(C=C1)C(=C(C(=O)O2)Cl)C	362.8	29.8	4.08545	mol/kg
52*	400882-07-7*	Cyflumetofen*	CC(C)(C)C1=CC=C(C=C1)C(C#N)(C(=O)C2=CC=CC=C2C(F)(F)F)C(=O)OCCOC	447.4	2250	2.29851	mol/kg
53	122008-85-9	Cyhalofop-butyl	CCCCOC(=O)C(C)OC1=CC=C(C=C1)OC2=C(C=C(C=C2)C#N)F	357.4	2250	2.20097	mol/kg
54	68085-85-8	Cyhalothrin	CC1(C(C1C(=O)OC(C#N)C2=CC(=CC=C2)OC3=CC=CC=C3)C=C(C(F)(F)F)Cl)C	449.8	5000	1.95405	mol/kg
55	57966-95-7	Cymoxanil	CCNC(=O)NC(=O)C(=NOC)C#N	198.18	2250	1.94488	mol/kg
56*	121552-61-2*	Cyprodinil*	CC1=CC(=NC(=N1)NC2=CC=CC=C2)C3CC3	225.29	500	2.65377	mol/kg
57	66215-27-8	Cyromazine	C1CC1NC2=NC(=NC(=N2)N)N	166.18	2510	1.82091	mol/kg
58	1596-84-5	Daminozide	CN(C)NC(=O)CCC(=O)O	160.17	2250	1.8524	mol/kg
59*	10222-01-2*	DBNPA*	C(#N)C(C(=O)N)(Br)Br	241.87	216	3.04913	mol/kg
60	50-29-3	DDT	C1=CC(=CC=C1C(C2=CC=C(C=C2)Cl)C(Cl)(Cl)Cl)Cl	354.5	2240	2.19937	mol/kg
61	52918-63-5	Deltamethrin	CC1(C(C1C(=O)OC(C#N)C2=CC(=CC=C2)OC3=CC=CC=C3)C=C(Br)Br)C	505.2	4640	2.03695	mol/kg
62*	8065-48-3*	Demeton*	CCOP(=O)(OCC)SCCSCC.CCOP(=S)(OCC)OCCSCC	516.7	7.19	4.85651	mol/kg
63*	333-41-5*	Diazinon*	CCOP(=S)(OCC)OC1=NC(=NC(=C1)C)C(C)C	304.35	3.54	4.93437	mol/kg
64	35691-65-7	Dibromodicyanobutane	CCC(C#N)C(C#N)(Br)Br	265.93	1064	2.39783	mol/kg
65	1918-00-9	Dicamba	COC1=C(C=CC(=C1C(=O)O)Cl)Cl	221.03	1373	2.20678	mol/kg
66*	2300-66-5*	Dicamba dimethylamine salt Banvel CST*	CNC.COC1=C(C=CC(=C1C(=O)O)Cl)Cl	266.12	2510	2.0254	mol/kg
67	1194-65-6	Dichlobenil	C1=CC(=C(C(=C1)Cl)C#N)Cl	172.01	50	3.53658	mol/kg
68*	62-73-7*	Dichlorvos*	COP(=O)(OC)OC=C(Cl)Cl	220.97	7.8	4.45224	mol/kg
69	99-30-9	Dicloran	C1=C(C=C(C(=C1Cl)N)Cl)[N+](=O)[O-]	207.01	2000	2.01496	mol/kg
70	141-66-2	Dicrotophos	CC(=CC(=O)N(C)C)OP(=O)(OC)OC	237.19	4.24	4.74773	mol/kg
71	60-57-1	Dieldrin	C1C2C3C(C1C4C2O4)C5(C(=C(C3(C5(Cl)Cl)Cl)Cl)Cl)Cl	380.9	381	2.99989	mol/kg
72	35367-38-5	Diflubenzuron	C1=CC(=C(C(=C1)F)C(=O)NC(=O)NC2=CC=C(C=C2)Cl)F	310.68	5000	1.79334	mol/kg
73*	55290-64-7*	Dimethipin*	CC1=C(S(=O)(=O)CCS1(=O)=O)C	210.3	880	2.37836	mol/kg
74	60-51-5	Dimethoate	CNC(=O)CSP(=S)(OC)OC	229.3	41.7	3.74027	mol/kg
75*	110488-70-5*	Dimethomorph*	COC1=C(C=C(C=C1)/C(=C/C(=O)N2CCOCC2)/C3=CC=C(C=C3)Cl)OC	387.9	2000	2.28769	mol/kg
76	68-12-2	Dimethylformamide	CN(C)C=O	73.09	2000	1.56283	mol/kg
77	88-85-7	Dinoseb	CCC(C)C1=C(C(=CC(=C1)[N+](=O)[O-])[N+](=O)[O-])O	240.21	27	3.94923	mol/kg
78*	82-66-6*	Diphacinone*	C1=CC=C(C=C1)C(C2=CC=CC=C2)C(=O)C3C(=O)C4=CC=CC=C4C3=O	340.4	3158	2.03258	mol/kg
79	298-04-4	Disulfoton	CCOP(=S)(OCC)SCCSCC	274.4	6.54	4.62281	mol/kg
80	330-54-1	Diuron	CN(C)C(=O)NC1=CC(=C(C=C1)Cl)Cl	233.09	2000	2.06649	mol/kg
81	6440-58-0	DMDMH -55 Dantoin	CC1(C(=O)N(C(=O)N1CO)CO)C	188.18	1470	2.10726	mol/kg
82	2439.10.3	Dodine	CCCCCCCCCCCCN=C(N)N.CC(=O)O	287.44	856	2.52607	mol/kg
83	29873-30-1	DTEA	CCCCCCCCCCSCCN	217.42	2250	1.98512	mol/kg
84	119791-41-2	Emamectin benzoate	CCC(C)C1C(C=CC2(O1)CC3CC(O2)CC=C(C(C(C=CC=C4COC5C4(C(C=C(C5O)C)C(=O)O3)O)C)OC6CC(C(C(O6)C)OC7CC(C(C(O7)C)NC)OC)OC)C)C.C1=CC=C(C=C1)C(=O)O	1008.2	46	4.34079	mol/kg
85*	115-29-7*	Endosulfan*	C1C2C(COS(=O)O1)C3(C(=C(C2(C3(Cl)Cl)Cl)Cl)Cl)Cl	406.9	28	4.16233	mol/kg
86	145-73-3	Endothall	C1CC2C(C(C1O2)C(=O)O)C(=O)O	186.16	229	2.91005	mol/kg
87	72-20-8	Endrin	C1C2C3C(C1C4C2O4)C5(C(=C(C3(C5(Cl)Cl)Cl)Cl)Cl)Cl	380.9	5.64	4.82953	mol/kg
88*	2104-64-5*	EPN*	CCOP(=S)(C1=CC=CC=C1)OC2=CC=C(C=C2)[N+](=O)[O-]	323.31	3.08	5.02107	mol/kg
89*	759-94-4*	EPTC*	CCCN(CCC)C(=O)SCC	189.32	1000	2.2772	mol/kg
90	97780-06-8	Ethametsulfuron methyl	CCOC1=NC(=NC(=N1)NC(=O)NS(=O)(=O)C2=CC=CC=C2C(=O)OC)NC	410.4	2250	2.26102	mol/kg
91	563-12-2	Ethion	CCOP(=S)(OCC)SCSP(=S)(OCC)OCC	384.5	2000	2.28387	mol/kg
92	80844-07-1	Ethofenprox	CCOC1=CC=C(C=C1)C(C)(C)COCC2=CC(=CC=C2)OC3=CC=CC=C3	376.5	2000	2.27473	mol/kg
93	13194-48-4	Ethoprop	CCCSP(=O)(OCC)SCCC	242.3	12.6	4.28398	mol/kg
94*	67763-08-0*	Ethoxylated alcohols (Tergitol 12-P-6)*	CCCCCCCCCCCCCCCCCCCCOCC	326.6	2000	2.21299	mol/kg
95	153233-91-1	Etoxazole	CCOC1=C(C=CC(=C1)C(C)(C)C)C2COC(=N2)C3=C(C=CC=C3F)F	359.4	2000	2.25455	mol/kg
96	22224-92-6	Fenamiphos	CCOP(=O)(NC(C)C)OC1=CC(=C(C=C1)SC)C	303.36	1.68	5.25665	mol/kg
97*	120928-09-8*	Fenazaquin*	CC(C)(C)C1=CC=C(C=C1)CCOC2=NC=NC3=CC=CC=C32	306.4	2000	2.18526	mol/kg
98	66441-23-4	Fenoxaprop-ethyl	CCOC(=O)C(C)OC1=CC=C(C=C1)OC2=NC3=C(O2)C=C(C=C3)Cl	361.8	2510	2.15879	mol/kg
99	72490-01-8	Fenoxycarb	CCOC(=O)NCCOC1=CC=C(C=C1)OC2=CC=CC=C2	301.34	3000	2.00194	mol/kg
100	71283-80-2	Fenoxaprop-p-ethyl	CCOC(=O)C(C)OC1=CC=C(C=C1)OC2=NC3=C(O2)C=C(C=C3)Cl	361.8	2000	2.25744	mol/kg
101	39515-41-8	Fenpropathrin	CC1(C(C1(C)C)C(=O)OC(C#N)C2=CC(=CC=C2)OC3=CC=CC=C3)C	349.4	1089	2.5063	mol/kg
102	134098-61-6	Fenpyroximate	CC1=NN(C(=C1C=NOCC2=CC=C(C=C2)C(=O)OC(C)(C)C)OC3=CC=CC=C3)C	421.5	2000	2.32377	mol/kg
103	55-38-9	Fenthion	CC1=C(C=CC(=C1)OP(=S)(OC)OC)SC	278.3	5.94	4.67073	mol/kg
104	51630-58-1	Fenvalerate	CC(C)C(C1=CC=C(C=C1)Cl)C(=O)OC(C#N)C2=CC(=CC=C2)OC3=CC=CC=C3	419.9	4640	1.95663	mol/kg
105*	205650-65-3*	Fipronil MB 46513 metabolite*	C1=C(C=C(C(=C1Cl)N2C(=C(C(=N2)C#N)C(F)(F)F)N)Cl)C(F)(F)F	389.08	420	2.96679	mol/kg
106*	104040-78-0*	Flazasulfuron*	COC1=CC(=NC(=N1)NC(=O)NS(=O)(=O)C2=C(C=CC=N2)C(F)(F)F)OC	407.33	2250	2.25776	mol/kg
107	158062-67-0	Flonicamid	C1=CN=CC(=C1C(F)(F)F)C(=O)NCC#N	229.16	2000	2.05911	mol/kg
108	69806-50-4	Fluazifop-butyl	CCCCOC(=O)C(C)OC1=CC=C(C=C1)OC2=NC=C(C=C2)C(F)(F)F	383.4	5000	1.88468	mol/kg
109	79241-46-6	Fluazifop-P-butyl	CCCCOC(=O)C(C)OC1=CC=C(C=C1)OC2=NC=C(C=C2)C(F)(F)F	383.4	3528	2.03612	mol/kg
110*	79622-59-6*	Fluazinam*	C1=C(C=NC(=C1Cl)NC2=C(C=C(C(=C2[N+](=O)[O-])Cl)C(F)(F)F)[N+](=O)[O-])C(F)(F)F	465.09	4190	2.04532	mol/kg
111	33245-39-5	Fluchloralin (uses canceled in U.S.)	CCCN(CCCl)C1=C(C=C(C=C1[N+](=O)[O-])C(F)(F)F)[N+](=O)[O-]	355.7	13000	1.43714	mol/kg
112	70124-77-5	Flucythrinate	CC(C)C(C1=CC=C(C=C1)OC(F)F)C(=O)OC(C#N)C2=CC(=CC=C2)OC3=CC=CC=C3	451.5	2510	2.25498	mol/kg
113*	142459-58-3*	Flufenacet*	CC(C)N(C1=CC=C(C=C1)F)C(=O)COC2=NN=C(S2)C(F)(F)F	363.33	2000	2.25927	mol/kg
114	2164-17-2	Fluometuron	CN(C)C(=O)NC1=CC=CC(=C1)C(F)(F)F	232.2	2000	2.06483	mol/kg
115	239110-15-7	Fluopicolide	C1=CC(=C(C(=C1)Cl)C(=O)NCC2=C(C=C(C=N2)C(F)(F)F)Cl)Cl	383.6	2250	2.2317	mol/kg
116	81406-37-3	Fluroxypyr 1-methylheptyl ester	CCCCCCC(C)OC(=O)COC1=NC(=C(C(=C1Cl)N)Cl)F	367.2	2000	2.26387	mol/kg
117*	69377-81-7*	Fluroxypyr acid*	C(C(=O)O)OC1=NC(=C(C(=C1Cl)N)Cl)F	255.03	2000	2.10556	mol/kg
118	66332-96-5	Flutolanil	CC(C)OC1=CC=CC(=C1)NC(=O)C2=CC=CC=C2C(F)(F)F	323.31	2000	2.20859	mol/kg
119*	76674-21-0*	Flutriafol*	C1=CC=C(C(=C1)C(CN2C=NC=N2)(C3=CC=C(C=C3)F)O)F	301.29	5000	1.78001	mol/kg
120	907204-31-3	Fluxapyroxad	CN1C=C(C(=N1)C(F)F)C(=O)NC2=CC=CC=C2C3=CC(=C(C(=C3)F)F)F	381.3	2000	2.28024	mol/kg
121	944-22-9	Fonofos	CCOP(=S)(CC)SC1=CC=CC=C1	246.3	16.9	4.16358	mol/kg
122	173159-57-4	Foramsulfuron	CN(C)C(=O)C1=C(C=C(C=C1)NC=O)S(=O)(=O)NC(=O)NC2=NC(=CC(=N2)OC)OC	452.4	2000	2.35449	mol/kg
123	98886-44-3	Fosthiazate	CCC(C)SP(=O)(N1CCSC1=O)OCC	283.4	20	4.15137	mol/kg
124	98-01-1	Furfural	C1=COC(=C1)C=O	96.08	360.5	2.42573	mol/kg
125*	111-30-8*	Glutaraldehyde*	C(CC=O)CC=O	100.12	820	2.08671	mol/kg
126	76-44-8	Heptachlor	C1=CC(C2C1C3(C(=C(C2(C3(Cl)Cl)Cl)Cl)Cl)Cl)Cl	373.3	2080	2.25399	mol/kg
127	79983-71-4	Hexaconazole	CCCCC(CN1C=NC=N1)(C2=C(C=C(C=C2)Cl)Cl)O	314.2	4060	1.88868	mol/kg
128*	86479-06-3*	Hexaflumuron*	C1=CC(=C(C(=C1)F)C(=O)NC(=O)NC2=CC(=C(C(=C2)Cl)OC(C(F)F)(F)F)Cl)F	461.1	2000	2.36277	mol/kg
129	78587-05-0	Hexythiazox	CC1C(SC(=O)N1C(=O)NC2CCCCC2)C3=CC=C(C=C3)Cl	352.9	2510	2.14798	mol/kg
130	67485-29-4	Hydramethylnon	CC1(CNC(=NC1)NN=C(C=CC2=CC=C(C=C2)C(F)(F)F)C=CC3=CC=C(C=C3)C(F)(F)F)C	494.5	2510	2.29449	mol/kg
131	7722-84-1	Hydrogen peroxide	OO	34.015	1049	1.51089	mol/kg
132	10004-44-1	Hymexazol	CC1=CC(=O)NO1	99.09	2000	1.695	mol/kg
133*	89318-82-1*	Imazamethabenz*	CC1=CC(=C(C=C1)C(=O)O)C2=NC(C(=O)N2)(C)C(C)C	274.31	2150	2.1058	mol/kg
134*	114311-32-9*	Imazamox*	CC(C)C1(C(=O)NC(=N1)C2=C(C=C(C=N2)COC)C(=O)O)C	305.33	1950	2.19473	mol/kg
135	122548-33-8	Imazosulfuron	COC1=CC(=NC(=N1)NC(=O)NS(=O)(=O)C2=C(N=C3N2C=CC=C3)Cl)OC	412.8	2250	2.26356	mol/kg
136	173584-44-6	Indoxacarb(DPX-MP062)	COC(=O)C12CC3=C(C1=NN(CO2)C(=O)N(C4=CC=C(C=C4)OC(F)(F)F)C(=O)OC)C=CC(=C3)Cl	527.8	720	2.86514	mol/kg
137*	36734-19-7*	Iprodione*	CC(C)NC(=O)N1CC(=O)N(C1=O)C2=CC(=CC(=C2)Cl)Cl	330.16	10437	1.50015	mol/kg
138	25311-71-1	Isofenphos	CCOP(=S)(NC(C)C)OC1=CC=CC=C1C(=O)OC(C)C	345.4	32	4.03317	mol/kg
139	163520-33-0	Isoxadifen-ethyl	CCOC(=O)C1=NOC(C1)(C2=CC=CC=C2)C3=CC=CC=C3	295.3	2000	2.16923	mol/kg
140	141112-29-0	Isoxaflutole	CS(=O)(=O)C1=C(C=CC(=C1)C(F)(F)F)C(=O)C2=C(ON=C2)C3CC3	359.3	2150	2.22302	mol/kg
141	6980-18-3	Kasugamycin	CC1C(CC(C(O1)OC2C(C(C(C(C2O)O)O)O)O)N)N=C(C(=O)O)N	379.36	2000	2.27802	mol/kg
142	143-50-0	Kepone	C1(=O)C2(C3(C4(C1(C5(C2(C3(C(C45Cl)(Cl)Cl)Cl)Cl)Cl)Cl)Cl)Cl)Cl	490.6	167	3.46801	mol/kg
143	76703-62-3	Lambda-Cyhalothrin	CC1(C(C1C(=O)OC(C#N)C2=CC(=CC=C2)OC3=CC=CC=C3)C=C(C(F)(F)F)Cl)C	449.8	3950	2.05642	mol/kg
144	319-84-6	Lindane	C1(C(C(C(C(C1Cl)Cl)Cl)Cl)Cl)Cl	290.8	2000	2.16256	mol/kg
145	103055-07-8	Lufenuron	C1=CC(=C(C(=C1)F)C(=O)NC(=O)NC2=CC(=C(C=C2Cl)OC(C(C(F)(F)F)F)(F)F)Cl)F	511.1	2000	2.40748	mol/kg
146	121-75-5	Malathion	CCOC(=O)CC(C(=O)OCC)SP(=S)(OC)OC	330.4	1485	2.34731	mol/kg
147	16484-77-8	MCPP acid	CC1=C(C=CC(=C1)Cl)OC(C)C(=O)O	214.64	486	2.64507	mol/kg
148*	208465-21-8*	Mesosulfuron methyl*	COC1=CC(=NC(=N1)NC(=O)NS(=O)(=O)C2=C(C=CC(=C2)CNS(=O)(=O)C)C(=O)OC)OC	503.5	2000	2.40097	mol/kg
149	57837-19-1	Metalaxyl	CC1=C(C(=CC=C1)C)N(C(C)C(=O)OC)C(=O)COC	279.33	1466	2.27998	mol/kg
150	108-62-3	Metaldehyde	CC1OC(OC(OC(O1)C)C)C	176.21	196	2.95377	mol/kg
151*	10265-92-6*	Methamidophos*	COP(=O)(N)SC	141.13	8.48	4.22122	mol/kg
152	950-37-8	Methidathion	COC1=NN(C(=O)S1)CSP(=S)(OC)OC	302.3	6.7	4.65436	mol/kg
153	2032-65-7	Methiocarb	CC1=CC(=CC(=C1SC)C)OC(=O)NC	225.31	7.1	4.50152	mol/kg
154	16752-77-5	Methomyl	CC(=NOC(=O)NC)SC	162.21	15.9	4.00868	mol/kg
155*	40596-69-8*	Methoprene*	CC(C)OC(=O)C=C(C)C=CCC(C)CCCC(C)(C)OC	310.5	2000	2.19103	mol/kg
156	72-43-5	Methoxychlor	COC1=CC=C(C=C1)C(C2=CC=C(C=C2)OC)C(Cl)(Cl)Cl	345.6	2000	2.23754	mol/kg
157	134-20-3	Methyl anthranilate	COC(=O)C1=CC=CC=C1N	151.16	292	2.71405	mol/kg
158	112-12-9	Methyl nonyl ketone	CCCCCCCCCC(=O)C	170.29	2250	1.87901	mol/kg
159	298-00-0	Methyl parathion	COP(=S)(OC)OC1=CC=C(C=C1)[N+](=O)[O-]	263.21	6.6	4.60076	mol/kg
160*	220899-03-6*	Metrafenone*	CC1=CC(=C(C(=C1C(=O)C2=C(C=CC(=C2C)Br)OC)OC)OC)OC	409.3	2025	2.30562	mol/kg
161*	443-48-1*	Metronidazole*	CC1=NC=C(N1CCO)[N+](=O)[O-]	171.15	5000	1.53441	mol/kg
162	74223-64-6	Metsulfuron methyl	CC1=NC(=NC(=N1)OC)NC(=O)NS(=O)(=O)C2=CC=CC=C2C(=O)OC	381.37	2510	2.18167	mol/kg
163	7786-34-7	Mevinphos	CC(=CC(=O)OC)OP(=O)(OC)OC	224.15	4.63	4.68496	mol/kg
164	51596-10-2	Milbemectin	CC1CCC2(CC3CC(O2)CC=C(CC(C=CC=C4COC5C4(C(C=C(C5O)C)C(=O)O3)O)C)C)OC1C	528.7	442	3.07779	mol/kg
165*	2385-85-5*	Mirex*	C12(C3(C4(C5(C3(C(C1(C5(C2(C4(Cl)Cl)Cl)Cl)Cl)(Cl)Cl)Cl)Cl)Cl)Cl)Cl	545.5	2400	2.35658	mol/kg
166	3567-25-7	Mitin FF	C1=CC(=C(C=C1NC(=O)NC2=C(C=CC(=C2)Cl)OC3=C(C=C(C=C3)Cl)S(=O)(=O)[O-])Cl)Cl.[Na+]	544.2	1806	2.47904	mol/kg
167	2212-67-1	Molinate	CCSC(=O)N1CCCCCC1	187.3	2250	1.92036	mol/kg
168	6923-22-4	Monocrotophos	CC(=CC(=O)NC)OP(=O)(OC)OC	223.16	4.76	4.67101	mol/kg
169	300-76-5	Naled	COP(=O)(OC)OC(C(Cl)(Cl)Br)Br	380.78	52.2	3.863	mol/kg
170	86-87-3	Naphthalene acetic acid	C1=CC=C2C(=C1)C=CC=C2CC(=O)O	186.21	1750	2.02696	mol/kg
171	15299-99-7	Napropamide	CCN(CC)C(=O)C(C)OC1=CC=CC2=CC=CC=C21	271.35	810	2.52504	mol/kg
172*	50-65-7*	Niclosamide Bayer 73*	C1=CC(=C(C=C1[N+](=O)[O-])Cl)NC(=O)C2=C(C=CC(=C2)Cl)O	327.12	2000	2.21368	mol/kg
173	1929-82-4	Nitrapyrin	C1=CC(=NC(=C1)Cl)C(Cl)(Cl)Cl	230.9	2510	1.96375	mol/kg
174*	112-05-0*	Nonanoic Acid*	CCCCCCCCC(=O)O	158.24	5620	1.44958	mol/kg
175	27314-13-2	Norflurazon	CNC1=C(C(=O)N(N=C1)C2=CC=CC(=C2)C(F)(F)F)Cl	303.67	1000	2.4824	mol/kg
176	116714-46-6	Novaluron	C1=CC(=C(C(=C1)F)C(=O)NC(=O)NC2=CC(=C(C=C2)OC(C(OC(F)(F)F)F)(F)F)Cl)F	492.7	2000	2.39155	mol/kg
177	26635-93-8	N-Polyethoxylated oleylamine Adocide mixture	CCCCCCCCC=CCCCCCCCCN(OCCO)OCCO	387.6	125	3.49147	mol/kg
178	90-43-7	Ortho-phenyl phenol	C1=CC=C(C=C1)C2=CC=CC=C2O	170.21	2250	1.8788	mol/kg
179*	213464-77-8*	Orthosulfamuron*	CN(C)C(=O)C1=CC=CC=C1NS(=O)(=O)NC(=O)NC2=NC(=CC(=N2)OC)OC	424.4	1960	2.33552	mol/kg
180	77732-09-3	Oxadixyl	CC1=C(C(=CC=C1)C)N(C(=O)COC)N2CCOC2=O	278.3	2510	2.04484	mol/kg
181*	5259-88-1*	Oxycarboxin*	CC1=C(S(=O)(=O)CCO1)C(=O)NC2=CC=CC=C2	267.3	1250	2.33009	mol/kg
182	301-12-2	Oxydemeton-methyl	CCS(=O)CCSP(=O)(OC)OC	246.3	53.9	3.65988	mol/kg
183	76738-62-0	Paclobutrazol	CC(C)(C)C(C(CC1=CC=C(C=C1)Cl)N2C=NC=N2)O	293.79	7913	1.5697	mol/kg
184	56-38-2	Parathion	CCOP(=S)(OCC)OC1=CC=C(C=C1)[N+](=O)[O-]	291.26	0.898	5.511	mol/kg
185	1114-71-2	Pebulate	CCCCN(CC)C(=O)SCCC	203.35	2000	2.00721	mol/kg
186	219714-96-2	Penoxsulam	COC1=CN=C(N2C1=NC(=N2)NS(=O)(=O)C3=C(C=CC=C3OCC(F)F)C(F)(F)F)OC	483.4	1900	2.40555	mol/kg
187	87-86-5	Pentachlorophenol	C1(=C(C(=C(C(=C1Cl)Cl)Cl)Cl)Cl)O	266.3	380	2.84559	mol/kg
188	52645-53-1	Permethrin	CC1(C(C1C(=O)OCC2=CC(=CC=C2)OC3=CC=CC=C3)C=C(Cl)Cl)C	391.3	2000	2.29148	mol/kg
189	85977-73-7	Phenyl-indole-3-thiobutyrate	C1=CC=C(C=C1)SC(=O)CCCC2=CNC3=CC=CC=C32	295.4	2250	2.11823	mol/kg
190	298-02-2	Phorate	CCOP(=S)(OCC)SCSCC	260.4	0.62	5.62325	mol/kg
191	732-11-6	Phosmet	COP(=S)(OC)SCN1C(=O)C2=CC=CC=C2C1=O	317.3	1830	2.23902	mol/kg
192*	13171-21-6*	Phosphamidon (canceled in the U.S.)*	CCN(CC)C(=O)C(=C(C)OP(=O)(OC)OC)Cl	299.69	3.81	4.89575	mol/kg
193	96182-53-5	Phostebupirim oxygen analog (Tebupirimphos)	CCOP(=S)(OC1=CN=C(N=C1)C(C)(C)C)OC(C)C	318.37	32.9	3.98574	mol/kg
194	1918_02_1	Picloram	C1(=C(C(=NC(=C1Cl)Cl)C(=O)O)Cl)N	241.5	2510	1.98324	mol/kg
195	23103-98-2	Pirimicarb	CC1=C(N=C(N=C1OC(=O)N(C)C)N(C)C)C	238.29	17.2	4.14158	mol/kg
196	52292-17-8	POE Isooctadecanol Arosurf 66-E2	CC(C)CCCCCCCCCCCCCCCOCCOCCO	358.6	2000	2.25358	mol/kg
197	23031-36-9	Prallethrin	CC1=C(C(=O)CC1OC(=O)C2C(C2(C)C)C=C(C)C)CC#C	300.4	1000	2.4777	mol/kg
198	86209-51-0	Primisulfuron-methyl	COC(=O)C1=CC=CC=C1S(=O)(=O)NC(=O)NC2=NC(=CC(=N2)OC(F)F)OC(F)F	468.3	2150	2.33809	mol/kg
199*	1610-18-0	Prometon*	CC(C)NC1=NC(=NC(=N1)OC)NC(C)C	225.29	3157	1.85347	mol/kg
200	2312-35-8	Propargite	CC(C)(C)C1=CC=C(C=C1)OC2CCCCC2OS(=O)OCC#C	350.5	4640	1.87817	mol/kg
201*	31218-83-4*	Propetamphos*	CCNP(=S)(OC)OC(=CC(=O)OC(C)C)C	281.31	197	3.15472	mol/kg
202*	60207-90-1*	Propiconazole*	CCCC1COC(O1)(CN2C=NC=N2)C3=C(C=C(C=C3)Cl)Cl	342.2	2510	2.13461	mol/kg
203*	114-26-1*	Propoxur*	CC(C)OC1=CC=CC=C1OC(=O)NC	209.24	9.44	4.34567	mol/kg
204*	94125-34-5*	Prosulfuron*	CC1=NC(=NC(=N1)OC)NC(=O)NS(=O)(=O)C2=CC=CC=C2CCC(F)(F)F	419.4	1094	2.58361	mol/kg
205	96489-71-3	Pyridaben	CC(C)(C)C1=CC=C(C=C1)CSC2=C(C(=O)N(N=C2)C(C)(C)C)Cl	364.9	2500	2.16423	mol/kg
206	95737-68-1	Pyriproxyfen	CC(COC1=CC=C(C=C1)OC2=CC=CC=C2)OC3=CC=CC=N3	321.4	2000	2.20602	mol/kg
207	422556-08-9	Pyroxsulam	COC1=CC(=NC2=NC(=NN12)NS(=O)(=O)C3=C(C=CN=C3OC)C(F)(F)F)OC	434.35	2030	2.33034	mol/kg
208	84087-01-4	Quinclorac	C1=CC(=C(C2=NC=C(C=C21)Cl)C(=O)O)Cl	242.05	1900	2.10515	mol/kg
209	76578-14-8	Quizalofop-ethyl	CCOC(=O)C(C)OC1=CC=C(C=C1)OC2=CN=C3C=C(C=CC3=N2)Cl	372.8	2000	2.27045	mol/kg
210*	122931-48-0*	Rimsulfuron*	CCS(=O)(=O)C1=C(N=CC=C1)S(=O)(=O)NC(=O)NC2=NC(=CC(=N2)OC)OC	431.4	2000	2.33385	mol/kg
211	83-79-4	Rotenone	CC(=C)C1CC2=C(O1)C=CC3=C2OC4COC5=CC(=C(C=C5C4C3=O)OC)OC	394.4	2200	2.25351	mol/kg
212	372137-35-4	Saflufenacil	CC(C)N(C)S(=O)(=O)NC(=O)C1=CC(=C(C=C1Cl)F)N2C(=O)C=C(N(C2=O)C)C(F)(F)F	500.9	2000	2.39872	mol/kg
213	74051-80-2	Sethoxydim	CCCC(=NOCC)C1=C(CC(CC1=O)CC(C)SCC)O	327.5	2510	2.11554	mol/kg
214*	87392-12-9	S-Metolachlor*	CCC1=CC=CC(=C1N(C(C)COC)C(=O)CCl)C	283.79	2510	2.05332	mol/kg
215	NA	Spinetoram	CCC1CCCC(C(C(=O)C2=CC3C(C2CC(=O)O1)CCC4C3CC(C4)OC5C(C(C(C(O5)C)OC)OCC)OC)C)OC6CCC(C(O6)C)N(C)C	748	2250	2.52172	mol/kg
216	NA	Spinosad	CCC1CCCC(C(C(=O)C2=CC3C4CC(CC4C=CC3C2CC(=O)O1)OC5C(C(C(C(O5)C)OC)OC)OC)C)OC6CCC(C(O6)C)N(C)C.CCC1CCCC(C(C(=O)C2=CC3C4CC(CC4C(=CC3C2CC(=O)O1)C)OC5C(C(C(C(O5)C)OC)OC)OC)C)OC6CCC(C(O6)C)N(C)C	1477.9	1333	3.04481	mol/kg
217*	74222-97-2*	Sulfometuron methyl*	CC1=CC(=NC(=N1)NC(=O)NS(=O)(=O)C2=CC=CC=C2C(=O)OC)C	364.4	5000	1.86261	mol/kg
218	141776-32-1	Sulfosulfuron	CCS(=O)(=O)C1=C(N2C=CC=CC2=N1)S(=O)(=O)NC(=O)NC3=NC(=CC(=N3)OC)OC	470.5	2250	2.32038	mol/kg
219	35400-43-2	Sulprofos	CCCSP(=S)(OCC)OC1=CC=C(C=C1)SC	322.5	72	3.6512	mol/kg
220	72-54-8	TDE	C1=CC(=CC=C1C(C2=CC=C(C=C2)Cl)C(Cl)Cl)Cl	320	2000	2.20412	mol/kg
221	34014-18-1	Tebuthiuron	CC(C)(C)C1=NN=C(S1)N(C)C(=O)NC	228.32	500	2.65957	mol/kg
222	79538-32-2	Tefluthrin	CC1=C(C(=C(C(=C1F)F)COC(=O)C2C(C2(C)C)C=C(C(F)(F)F)Cl)F)F	418.7	3960	2.02421	mol/kg
223	3383-96-8	Temephos	COP(=S)(OC)OC1=CC=C(C=C1)SC2=CC=C(C=C2)OP(=S)(OC)OC	466.5	79.4	3.76903	mol/kg
224	5915-41-3	Terbuthylazine	CCNC1=NC(=NC(=N1)Cl)NC(C)(C)C	229.71	2510	1.96151	mol/kg
225	22248-79-9	Tetrachlorvinphos	COP(=O)(OC)OC(=CCl)C1=CC(=C(C=C1Cl)Cl)Cl	366	2000	2.26245	mol/kg
226	79277-27-3	Thifensulfuron-methyl	CC1=NC(=NC(=N1)OC)NC(=O)NS(=O)(=O)C2=C(SC=C2)C(=O)OC	387.4	2510	2.18849	mol/kg
227*	137-26-8*	Thiram*	CN(C)C(=S)SSC(=S)N(C)C	240.4	2800	1.93378	mol/kg
228*	57018-04-9*	Tolclofos-methyl*	CC1=CC(=C(C(=C1)Cl)OP(=S)(OC)OC)Cl	301.13	5000	1.77978	mol/kg
229*	8001-35-2*	Toxaphene*	C=C1C(C2(C(C(C1(C2(Cl)Cl)Cl)Cl)Cl)Cl)(CCl)CCl	411.8	30.8	4.12614	mol/kg
230	87820-88-0	Tralkoxydim	CCC(=NOCC)C1=C(CC(CC1=O)C2=C(C=C(C=C2C)C)C)O	329.4	3020	2.03772	mol/kg
231	43121-43-3	Triadimefon	CC(C)(C)C(=O)C(N1C=NC=N1)OC2=CC=C(C=C2)Cl	293.75	4000	1.86592	mol/kg
232	82097-50-5	Triasulfuron	CC1=NC(=NC(=N1)OC)NC(=O)NS(=O)(=O)C2=CC=CC=C2OCCCl	401.8	2150	2.27157	mol/kg
233*	78-48-8*	Tribufos*	CCCCSP(=O)(SCCCC)SCCCC	314.5	871	2.5576	mol/kg
234	52-68-6	Trichlorfon	COP(=O)(C(C(Cl)(Cl)Cl)O)OC	257.43	36.8	3.84481	mol/kg
235	87-90-1	Trichloro-s-triazinetrione	C1(=O)N(C(=O)N(C(=O)N1Cl)Cl)Cl	232.41	1021	2.35723	mol/kg
236	55335-06-3	Triclopyr acid	C1=C(C(=NC(=C1Cl)Cl)OCC(=O)O)Cl	256.5	1698	2.17915	mol/kg
237	3380-34-5	Triclosan	C1=CC(=C(C=C1Cl)O)OC2=C(C=C(C=C2)Cl)Cl	289.5	2150	2.12921	mol/kg
238	18835-32-0	Tricosene	CCCCCCCCCCCCCCCCCCCCCC=C	322.6	4640	1.84215	mol/kg
239*	58138-08-2*	Tridiphane*	C1C(O1)(CC(Cl)(Cl)Cl)C2=CC(=CC(=C2)Cl)Cl	320.4	2510	2.10602	mol/kg
240*	141517-21-7*	Trifloxystrobin*	CC(=NOCC1=CC=CC=C1C(=NOC)C(=O)OC)C2=CC(=CC=C2)C(F)(F)F	408.4	2250	2.2589	mol/kg
241*	26644-46-2*	Triforine*	C1CN(CCN1C(C(Cl)(Cl)Cl)NC=O)C(C(Cl)(Cl)Cl)NC=O	435	2000	2.33746	mol/kg
242	2686-99-9	Trimethacarb	CC1=CC(=CC(=C1C)C)OC(=O)NC	193.24	14.1	4.13688	mol/kg
243	95266-40-3	Trinexapac-ethyl (Cimecticarb)	CCOC(=O)C1CC(=O)C(=C(C2CC2)O)C(=O)C1	252.26	2000	2.10082	mol/kg
244	131983-72-7	Triticonazole	CC1(CCC(=CC2=CC=C(C=C2)Cl)C1(CN3C=NC=N3)O)C	317.8	1900	2.2234	mol/kg
245	83657-22-1	Uniconazole	CC(C)(C)C(C(=CC1=CC=C(C=C1)Cl)N2C=NC=N2)O	291.77	2315	2.10049	mol/kg
246	1929-77-7	Vernolate	CCCN(CCC)C(=O)SCCC	203.35	4640	1.64173	mol/kg
247*	81-81-2*	Warfarin*	CC(=O)CC(C1=CC=CC=C1)C2=C(C3=CC=CC=C3OC2=O)O	308.3	580	2.72555	mol/kg
			*Test set compounds

## Sheet: ZF
sl no	CAS NO	Name	Canonical Smiles	MW	TOXICITY	pLD50	Unit
1	30560-19-1	Acephate	CC(=O)NP(=O)(OC)SC	183.17	86.9	3.32383	mol/kg
2	135410-20-7	Acetamiprid	CC(=NC#N)N(C)CC1=CN=C(C=C1)Cl	222.67	5.68	4.59331	mol/kg
3	67375-30-8	Alpha-cypermethrin	CC1(C(C1C(=O)OC(C#N)C2=CC(=CC=C2)OC3=CC=CC=C3)C=C(Cl)Cl)C	416.3	1370	2.48269	mol/kg
4	865318-97-4	Ametoctradin	CCCCCCCCC1=C(N2C(=NC=N2)N=C1CC)N	275.39	2000	2.13892	mol/kg
5*	25057-89-0*	Bentazon*	CC(C)N1C(=O)C2=CC=CC=C2NS1(=O)=O	240.28	281	2.93201	mol/kg
6*	500008-45-7*	Chlorantraniliprole*	CC1=CC(=CC(=C1NC(=O)C2=CC(=NN2C3=C(C=CC=N3)Cl)Br)C(=O)NC)Cl	483.1	2250	2.33185	mol/kg
7*	1897-45-6*	Chlorothalonil*	C(#N)C1=C(C(=C(C(=C1Cl)Cl)Cl)C#N)Cl	265.9	3500	1.88065	mol/kg
8	736994-63-1	Cyantraniliprole	CC1=CC(=CC(=C1NC(=O)C2=CC(=NN2C3=C(C=CC=N3)Cl)Br)C(=O)NC)C#N	473.7	2250	2.32332	mol/kg
9	180409-60-3	Cyflufenamid	C1CC1CON=C(C2=C(C=CC(=C2F)F)C(F)(F)F)NC(=O)CC3=CC=CC=C3	412.4	2000	2.31429	mol/kg
10*	400882-07-7*	Cyflumetofen*	CC(C)(C)C1=CC=C(C=C1)C(C#N)(C(=O)C2=CC=CC=C2C(F)(F)F)C(=O)OCCOC	447.4	2000	2.34967	mol/kg
11	57966-95-7	Cymoxanil	CCNC(=O)NC(=O)C(=NOC)C#N	198.18	2000	1.99603	mol/kg
12	1596-84-5	Daminozide	CN(C)NC(=O)CCC(=O)O	160.17	2250	1.8524	mol/kg
13	1918-00-9	Dicamba	COC1=C(C=CC(=C1C(=O)O)Cl)Cl	221.03	207	3.02848	mol/kg
14	62-73-7	Dichlorvos	COP(=O)(OC)OC=C(Cl)Cl	220.97	1.1	5.30294	mol/kg
15	165252-70-0	Dinotefuran	CN/C(=N/[N+](=O)[O-])/NCC1CCOC1	202.211	308	2.81725	mol/kg
16*	66230-04-4*	Esfenvalerate*	CC(C)C(C1=CC=C(C=C1)Cl)C(=O)OC(C#N)C2=CC(=CC=C2)OC3=CC=CC=C3	419.9	200	3.32212	mol/kg
17	162650-77-3	Ethaboxam	CCC1=C(SC(=N1)NCC)C(=O)NC(C#N)C2=CC=CS2	320.4	2000	2.20466	mol/kg
18	55283-68-6	Ethalfluralin	CCN(CC(=C)C)C1=C(C=C(C=C1[N+](=O)[O-])C(F)(F)F)[N+](=O)[O-]	333.26	2000	2.22175	mol/kg
19*	96-45-7*	Ethylenethiourea*	C1CNC(=S)N1	102.16	2000	1.70825	mol/kg
20	120928-09-8	Fenazaquin	CC(C)(C)C1=CC=C(C=C1)CCOC2=NC=NC3=CC=CC=C32	306.4	1592	2.28435	mol/kg
21	39515-41-8	Fenpropathrin	CC1(C(C1(C)C)C(=O)OC(C#N)C2=CC(=CC=C2)OC3=CC=CC=C3)C	349.4	70	3.69822	mol/kg
22	104040-78-0	Flazasulfuron	COC1=CC(=NC(=N1)NC(=O)NS(=O)(=O)C2=C(C=CC=N2)C(F)(F)F)OC	407.33	2000	2.30892	mol/kg
23	79622-59-6	Fluazinam	C1=C(C=NC(=C1Cl)NC2=C(C=C(C(=C2[N+](=O)[O-])Cl)C(F)(F)F)[N+](=O)[O-])C(F)(F)F	465.09	2000	2.36651	mol/kg
24	87547-04-4	Flumiclorac	C1CCC2=C(C1)C(=O)N(C2=O)C3=CC(=C(C=C3F)Cl)OCC(=O)O	353.73	2000	2.24764	mol/kg
25	239110-15-7	Fluopicolide	C1=CC(=C(C(=C1)Cl)C(=O)NCC2=C(C=C(C=N2)C(F)(F)F)Cl)Cl	383.6	2000	2.28285	mol/kg
26	907204-31-3	Fluxapyroxad	CN1C=C(C(=N1)C(F)F)C(=O)NC2=CC=CC=C2C3=CC(=C(C(=C3)F)F)F	381.3	2000	2.28024	mol/kg
27*	72178-02-0*	Fomesafen*	CS(=O)(=O)NC(=O)C1=C(C=CC(=C1)OC2=C(C=C(C=C2)C(F)(F)F)Cl)[N+](=O)[O-]	438.8	2000	2.34124	mol/kg
28	943831-98-9	Halauxifen methyl	COC1=C(C=CC(=C1F)C2=NC(=C(C(=C2)N)Cl)C(=O)OC)Cl	345.1	2250	2.18576	mol/kg
29	10004-44-1	Hymexazol	CC1=CC(=O)NO1	99.09	827	2.07852	mol/kg
30	173584-44-6	Indoxacarb	COC(=O)C12CC3=C(C1=NN(CO2)C(=O)N(C4=CC=C(C=C4)OC(F)(F)F)C(=O)OC)C=CC(=C3)Cl	527.8	315.5	3.22347	mol/kg
31	82558-50-7	Isoxaben	CCC(C)(CC)C1=NOC(=C1)NC(=O)C2=C(C=CC=C2OC)OC	332.4	2000	2.22063	mol/kg
32	6980-18-3	Kasugamycin	CC1C(CC(C(O1)OC2C(C(C(C(C2O)O)O)O)O)N)N=C(C(=O)O)N	379.36	2000	2.27802	mol/kg
33*	10265-92-6*	Methamidophos as an Acephate degradate*	COP(=O)(N)SC	141.13	10.7	4.12024	mol/kg
34	16752-77-5	Methomyl	C/C(=N\OC(=O)NC)/SC	162.21	2.03	4.90258	mol/kg
35	220899-03-6	Metrafenone	CC1=CC(=C(C(=C1C(=O)C2=C(C=CC(=C2C)Br)OC)OC)OC)OC	409.3	1950	2.32201	mol/kg
36	609346-29-4	Momfluorothrin	CC(=CC1C(C1(C)C)C(=O)OCC2=C(C(=C(C(=C2F)F)COC)F)F)C#N	385.4	2250	2.23373	mol/kg
37	300-76-5	Naled	COP(=O)(OC)OC(C(Cl)(Cl)Br)Br	380.78	11.4	4.52377	mol/kg
38	111991-09-4	Nicosulfuron	CN(C)C(=O)C1=C(N=CC=C1)S(=O)(=O)NC(=O)NC2=NC(=CC(=N2)OC)OC	410.4	2250	2.26102	mol/kg
39*	116714-46-6*	Novaluron*	C1=CC(=C(C(=C1)F)C(=O)NC(=O)NC2=CC(=C(C=C2)OC(C(OC(F)(F)F)F)(F)F)Cl)F	492.7	2250	2.3404	mol/kg
40*	23135-22-0*	Oxamyl*	CNC(=O)ON=C(C(=O)N(C)C)SC	219.26	0.918	5.37812	mol/kg
41*	1003318-67-9*	Oxathiapiprolin*	CC1=CC(=NN1CC(=O)N2CCC(CC2)C3=NC(=CS3)C4=NOC(C4)C5=C(C=CC=C5F)F)C(F)(F)F	539.5	2250	2.37981	mol/kg
42	298-02-2	Phorate	CCOP(=S)(OCC)SCSCC	260.4	2.57	5.00571	mol/kg
43	96182-53-5	Phostebupirim oxygen analog (Tebupirimphos)	CCOP(=S)(OC1=CN=C(N=C1)C(C)(C)C)OC(C)C	318.37	1.14	5.44603	mol/kg
44	117428-22-5	Picoxystrobin	COC=C(C1=CC=CC=C1COC2=CC=CC(=N2)C(F)(F)F)C(=O)OC	367.3	486	2.87838	mol/kg
45	447399-55-5	Pyroxasulfone	CC1(CC(=NO1)S(=O)(=O)CC2=C(N(N=C2C(F)(F)F)C)OC(F)F)C	391.32	2250	2.24035	mol/kg
46	372137-35-4	Saflufenacil	CC(C)N(C)S(=O)(=O)NC(=O)C1=CC(=C(C=C1Cl)F)N2C(=O)C=C(N(C2=O)C)C(F)(F)F	500.9	2000	2.39872	mol/kg
47	187166-40-1	Spinetoram	CCC1CCCC(C(C(=O)C2=CC3C(C2CC(=O)O1)CCC4C3CC(C4)OC5C(C(C(C(O5)C)OC)OCC)OC)C)OC6CCC(C(O6)C)N(C)C	748	2000	2.57287	mol/kg
48	131929-60-7	Spinosad	CCC1CCCC(C(C(=O)C2=CC3C4CC(CC4C=CC3C2CC(=O)O1)OC5C(C(C(C(O5)C)OC)OC)OC)C)OC6CCC(C(O6)C)N(C)C	732	800	2.96142	mol/kg
49*	69409-94-5*	Tau-Fluvalinate*	CC(C)C(C(=O)OC(C#N)C1=CC(=CC=C1)OC2=CC=CC=C2)NC3=C(C=C(C=C3)C(F)(F)F)Cl	502.9	2000	2.40045	mol/kg
50	210631-68-8	Topramezone	CC1=C(C=CC(=C1C2=NOCC2)S(=O)(=O)C)C(=O)C3=CNN(C3=O)C	363.4	2000	2.25935	mol/kg
51	101200-48-0	Tribenuron methyl	CC1=NC(=NC(=N1)OC)N(C)C(=O)NS(=O)(=O)C2=CC=CC=C2C(=O)OC	395.4	720	2.7397	mol/kg
52	78-48-8	Tribufos	CCCCSP(=O)(SCCCC)SCCCC	314.5	397	2.89883	mol/kg
53*	95266-40-3*	Trinexapac-ethyl*	CCOC(=O)C1CC(=O)C(=C(C2CC2)O)C(=O)C1	252.26	813	2.49176	mol/kg
			*Test set compounds

## Sheet: M1
No.	pLD50	P-117	F05[S-P]	nCXr	F09[C-P]	minssCH2	F04[Br-Br]	X2A
3	2.4899	0	0	0	0	0.71875	0	0.451184
7	1.95286	0	0	0	0	0	0	0.353553
9	1.71836	0	0	0	0	0.00694444	0	0.436504
16	2.7587	0	0	0	0	0	0	0.281206
18	1.99658	0	0	0	0	0	0	0.312896
19	2.57439	0	0	0	0	0.167558	0	0.372431
20	2.15686	0	0	0	0	0.715278	0	0.337132
26	1.82731	0	0	0	0	0	0	0.339675
34	2.01266	0	0	0	0	0.986241	0	0.286963
36	2.85063	0	0	0	0	0	0	0.312991
55	3.03497	0	0	0	0	0.415557	1	0.314763
61	2.14324	0	0	0	0	0.564534	0	0.287643
62	2.14555	0	0	0	0	0.589442	0	0.298425
94	2.83458	0	0	0	0	0	0	0.349684
102	2.12934	0	0	0	0	0.431343	0	0.341582
103	2.06027	0	0	0	0	0	0	0.284275
110	2.14341	0	0	0	0	0.767138	0	0.303753
120	1.87632	0	0	0	0	0	0	0.308457
136	1.87761	0	0	0	0	0.87774	0	0.341949
177	3.75611	0	0	0	0	0	0	0.298425
184	1.95701	0	0	0	0	-0.0412037	0	0.380045
185	1.92709	0	0	0	0	-0.597917	0	0.403895
240	2.63211	0	0	0	0	0	0	0.306497
265	3.07755	0	0	0	0	0	0	0.280261
268	2.38221	0	0	0	0	0	0	0.327998
286	3.38126	0	0	0	0	0.020907	0	0.311388
287	3.03544	0	0	0	0	0.444688	0	0.316633
290	2.05629	0	0	0	0	0	0	0.320726
321	2.55717	0	0	0	0	0.746351	0	0.296728
325	1.98366	0	0	0	0	0	0	0.309105
327	2.05744	0	0	0	0	0.0315741	0	0.344056
348	2.02829	0	0	0	0	0	0	0.301995
349	2.1425	0	0	0	0	0	0	0.286372
361	1.95615	0	0	0	0	0.906139	0	0.342842
54	5.09912	0	0	0	0	0	3	0.30002
129	2.52286	0	0	0	0	0.358001	0	0.294409
188	2.09556	0	0	0	0	0.722994	0	0.366521
227	2.22962	0	0	0	0	0.0668325	0	0.299157
249	2.21369	0	0	0	0	0	0	0.300867
264	2.36218	0	0	0	0	0	0	0.261763
298	2.21009	0	0	0	0	0.754756	0	0.307611
320	2.03091	0	0	0	0	0.787534	0	0.326544
45	2.45765	1	1	0	1	0.267058	0	0.329288
86	2.34975	0	0	0	0	-0.270798	0	0.29565
149	2.32381	0	0	0	0	0.263179	0	0.305762
164	2.19726	0	0	0	0	-0.245145	0	0.266311
215	2.16363	0	0	0	0	0.306305	0	0.29502
64	2.03924	0	0	0	0	0.679184	0	0.301937
142	2.17929	0	0	0	0	0.891139	0	0.289117
144	2.15879	0	0	0	0	0.314508	0	0.293979
146	2.25744	0	0	0	0	0.314508	0	0.293979
173	2.20863	0	0	0	0	0	0	0.313589
242	2.23372	0	0	0	0	-0.946579	0	0.281196
75	2.25522	0	0	0	0	0.239695	0	0.310916
171	2.26397	0	0	0	0	-0.437964	0	0.314105
219	2.14396	0	0	0	0	0.386231	0	0.293718
220	2.26262	0	0	0	0	0.0248325	0	0.302209
277	2.2129	0	0	0	0	-0.0947099	0	0.303227
299	2.33901	0	0	0	0	0.143372	0	0.317129
301	2.20602	0	0	0	0	0.439944	0	0.304508
350	2.62323	0	0	0	0	-0.3198	0	0.323165
28	2.02181	0	0	0	0	0	0	0.280796
35	2.04661	0	0	0	0	1.02945	0	0.280639
71	4.60033	1	0	0	0	0.35736	0	0.307125
100	2.09227	0	0	0	0	-0.939198	0	0.279917
114	4.2922	1	0	0	0	0.273272	0	0.326419
123	2.25146	0	0	0	0	-0.13037	0	0.306358
132	2.22181	0	0	0	0	0.0451831	0	0.315451
154	2.05915	0	0	0	0	-0.356126	0	0.320016
160	2.47021	0	0	0	0	-0.873149	0	0.320161
169	2.21661	0	0	0	0	0	0	0.293451
170	2.10558	0	0	0	0	-0.701158	0	0.310553
208	4.41062	1	0	0	0	0	0	0.301934
212	2.1895	0	0	0	0	0.552128	0	0.306867
225	2.19079	0	0	0	0	0	0	0.319796
261	3.74775	0	0	0	0	0	0	0.335139
284	2.19231	0	0	0	0	0.208655	0	0.306039
285	1.99796	0	0	0	0	0	0	0.332025
355	2.22443	0	0	0	0	0.264766	0	0.311057
358	2.90959	0	0	0	0	0	0	0.310539
2	2.41207	0	0	0	0	-0.01113	0	0.297309
27	3.74085	0	0	0	0	-0.03714	0	0.29763
63	1.95929	0	0	0	0	0	0	0.294558
78	1.98003	0	0	0	0	0.404699	0	0.293341
143	4.06998	1	0	0	0	0	0	0.303589
224	2.45451	0	0	0	0	-0.0881859	0	0.298177
233	1.87072	0	0	0	0	0	0	0.307938
237	4.54181	1	0	0	0	0	0	0.306669
260	2.14355	0	0	0	0	-0.0996485	0	0.288903
308	2.05338	0	0	0	0	-0.0222789	0	0.295308
331	2.1177	0	0	0	0	-0.667115	0	0.255762
41	3.98304	1	0	0	0	0.24566	0	0.284335
42	2.30473	0	0	0	0	0	0	0.288795
51	2.30571	0	0	0	0	0	0	0.286825
72	1.85468	0	0	0	0	0	0	0.304541
83	2.32336	0	0	0	0	0	0	0.283615
133	2.26109	0	0	0	0	0.275293	0	0.299401
153	2.30896	0	0	0	0	0	0	0.305335
167	2.36065	0	0	0	0	0.28559	0	0.284307
57	2.32437	0	0	0	0	-0.114893	0	0.298172
65	2.26295	0	0	0	0	-0.115287	0	0.291953
88	1.94494	0	0	0	0	0.377402	0	0.337589
192	2.36282	0	0	0	0	0	0	0.302726
195	2.12753	0	0	0	0	0	0	0.284634
199	2.1508	0	0	0	0	-0.355463	0	0.289515
217	2.40754	0	0	0	0	0	0	0.304865
228	2.3981	0	0	0	0	0.0245805	0	0.31204
254	2.39158	0	0	0	0	0	0	0.312075
255	2.42256	0	0	0	0	0	0	0.301005
276	4.1955	1	0	0	0	0.435446	0	0.325739
291	2.29022	0	0	0	0	-1.19875	0	0.315155
307	2.39872	0	0	0	0	0	0	0.296874
315	2.46365	0	0	0	0	-0.703206	0	0.279628
48	2.52006	0	0	0	0	-0.338104	0	0.287209
175	2.30185	0	0	0	0	0	0	0.30136
262	2.37987	0	0	0	0	-0.252407	0	0.283423
330	2.16824	0	0	0	0	-0.266249	0	0.278302
343	2.42316	0	0	0	0	0	0	0.290446
10	2.60875	0	0	0	0	0.441849	0	0.315704
11	2.20577	0	0	0	0	-0.198103	0	0.32894
15	1.92746	0	0	0	0	0.333831	0	0.382843
40	2.50805	0	0	0	0	-0.460802	0	0.242728
58	1.9273	0	0	0	0	0.387207	0	0.3789
69	2.87923	0	0	0	0	0	0	0.273541
81	5.18674	1	0	0	0	0.38359	0	0.289364
82	1.96223	0	0	0	0	0.548524	0	0.341447
106	1.88956	0	0	0	0	0	0	0.30247
135	3.4784	2	2	0	0	0.555581	0	0.324995
150	4.59335	1	0	0	0	0	0	0.297572
191	2.1469	0	0	0	0	0.578907	0	0.375383
211	2.05385	0	0	0	0	0.589024	0	0.381204
218	3.88963	1	0	0	0	-0.122569	0	0.32076
222	2.14318	0	0	0	0	-0.0610452	0	0.33552
238	2.20458	0	0	0	0	-0.882201	0	0.2782
239	2.30562	0	0	0	0	0	0	0.273552
241	2.43359	0	0	0	0	0.146491	0	0.274724
279	2.17736	0	0	0	0	0.304936	0	0.306732
282	2.40919	0	0	0	0	0.231197	0	0.288025
297	2.2701	0	0	0	0	0.198094	0	0.286755
312	2.26779	0	0	0	0	0.29158	0	0.292197
319	3.83642	1	0	0	0	0.594134	0	0.311449
324	4.23111	2	0	0	4	0	0	0.293666
363	2.02523	0	0	0	0	0.752534	0	0.37308
31	2.13901	0	0	0	0	0.887627	0	0.290307
37	3.61873	0	0	0	0	0	0	0.308743
67	2.39989	0	0	0	0	0.561666	0	0.325317
77	1.60661	0	0	0	0	0	0	0.284202
91	2.05177	0	0	0	0	1.26511	0	0.28906
99	4.7609	1	0	0	0	0.234505	0	0.315276
124	2.51804	0	0	0	0	0.790509	0	0.381204
131	2.20477	0	0	0	0	0.681418	0	0.289108
162	2.16014	0	0	0	0	0	0	0.287465
179	2.04174	0	0	0	0	0	0	0.313844
193	2.04965	0	0	0	0	0.90093	0	0.289427
200	2.17813	0	0	0	0	1.00022	0	0.289631
205	2.54044	0	0	0	0	0.508039	0	0.287411
229	2.58121	0	0	0	0	0.484381	0	0.28481
288	2.13467	0	0	0	0	0.383499	0	0.282838
292	2.19343	0	0	1	0	0.307265	0	0.278845
293	2.23589	0	0	1	0	0.264441	0	0.277704
314	2.73004	0	0	0	0	0.778173	0	0.298368
337	1.51921	0	0	0	0	0.700895	0	0.312855
354	2.13913	0	0	0	0	0.0735353	0	0.308695
6	2.86336	0	0	0	0	0.503472	0	0.451184
8	1.38101	0	0	0	0	1.27778	0	0.336504
13	1.94016	0	0	0	0	0.70162	0	0.304539
14	2.51168	0	0	0	0	0.317237	0	0.314677
21	2.7655	0	0	0	0	0	0	0.308276
24	1.96657	0	0	0	0	0	0	0.322733
46	2.02584	0	0	0	0	0.314055	0	0.307465
66	4.08544	1	0	0	0	0.334071	0	0.339093
70	2.18314	0	0	0	0	0	0	0.329106
74	1.83613	0	0	0	0	0.704962	0	0.383509
101	3.01002	0	0	0	0	0	0	0.30141
105	4.39987	1	0	0	0	0	0	0.34233
109	2.82814	0	0	2	0	0	0	0.254349
111	1.6737	0	0	0	0	0.0277778	0	0.412132
115	2.04107	0	0	0	0	0.601111	0	0.338314
116	2.20122	0	0	0	0	0	0	0.450524
122	4.47468	1	0	0	0	0.644046	0	0.341421
127	3.98281	0	0	4	0	-0.299059	0	0.255557
128	2.57096	0	0	0	0	0.672037	0	0.284569
134	2.12967	0	0	0	0	-0.227623	0	0.413833
183	2.18741	0	0	0	0	0.343534	0	0.243307
203	2.10346	0	0	0	0	0	0	0
204	3.39623	0	0	0	0	0	0	0
223	2.59456	0	0	0	0	0	0	0.321715
230	4.14536	1	0	0	0	0	0	0.358915
234	3.11294	0	0	0	0	0	0	0
245	1.67807	0	0	0	0	0	0	0.292077
246	1.87035	0	0	0	0	0.0846759	0	0.301446
251	1.84722	0	0	0	0	0.33941	0	0.395029
272	2.62814	0	0	0	0	0	0	0.286372
274	1.9626	0	0	0	0	0	0	0.450524
275	4.57058	1	0	0	0	0.63995	0	0.340555
289	1.58041	0	0	0	0	-0.138889	0	0.450524
326	4.00375	1	0	0	0	0.629427	0	0.353941
342	3.6827	0	0	6	0	0.0568673	0	0.236352
117	2.22919	0	0	0	0	0.686993	0	0.313743
161	2.25929	0	0	0	0	-0.534723	0	0.298855
263	1.8594	0	0	0	0	0.199731	0	0.305133
178	2.35459	0	0	0	0	0	0	0.299922
190	2.28617	0	0	0	0	0	0	0.293671
226	2.40103	0	0	0	0	-0.257493	0	0.30795
250	2.31224	0	0	0	0	0	0	0.300322
258	2.33561	0	0	0	0	0	0	0.30587
270	2.3779	0	0	0	0	-1.3229	0	0.292791
280	3.88278	1	0	0	0	0.821537	0	0.297571
303	2.31464	0	0	0	0	0	0	0.286502
318	2.32041	0	0	0	0	-0.38587	0	0.28722
336	2.30645	0	0	0	0	0	0	0.284254
338	2.24366	0	0	0	0	0	0	0.333055
347	2.2449	0	0	0	0	0	0	0.295402
356	2.34021	0	0	0	0	-1.70091	0	0.311191
32	2.00457	0	0	0	0	0.804517	0	0.322719
33	2.08927	0	0	0	0	0	0	0.31799
39	2.44853	0	0	0	0	0.751449	0	0.331253
60	2.34527	0	0	0	0	0	0	0.287255
80	2.09641	0	0	0	0	0.386806	0	0.329759
92	1.96905	0	0	0	0	1.15823	0	0.303475
93	1.93325	0	0	0	0	0.581481	0	0.282236
119	1.95371	0	0	0	0	0.646343	0	0.331274
159	2.09377	0	0	2	0	0	0	0.278475
172	2.19357	0	0	0	0	0	0	0.304062
174	2.57054	0	0	0	0	-0.0420975	0	0.284866
207	2.05166	0	0	0	0	1.21063	0	0.313742
300	1.99584	0	0	0	0	0	0	0.310629
328	3.45347	0	0	0	0	-0.681992	0	0.305517
332	1.9516	0	0	0	0	0	0	0.276393
333	2.10166	0	0	0	0	0.719923	0	0.300061
340	2.23966	0	0	0	0	0	0	0.32301
344	2.16699	0	0	0	0	0	0	0.30749
345	2.16997	0	0	0	0	0	0	0.30749
30	2.313	0	0	0	0	0	0	0.290627
47	2.33677	0	0	0	0	0	0	0.289216
95	2.3513	0	0	0	0	0	0	0.290627
130	3.04111	0	0	0	0	0	0	0.29663
138	2.22118	0	0	0	0	0	0	0.280384
158	2.21061	0	0	0	0	0	0	0.300968
295	2.28763	0	0	0	0	0.199066	0	0.287243
310	2.73972	0	0	0	0	0.201099	0	0.273674
339	3.64471	0	0	0	0	0.395449	0	0.290519
341	2.25939	0	0	0	0	0.355657	0	0.283694
353	2.31007	0	0	0	0	-0.0494013	0	0.303519
43	2.22443	0	0	0	0	0.201433	0	0.310243
52	2.23454	0	0	0	0	0	0	0.290204
96	3.22032	0	0	0	0	0.495703	0	0.2944
112	1.79337	0	0	0	0	0	0	0.304753
145	1.634	0	0	0	0	0.356713	0	0.314457
152	2.33962	0	0	0	0	0	0	0.295938
155	2.41665	0	0	0	0	0	0	0.304457
165	2.23168	0	0	0	0	-0.16929	0	0.303738
168	3.09496	0	0	0	0	-0.467163	0	0.312205
176	2.28027	0	0	0	0	0	0	0.288449
187	2.18585	0	0	0	0	0	0	0.280818
206	2.55028	0	0	0	0	-0.317937	0	0.299927
214	2.22308	0	0	0	0	0.820852	0	0.291891
253	2.48243	0	0	0	0	0	0	0.29411
259	2.83484	0	0	0	0	0.365319	0	0.311057
269	1.89962	0	0	0	0	1.021	0	0.298675
294	2.03595	0	0	0	0	0.405353	0	0.306226
296	2.25811	0	0	0	0	0	0	0.299956
302	2.24039	0	0	0	0	-1.25396	0	0.308081
316	2.23578	0	0	0	0	0	0	0.301946
317	3.04623	0	0	0	0	-1.33135	0	0.290337
322	2.22259	0	0	0	0	0.464507	0	0.298745
364	2.22616	0	0	0	0	-0.152748	0	0.294602
49	2.46401	0	0	0	0	0	0	0.307057
50	2.20177	0	0	0	0	0	0	0.297738
97	2.08316	0	0	0	0	0.279271	0	0.314097
198	3.22501	0	0	0	0	0.517701	0	0.310092
5	2.20437	0	0	0	0	0.855833	0	0.285276
126	3.98626	0	0	4	0	0.0107407	0	0.249746
53	2.06469	0	0	0	0	0.7485	0	0.293569
84	2.00081	0	0	0	0	0.871528	0	0.308009
121	2.26988	0	0	0	0	0.361911	0	0.314267
No.	pLD50	P-117	F05[S-P]	nCXr	F09[C-P]	minssCH2	F04[Br-Br]	X2A
4	2.38927	0	0	0	0	0	0	0.284202
17	2.22075	0	0	0	0	-0.0281019	0	0.310182
22	3.79764	0	0	0	0	0	0	0.342898
140	5.2779	1	0	0	0	0.332218	0	0.314902
76	2.38091	0	0	0	0	-0.112135	0	0.30638
107	2.36177	0	0	0	0	0	0	0.311129
209	4.59885	1	0	0	0	0.426196	0	0.322599
231	1.96374	0	0	0	0	0	0	0.284911
137	1.65718	0	0	0	0	0.984954	0	0.341376
186	2.15925	0	0	0	0	0.138819	0	0.315067
271	2.11811	0	0	0	0	0	0	0.291283
304	2.08289	0	0	0	0	0	0	0.292094
329	1.84488	0	0	0	0	0.853843	0	0.344465
156	2.53303	0	0	0	0	-0.408592	0	0.307859
256	2.74482	0	0	0	0	0.905382	0	0.326544
147	2.18119	0	0	0	0	1.06711	0	0.316477
232	2.21428	0	0	0	0	0	0	0.301082
163	2.27508	0	0	0	0	-0.409166	0	0.285803
213	2.22068	0	0	0	0	0.934277	0	0.279858
278	2.2505	0	0	0	0	0.438174	0	0.2839
59	2.1182	0	0	0	0	0.703701	0	0.314938
118	3.77859	0	0	0	0	0.616946	0	0.303828
157	1.70602	0	0	0	0	0.00925678	0	0.311057
201	1.97561	0	0	0	0	0.235622	0	0.303361
257	4.34656	1	0	0	0	0.0649383	0	0.326419
334	2.31644	0	0	0	0	-0.0231481	0	0.299857
29	2.24465	0	0	0	0	-0.03714	0	0.290564
180	4.42708	1	0	0	0	0.370197	0	0.301648
243	5.3737	1	0	0	0	0	0	0.328011
362	2.05687	0	0	0	0	0	0	0.283881
44	2.11075	0	0	0	0	0.568953	0	0.293231
108	2.25661	0	0	0	0	0.181526	0	0.286491
197	2.26361	0	0	0	0	0	0	0.288153
85	2.32527	0	0	0	0	-0.19368	0	0.299513
196	2.21859	0	0	0	0	0.260024	0	0.288263
248	2.12821	0	0	0	0	0	0	0.310523
283	2.33816	0	0	0	0	0	0	0.31196
357	2.33744	0	0	0	0	0.441667	0	0.318664
182	2.35207	0	0	0	0	0	0	0.293269
1	2.07996	0	0	0	0	0.552273	0	0.379476
25	2.64008	0	0	0	0	0.0316896	0	0.273245
73	2.1689	0	0	0	0	0	0	0.283163
125	2.145	0	0	0	0	0.262842	0	0.294406
210	1.92844	0	0	0	0	0.34841	0	0.38018
236	1.87911	0	0	0	0	0.785494	0	0.391258
252	2.19189	0	0	0	0	0.0692288	0	0.330427
311	2.31318	0	0	0	0	0.622968	0	0.280148
352	2.20776	0	0	0	0	1.30968	0	0.367501
56	2.18397	0	0	0	0	0.598194	0	0.307645
98	4.58034	1	0	0	0	0.442838	0	0.315276
139	2.19234	0	0	0	0	0	0	0.276632
194	2.43222	0	0	0	0	0.593228	0	0.312463
244	2.14887	0	0	0	0	0.728148	0	0.285088
309	2.4625	0	0	0	0	0.900794	0	0.27318
359	2.22347	0	0	0	0	0.416094	0	0.28481
12	2.14624	0	0	0	0	-0.167131	0	0.331793
23	1.84266	0	0	0	0	0	0	0.31359
68	2.72896	0	0	0	0	0.168971	0	0.289334
104	2.92559	0	0	0	0	0	0	0.321715
113	2.22567	0	0	0	0	0	0	0.312256
181	3.05326	0	0	0	0	0	0	0.319841
221	2.72605	0	0	0	0	-0.330881	0	0.330987
235	1.72548	0	0	0	0	0	0	0.5
267	1.96103	0	0	0	0	0	0	0.336504
281	1.41668	0	0	0	0	1.08333	0	0.5
351	2.54525	0	0	0	0	0	0	0.301875
216	2.26478	0	0	0	0	0.0397666	0	0.305567
202	2.51355	0	0	0	0	-0.553654	0	0.28131
266	2.25044	0	0	0	0	0.759073	0	0.289137
306	2.88486	0	0	0	0	-0.342406	0	0.297496
346	2.27165	0	0	0	0	0.11529	0	0.304849
38	2.13914	0	0	0	0	0	0	0.30613
90	3.28901	0	0	0	0	0.409027	0	0.279479
141	2.21907	0	0	0	0	0	0	0.280176
323	2.65965	0	0	0	0	0	0	0.31276
335	1.84329	0	0	0	0	0	0	0.311555
360	2.30045	0	0	0	0	0	0	0.30749
89	2.3184	0	0	0	0	0	0	0.290627
151	2.32215	0	0	0	0	0	0	0.29663
313	2.27125	0	0	0	0	0.213337	0	0.280194
79	2.22513	0	0	0	0	-0.133507	0	0.304712
148	2.21943	0	0	0	0	0.460751	0	0.286453
166	2.29748	0	0	0	0	-0.149693	0	0.31106
189	2.16744	0	0	0	0	0	0	0.307725
247	2.08141	0	0	0	0	0.706915	0	0.28743
273	2.20347	0	0	0	0	0.934601	0	0.307773
305	2.13657	0	0	0	0	0	0	0.288512
87	2.20098	0	0	0	0	0.380919	0	0.303806

## Sheet: M2
No.	pLD50	P-117	F05[S-P]	nCXr	F09[C-P]	F06[S-Cl]	F04[Br-Br]	X2A
3	2.4899	0	0	0	0	0	0	0.451184
7	1.95286	0	0	0	0	0	0	0.353553
9	1.71836	0	0	0	0	0	0	0.436504
16	2.7587	0	0	0	0	0	0	0.281206
18	1.99658	0	0	0	0	0	0	0.312896
19	2.57439	0	0	0	0	0	0	0.372431
20	2.15686	0	0	0	0	0	0	0.337132
26	1.82731	0	0	0	0	0	0	0.339675
34	2.01266	0	0	0	0	0	0	0.286963
36	2.85063	0	0	0	0	0	0	0.312991
55	3.03497	0	0	0	0	0	1	0.314763
61	2.14324	0	0	0	0	0	0	0.287643
62	2.14555	0	0	0	0	0	0	0.298425
94	2.83458	0	0	0	0	0	0	0.349684
102	2.12934	0	0	0	0	0	0	0.341582
103	2.06027	0	0	0	0	0	0	0.284275
110	2.14341	0	0	0	0	0	0	0.303753
120	1.87632	0	0	0	0	0	0	0.308457
136	1.87761	0	0	0	0	0	0	0.341949
177	3.75611	0	0	0	0	0	0	0.298425
184	1.95701	0	0	0	0	0	0	0.380045
185	1.92709	0	0	0	0	0	0	0.403895
240	2.63211	0	0	0	0	0	0	0.306497
265	3.07755	0	0	0	0	0	0	0.280261
268	2.38221	0	0	0	0	0	0	0.327998
286	3.38126	0	0	0	0	0	0	0.311388
287	3.03544	0	0	0	0	0	0	0.316633
290	2.05629	0	0	0	0	0	0	0.320726
321	2.55717	0	0	0	0	0	0	0.296728
325	1.98366	0	0	0	0	0	0	0.309105
327	2.05744	0	0	0	0	0	0	0.344056
348	2.02829	0	0	0	0	0	0	0.301995
349	2.1425	0	0	0	0	0	0	0.286372
361	1.95615	0	0	0	0	0	0	0.342842
54	5.09912	0	0	0	0	0	3	0.30002
129	2.52286	0	0	0	0	0	0	0.294409
188	2.09556	0	0	0	0	0	0	0.366521
227	2.22962	0	0	0	0	0	0	0.299157
249	2.21369	0	0	0	0	0	0	0.300867
264	2.36218	0	0	0	0	0	0	0.261763
298	2.21009	0	0	0	0	0	0	0.307611
320	2.03091	0	0	0	0	0	0	0.326544
45	2.45765	1	1	0	1	0	0	0.329288
86	2.34975	0	0	0	0	0	0	0.29565
149	2.32381	0	0	0	0	0	0	0.305762
164	2.19726	0	0	0	0	0	0	0.266311
215	2.16363	0	0	0	0	0	0	0.29502
64	2.03924	0	0	0	0	0	0	0.301937
142	2.17929	0	0	0	0	0	0	0.289117
144	2.15879	0	0	0	0	0	0	0.293979
146	2.25744	0	0	0	0	0	0	0.293979
173	2.20863	0	0	0	0	0	0	0.313589
242	2.23372	0	0	0	0	0	0	0.281196
75	2.25522	0	0	0	0	0	0	0.310916
171	2.26397	0	0	0	0	0	0	0.314105
219	2.14396	0	0	0	0	0	0	0.293718
220	2.26262	0	0	0	0	0	0	0.302209
277	2.2129	0	0	0	0	0	0	0.303227
299	2.33901	0	0	0	0	0	0	0.317129
301	2.20602	0	0	0	0	0	0	0.304508
350	2.62323	0	0	0	0	0	0	0.323165
28	2.02181	0	0	0	0	0	0	0.280796
35	2.04661	0	0	0	0	0	0	0.280639
71	4.60033	1	0	0	0	1	0	0.307125
100	2.09227	0	0	0	0	0	0	0.279917
114	4.2922	1	0	0	0	0	0	0.326419
123	2.25146	0	0	0	0	0	0	0.306358
132	2.22181	0	0	0	0	0	0	0.315451
154	2.05915	0	0	0	0	0	0	0.320016
160	2.47021	0	0	0	0	0	0	0.320161
169	2.21661	0	0	0	0	0	0	0.293451
170	2.10558	0	0	0	0	0	0	0.310553
208	4.41062	1	0	0	0	1	0	0.301934
212	2.1895	0	0	0	0	0	0	0.306867
225	2.19079	0	0	0	0	0	0	0.319796
261	3.74775	0	0	0	0	0	0	0.335139
284	2.19231	0	0	0	0	0	0	0.306039
285	1.99796	0	0	0	0	0	0	0.332025
355	2.22443	0	0	0	0	0	0	0.311057
358	2.90959	0	0	0	0	0	0	0.310539
2	2.41207	0	0	0	0	1	0	0.297309
27	3.74085	0	0	0	0	0	0	0.29763
63	1.95929	0	0	0	0	0	0	0.294558
78	1.98003	0	0	0	0	0	0	0.293341
143	4.06998	1	0	0	0	0	0	0.303589
224	2.45451	0	0	0	0	0	0	0.298177
233	1.87072	0	0	0	0	0	0	0.307938
237	4.54181	1	0	0	0	0	0	0.306669
260	2.14355	0	0	0	0	0	0	0.288903
308	2.05338	0	0	0	0	0	0	0.295308
331	2.1177	0	0	0	0	0	0	0.255762
41	3.98304	1	0	0	0	0	0	0.284335
42	2.30473	0	0	0	0	0	0	0.288795
51	2.30571	0	0	0	0	0	0	0.286825
72	1.85468	0	0	0	0	0	0	0.304541
83	2.32336	0	0	0	0	0	0	0.283615
133	2.26109	0	0	0	0	0	0	0.299401
153	2.30896	0	0	0	0	0	0	0.305335
167	2.36065	0	0	0	0	0	0	0.284307
57	2.32437	0	0	0	0	0	0	0.298172
65	2.26295	0	0	0	0	0	0	0.291953
88	1.94494	0	0	0	0	0	0	0.337589
192	2.36282	0	0	0	0	0	0	0.302726
195	2.12753	0	0	0	0	0	0	0.284634
199	2.1508	0	0	0	0	0	0	0.289515
217	2.40754	0	0	0	0	0	0	0.304865
228	2.3981	0	0	0	0	0	0	0.31204
254	2.39158	0	0	0	0	0	0	0.312075
255	2.42256	0	0	0	0	0	0	0.301005
276	4.1955	1	0	0	0	0	0	0.325739
291	2.29022	0	0	0	0	0	0	0.315155
307	2.39872	0	0	0	0	0	0	0.296874
315	2.46365	0	0	0	0	0	0	0.279628
48	2.52006	0	0	0	0	0	0	0.287209
175	2.30185	0	0	0	0	0	0	0.30136
262	2.37987	0	0	0	0	0	0	0.283423
330	2.16824	0	0	0	0	0	0	0.278302
343	2.42316	0	0	0	0	0	0	0.290446
10	2.60875	0	0	0	0	0	0	0.315704
11	2.20577	0	0	0	0	0	0	0.32894
15	1.92746	0	0	0	0	0	0	0.382843
40	2.50805	0	0	0	0	0	0	0.242728
58	1.9273	0	0	0	0	0	0	0.3789
69	2.87923	0	0	0	0	0	0	0.273541
81	5.18674	1	0	0	0	0	0	0.289364
82	1.96223	0	0	0	0	0	0	0.341447
106	1.88956	0	0	0	0	0	0	0.30247
135	3.4784	2	2	0	0	0	0	0.324995
150	4.59335	1	0	0	0	0	0	0.297572
191	2.1469	0	0	0	0	0	0	0.375383
211	2.05385	0	0	0	0	0	0	0.381204
218	3.88963	1	0	0	0	0	0	0.32076
222	2.14318	0	0	0	0	0	0	0.33552
238	2.20458	0	0	0	0	0	0	0.2782
239	2.30562	0	0	0	0	0	0	0.273552
241	2.43359	0	0	0	0	0	0	0.274724
279	2.17736	0	0	0	0	0	0	0.306732
282	2.40919	0	0	0	0	0	0	0.288025
297	2.2701	0	0	0	0	0	0	0.286755
312	2.26779	0	0	0	0	0	0	0.292197
319	3.83642	1	0	0	0	0	0	0.311449
324	4.23111	2	0	0	4	0	0	0.293666
363	2.02523	0	0	0	0	0	0	0.37308
31	2.13901	0	0	0	0	0	0	0.290307
37	3.61873	0	0	0	0	0	0	0.308743
67	2.39989	0	0	0	0	0	0	0.325317
77	1.60661	0	0	0	0	0	0	0.284202
91	2.05177	0	0	0	0	0	0	0.28906
99	4.7609	1	0	0	0	0	0	0.315276
124	2.51804	0	0	0	0	0	0	0.381204
131	2.20477	0	0	0	0	0	0	0.289108
162	2.16014	0	0	0	0	0	0	0.287465
179	2.04174	0	0	0	0	0	0	0.313844
193	2.04965	0	0	0	0	0	0	0.289427
200	2.17813	0	0	0	0	0	0	0.289631
205	2.54044	0	0	0	0	0	0	0.287411
229	2.58121	0	0	0	0	0	0	0.28481
288	2.13467	0	0	0	0	0	0	0.282838
292	2.19343	0	0	1	0	0	0	0.278845
293	2.23589	0	0	1	0	1	0	0.277704
314	2.73004	0	0	0	0	0	0	0.298368
337	1.51921	0	0	0	0	1	0	0.312855
354	2.13913	0	0	0	0	0	0	0.308695
6	2.86336	0	0	0	0	0	0	0.451184
8	1.38101	0	0	0	0	0	0	0.336504
13	1.94016	0	0	0	0	0	0	0.304539
14	2.51168	0	0	0	0	0	0	0.314677
21	2.7655	0	0	0	0	0	0	0.308276
24	1.96657	0	0	0	0	0	0	0.322733
46	2.02584	0	0	0	0	0	0	0.307465
66	4.08544	1	0	0	0	0	0	0.339093
70	2.18314	0	0	0	0	0	0	0.329106
74	1.83613	0	0	0	0	0	0	0.383509
101	3.01002	0	0	0	0	0	0	0.30141
105	4.39987	1	0	0	0	0	0	0.34233
109	2.82814	0	0	2	0	0	0	0.254349
111	1.6737	0	0	0	0	0	0	0.412132
115	2.04107	0	0	0	0	0	0	0.338314
116	2.20122	0	0	0	0	0	0	0.450524
122	4.47468	1	0	0	0	0	0	0.341421
127	3.98281	0	0	4	0	4	0	0.255557
128	2.57096	0	0	0	0	0	0	0.284569
134	2.12967	0	0	0	0	0	0	0.413833
183	2.18741	0	0	0	0	0	0	0.243307
203	2.10346	0	0	0	0	0	0	0
204	3.39623	0	0	0	0	0	0	0
223	2.59456	0	0	0	0	0	0	0.321715
230	4.14536	1	0	0	0	0	0	0.358915
234	3.11294	0	0	0	0	0	0	0
245	1.67807	0	0	0	0	0	0	0.292077
246	1.87035	0	0	0	0	0	0	0.301446
251	1.84722	0	0	0	0	0	0	0.395029
272	2.62814	0	0	0	0	0	0	0.286372
274	1.9626	0	0	0	0	0	0	0.450524
275	4.57058	1	0	0	0	0	0	0.340555
289	1.58041	0	0	0	0	0	0	0.450524
326	4.00375	1	0	0	0	0	0	0.353941
342	3.6827	0	0	6	0	0	0	0.236352
117	2.22919	0	0	0	0	0	0	0.313743
161	2.25929	0	0	0	0	0	0	0.298855
263	1.8594	0	0	0	0	0	0	0.305133
178	2.35459	0	0	0	0	0	0	0.299922
190	2.28617	0	0	0	0	0	0	0.293671
226	2.40103	0	0	0	0	0	0	0.30795
250	2.31224	0	0	0	0	0	0	0.300322
258	2.33561	0	0	0	0	0	0	0.30587
270	2.3779	0	0	0	0	0	0	0.292791
280	3.88278	1	0	0	0	0	0	0.297571
303	2.31464	0	0	0	0	0	0	0.286502
318	2.32041	0	0	0	0	0	0	0.28722
336	2.30645	0	0	0	0	0	0	0.284254
338	2.24366	0	0	0	0	0	0	0.333055
347	2.2449	0	0	0	0	0	0	0.295402
356	2.34021	0	0	0	0	0	0	0.311191
32	2.00457	0	0	0	0	0	0	0.322719
33	2.08927	0	0	0	0	0	0	0.31799
39	2.44853	0	0	0	0	0	0	0.331253
60	2.34527	0	0	0	0	0	0	0.287255
80	2.09641	0	0	0	0	0	0	0.329759
92	1.96905	0	0	0	0	0	0	0.303475
93	1.93325	0	0	0	0	0	0	0.282236
119	1.95371	0	0	0	0	0	0	0.331274
159	2.09377	0	0	2	0	0	0	0.278475
172	2.19357	0	0	0	0	0	0	0.304062
174	2.57054	0	0	0	0	0	0	0.284866
207	2.05166	0	0	0	0	0	0	0.313742
300	1.99584	0	0	0	0	0	0	0.310629
328	3.45347	0	0	0	0	0	0	0.305517
332	1.9516	0	0	0	0	0	0	0.276393
333	2.10166	0	0	0	0	0	0	0.300061
340	2.23966	0	0	0	0	0	0	0.32301
344	2.16699	0	0	0	0	0	0	0.30749
345	2.16997	0	0	0	0	0	0	0.30749
30	2.313	0	0	0	0	0	0	0.290627
47	2.33677	0	0	0	0	0	0	0.289216
95	2.3513	0	0	0	0	0	0	0.290627
130	3.04111	0	0	0	0	0	0	0.29663
138	2.22118	0	0	0	0	0	0	0.280384
158	2.21061	0	0	0	0	0	0	0.300968
295	2.28763	0	0	0	0	0	0	0.287243
310	2.73972	0	0	0	0	0	0	0.273674
339	3.64471	0	0	0	0	0	0	0.290519
341	2.25939	0	0	0	0	0	0	0.283694
353	2.31007	0	0	0	0	0	0	0.303519
43	2.22443	0	0	0	0	0	0	0.310243
52	2.23454	0	0	0	0	0	0	0.290204
96	3.22032	0	0	0	0	0	0	0.2944
112	1.79337	0	0	0	0	0	0	0.304753
145	1.634	0	0	0	0	0	0	0.314457
152	2.33962	0	0	0	0	2	0	0.295938
155	2.41665	0	0	0	0	0	0	0.304457
165	2.23168	0	0	0	0	0	0	0.303738
168	3.09496	0	0	0	0	0	0	0.312205
176	2.28027	0	0	0	0	0	0	0.288449
187	2.18585	0	0	0	0	0	0	0.280818
206	2.55028	0	0	0	0	0	0	0.299927
214	2.22308	0	0	0	0	0	0	0.291891
253	2.48243	0	0	0	0	0	0	0.29411
259	2.83484	0	0	0	0	0	0	0.311057
269	1.89962	0	0	0	0	0	0	0.298675
294	2.03595	0	0	0	0	0	0	0.306226
296	2.25811	0	0	0	0	0	0	0.299956
302	2.24039	0	0	0	0	0	0	0.308081
316	2.23578	0	0	0	0	1	0	0.301946
317	3.04623	0	0	0	0	0	0	0.290337
322	2.22259	0	0	0	0	0	0	0.298745
364	2.22616	0	0	0	0	0	0	0.294602
49	2.46401	0	0	0	0	0	0	0.307057
50	2.20177	0	0	0	0	0	0	0.297738
97	2.08316	0	0	0	0	0	0	0.314097
198	3.22501	0	0	0	0	0	0	0.310092
5	2.20437	0	0	0	0	0	0	0.285276
126	3.98626	0	0	4	0	4	0	0.249746
53	2.06469	0	0	0	0	0	0	0.293569
84	2.00081	0	0	0	0	0	0	0.308009
121	2.26988	0	0	0	0	0	0	0.314267
No.	pLD50	P-117	F05[S-P]	nCXr	F09[C-P]	F06[S-Cl]	F04[Br-Br]	X2A
4	2.38927	0	0	0	0	0	0	0.284202
17	2.22075	0	0	0	0	0	0	0.310182
22	3.79764	0	0	0	0	0	0	0.342898
140	5.2779	1	0	0	0	0	0	0.314902
76	2.38091	0	0	0	0	0	0	0.30638
107	2.36177	0	0	0	0	0	0	0.311129
209	4.59885	1	0	0	0	0	0	0.322599
231	1.96374	0	0	0	0	0	0	0.284911
137	1.65718	0	0	0	0	0	0	0.341376
186	2.15925	0	0	0	0	0	0	0.315067
271	2.11811	0	0	0	0	0	0	0.291283
304	2.08289	0	0	0	0	0	0	0.292094
329	1.84488	0	0	0	0	0	0	0.344465
156	2.53303	0	0	0	0	0	0	0.307859
256	2.74482	0	0	0	0	0	0	0.326544
147	2.18119	0	0	0	0	0	0	0.316477
232	2.21428	0	0	0	0	0	0	0.301082
163	2.27508	0	0	0	0	0	0	0.285803
213	2.22068	0	0	0	0	0	0	0.279858
278	2.2505	0	0	0	0	0	0	0.2839
59	2.1182	0	0	0	0	0	0	0.314938
118	3.77859	0	0	0	0	0	0	0.303828
157	1.70602	0	0	0	0	0	0	0.311057
201	1.97561	0	0	0	0	0	0	0.303361
257	4.34656	1	0	0	0	0	0	0.326419
334	2.31644	0	0	0	0	0	0	0.299857
29	2.24465	0	0	0	0	0	0	0.290564
180	4.42708	1	0	0	0	0	0	0.301648
243	5.3737	1	0	0	0	0	0	0.328011
362	2.05687	0	0	0	0	0	0	0.283881
44	2.11075	0	0	0	0	0	0	0.293231
108	2.25661	0	0	0	0	0	0	0.286491
197	2.26361	0	0	0	0	0	0	0.288153
85	2.32527	0	0	0	0	0	0	0.299513
196	2.21859	0	0	0	0	0	0	0.288263
248	2.12821	0	0	0	0	0	0	0.310523
283	2.33816	0	0	0	0	0	0	0.31196
357	2.33744	0	0	0	0	0	0	0.318664
182	2.35207	0	0	0	0	0	0	0.293269
1	2.07996	0	0	0	0	0	0	0.379476
25	2.64008	0	0	0	0	0	0	0.273245
73	2.1689	0	0	0	0	0	0	0.283163
125	2.145	0	0	0	0	0	0	0.294406
210	1.92844	0	0	0	0	0	0	0.38018
236	1.87911	0	0	0	0	0	0	0.391258
252	2.19189	0	0	0	0	0	0	0.330427
311	2.31318	0	0	0	0	0	0	0.280148
352	2.20776	0	0	0	0	0	0	0.367501
56	2.18397	0	0	0	0	0	0	0.307645
98	4.58034	1	0	0	0	0	0	0.315276
139	2.19234	0	0	0	0	0	0	0.276632
194	2.43222	0	0	0	0	0	0	0.312463
244	2.14887	0	0	0	0	0	0	0.285088
309	2.4625	0	0	0	0	0	0	0.27318
359	2.22347	0	0	0	0	0	0	0.28481
12	2.14624	0	0	0	0	0	0	0.331793
23	1.84266	0	0	0	0	0	0	0.31359
68	2.72896	0	0	0	0	0	0	0.289334
104	2.92559	0	0	0	0	0	0	0.321715
113	2.22567	0	0	0	0	0	0	0.312256
181	3.05326	0	0	0	0	0	0	0.319841
221	2.72605	0	0	0	0	0	0	0.330987
235	1.72548	0	0	0	0	0	0	0.5
267	1.96103	0	0	0	0	0	0	0.336504
281	1.41668	0	0	0	0	0	0	0.5
351	2.54525	0	0	0	0	0	0	0.301875
216	2.26478	0	0	0	0	0	0	0.305567
202	2.51355	0	0	0	0	0	0	0.28131
266	2.25044	0	0	0	0	0	0	0.289137
306	2.88486	0	0	0	0	0	0	0.297496
346	2.27165	0	0	0	0	1	0	0.304849
38	2.13914	0	0	0	0	0	0	0.30613
90	3.28901	0	0	0	0	0	0	0.279479
141	2.21907	0	0	0	0	0	0	0.280176
323	2.65965	0	0	0	0	0	0	0.31276
335	1.84329	0	0	0	0	0	0	0.311555
360	2.30045	0	0	0	0	0	0	0.30749
89	2.3184	0	0	0	0	0	0	0.290627
151	2.32215	0	0	0	0	0	0	0.29663
313	2.27125	0	0	0	0	0	0	0.280194
79	2.22513	0	0	0	0	0	0	0.304712
148	2.21943	0	0	0	0	0	0	0.286453
166	2.29748	0	0	0	0	0	0	0.31106
189	2.16744	0	0	0	0	0	0	0.307725
247	2.08141	0	0	0	0	0	0	0.28743
273	2.20347	0	0	0	0	0	0	0.307773
305	2.13657	0	0	0	0	0	0	0.288512
87	2.20098	0	0	0	0	0	0	0.303806

## Sheet: M3
No.	pLD50	P-117	F05[S-P]	nCXr	F09[C-P]	F04[Br-Br]	F02[O-O]	X2A
3	2.4899	0	0	0	0	0	0	0.451184
7	1.95286	0	0	0	0	0	0	0.353553
9	1.71836	0	0	0	0	0	0	0.436504
16	2.7587	0	0	0	0	0	0	0.281206
18	1.99658	0	0	0	0	0	0	0.312896
19	2.57439	0	0	0	0	0	1	0.372431
20	2.15686	0	0	0	0	0	0	0.337132
26	1.82731	0	0	0	0	0	0	0.339675
34	2.01266	0	0	0	0	0	1	0.286963
36	2.85063	0	0	0	0	0	1	0.312991
55	3.03497	0	0	0	0	1	1	0.314763
61	2.14324	0	0	0	0	0	0	0.287643
62	2.14555	0	0	0	0	0	0	0.298425
94	2.83458	0	0	0	0	0	0	0.349684
102	2.12934	0	0	0	0	0	0	0.341582
103	2.06027	0	0	0	0	0	0	0.284275
110	2.14341	0	0	0	0	0	0	0.303753
120	1.87632	0	0	0	0	0	0	0.308457
136	1.87761	0	0	0	0	0	0	0.341949
177	3.75611	0	0	0	0	0	0	0.298425
184	1.95701	0	0	0	0	0	2	0.380045
185	1.92709	0	0	0	0	0	4	0.403895
240	2.63211	0	0	0	0	0	0	0.306497
265	3.07755	0	0	0	0	0	0	0.280261
268	2.38221	0	0	0	0	0	1	0.327998
286	3.38126	0	0	0	0	0	0	0.311388
287	3.03544	0	0	0	0	0	0	0.316633
290	2.05629	0	0	0	0	0	0	0.320726
321	2.55717	0	0	0	0	0	0	0.296728
325	1.98366	0	0	0	0	0	0	0.309105
327	2.05744	0	0	0	0	0	0	0.344056
348	2.02829	0	0	0	0	0	0	0.301995
349	2.1425	0	0	0	0	0	0	0.286372
361	1.95615	0	0	0	0	0	0	0.342842
54	5.09912	0	0	0	0	3	2	0.30002
129	2.52286	0	0	0	0	0	9	0.294409
188	2.09556	0	0	0	0	0	0	0.366521
227	2.22962	0	0	0	0	0	2	0.299157
249	2.21369	0	0	0	0	0	1	0.300867
264	2.36218	0	0	0	0	0	0	0.261763
298	2.21009	0	0	0	0	0	0	0.307611
320	2.03091	0	0	0	0	0	0	0.326544
45	2.45765	1	1	0	1	0	2	0.329288
86	2.34975	0	0	0	0	0	1	0.29565
149	2.32381	0	0	0	0	0	1	0.305762
164	2.19726	0	0	0	0	0	0	0.266311
215	2.16363	0	0	0	0	0	1	0.29502
64	2.03924	0	0	0	0	0	0	0.301937
142	2.17929	0	0	0	0	0	0	0.289117
144	2.15879	0	0	0	0	0	2	0.293979
146	2.25744	0	0	0	0	0	2	0.293979
173	2.20863	0	0	0	0	0	0	0.313589
242	2.23372	0	0	0	0	0	1	0.281196
75	2.25522	0	0	0	0	0	0	0.310916
171	2.26397	0	0	0	0	0	1	0.314105
219	2.14396	0	0	0	0	0	0	0.293718
220	2.26262	0	0	0	0	0	0	0.302209
277	2.2129	0	0	0	0	0	1	0.303227
299	2.33901	0	0	0	0	0	0	0.317129
301	2.20602	0	0	0	0	0	0	0.304508
350	2.62323	0	0	0	0	0	1	0.323165
28	2.02181	0	0	0	0	0	0	0.280796
35	2.04661	0	0	0	0	0	1	0.280639
71	4.60033	1	0	0	0	0	3	0.307125
100	2.09227	0	0	0	0	0	0	0.279917
114	4.2922	1	0	0	0	0	1	0.326419
123	2.25146	0	0	0	0	0	0	0.306358
132	2.22181	0	0	0	0	0	2	0.315451
154	2.05915	0	0	0	0	0	0	0.320016
160	2.47021	0	0	0	0	0	1	0.320161
169	2.21661	0	0	0	0	0	0	0.293451
170	2.10558	0	0	0	0	0	1	0.310553
208	4.41062	1	0	0	0	0	3	0.301934
212	2.1895	0	0	0	0	0	2	0.306867
225	2.19079	0	0	0	0	0	1	0.319796
261	3.74775	0	0	0	0	0	1	0.335139
284	2.19231	0	0	0	0	0	2	0.306039
285	1.99796	0	0	0	0	0	0	0.332025
355	2.22443	0	0	0	0	0	2	0.311057
358	2.90959	0	0	0	0	0	1	0.310539
2	2.41207	0	0	0	0	0	0	0.297309
27	3.74085	0	0	0	0	0	0	0.29763
63	1.95929	0	0	0	0	0	1	0.294558
78	1.98003	0	0	0	0	0	0	0.293341
143	4.06998	1	0	0	0	0	4	0.303589
224	2.45451	0	0	0	0	0	1	0.298177
233	1.87072	0	0	0	0	0	1	0.307938
237	4.54181	1	0	0	0	0	4	0.306669
260	2.14355	0	0	0	0	0	1	0.288903
308	2.05338	0	0	0	0	0	0	0.295308
331	2.1177	0	0	0	0	0	0	0.255762
41	3.98304	1	0	0	0	0	1	0.284335
42	2.30473	0	0	0	0	0	1	0.288795
51	2.30571	0	0	0	0	0	6	0.286825
72	1.85468	0	0	0	0	0	1	0.304541
83	2.32336	0	0	0	0	0	0	0.283615
133	2.26109	0	0	0	0	0	2	0.299401
153	2.30896	0	0	0	0	0	1	0.305335
167	2.36065	0	0	0	0	0	0	0.284307
57	2.32437	0	0	0	0	0	2	0.298172
65	2.26295	0	0	0	0	0	1	0.291953
88	1.94494	0	0	0	0	0	0	0.337589
192	2.36282	0	0	0	0	0	0	0.302726
195	2.12753	0	0	0	0	0	1	0.284634
199	2.1508	0	0	0	0	0	1	0.289515
217	2.40754	0	0	0	0	0	0	0.304865
228	2.3981	0	0	0	0	0	0	0.31204
254	2.39158	0	0	0	0	0	0	0.312075
255	2.42256	0	0	0	0	0	0	0.301005
276	4.1955	1	0	0	0	0	3	0.325739
291	2.29022	0	0	0	0	0	1	0.315155
307	2.39872	0	0	0	0	0	1	0.296874
315	2.46365	0	0	0	0	0	2	0.279628
48	2.52006	0	0	0	0	0	0	0.287209
175	2.30185	0	0	0	0	0	1	0.30136
262	2.37987	0	0	0	0	0	0	0.283423
330	2.16824	0	0	0	0	0	1	0.278302
343	2.42316	0	0	0	0	0	1	0.290446
10	2.60875	0	0	0	0	0	1	0.315704
11	2.20577	0	0	0	0	0	1	0.32894
15	1.92746	0	0	0	0	0	0	0.382843
40	2.50805	0	0	0	0	0	6	0.242728
58	1.9273	0	0	0	0	0	0	0.3789
69	2.87923	0	0	0	0	0	0	0.273541
81	5.18674	1	0	0	0	0	4	0.289364
82	1.96223	0	0	0	0	0	1	0.341447
106	1.88956	0	0	0	0	0	1	0.30247
135	3.4784	2	2	0	0	0	2	0.324995
150	4.59335	1	0	0	0	0	3	0.297572
191	2.1469	0	0	0	0	0	1	0.375383
211	2.05385	0	0	0	0	0	1	0.381204
218	3.88963	1	0	0	0	0	3	0.32076
222	2.14318	0	0	0	0	0	1	0.33552
238	2.20458	0	0	0	0	0	1	0.2782
239	2.30562	0	0	0	0	0	0	0.273552
241	2.43359	0	0	0	0	0	2	0.274724
279	2.17736	0	0	0	0	0	1	0.306732
282	2.40919	0	0	0	0	0	1	0.288025
297	2.2701	0	0	0	0	0	2	0.286755
312	2.26779	0	0	0	0	0	2	0.292197
319	3.83642	1	0	0	0	0	1	0.311449
324	4.23111	2	0	0	4	0	6	0.293666
363	2.02523	0	0	0	0	0	0	0.37308
31	2.13901	0	0	0	0	0	0	0.290307
37	3.61873	0	0	0	0	0	0	0.308743
67	2.39989	0	0	0	0	0	0	0.325317
77	1.60661	0	0	0	0	0	0	0.284202
91	2.05177	0	0	0	0	0	0	0.28906
99	4.7609	1	0	0	0	0	6	0.315276
124	2.51804	0	0	0	0	0	0	0.381204
131	2.20477	0	0	0	0	0	0	0.289108
162	2.16014	0	0	0	0	0	1	0.287465
179	2.04174	0	0	0	0	0	0	0.313844
193	2.04965	0	0	0	0	0	0	0.289427
200	2.17813	0	0	0	0	0	0	0.289631
205	2.54044	0	0	0	0	0	0	0.287411
229	2.58121	0	0	0	0	0	0	0.28481
288	2.13467	0	0	0	0	0	1	0.282838
292	2.19343	0	0	1	0	0	0	0.278845
293	2.23589	0	0	1	0	0	0	0.277704
314	2.73004	0	0	0	0	0	1	0.298368
337	1.51921	0	0	0	0	0	0	0.312855
354	2.13913	0	0	0	0	0	0	0.308695
6	2.86336	0	0	0	0	0	0	0.451184
8	1.38101	0	0	0	0	0	0	0.336504
13	1.94016	0	0	0	0	0	0	0.304539
14	2.51168	0	0	0	0	0	0	0.314677
21	2.7655	0	0	0	0	0	0	0.308276
24	1.96657	0	0	0	0	0	0	0.322733
46	2.02584	0	0	0	0	0	1	0.307465
66	4.08544	1	0	0	0	0	3	0.339093
70	2.18314	0	0	0	0	0	1	0.329106
74	1.83613	0	0	0	0	0	0	0.383509
101	3.01002	0	0	0	0	0	1	0.30141
105	4.39987	1	0	0	0	0	6	0.34233
109	2.82814	0	0	2	0	0	0	0.254349
111	1.6737	0	0	0	0	0	0	0.412132
115	2.04107	0	0	0	0	0	3	0.338314
116	2.20122	0	0	0	0	0	0	0.450524
122	4.47468	1	0	0	0	0	1	0.341421
127	3.98281	0	0	4	0	0	6	0.255557
128	2.57096	0	0	0	0	0	2	0.284569
134	2.12967	0	0	0	0	0	3	0.413833
183	2.18741	0	0	0	0	0	2	0.243307
203	2.10346	0	0	0	0	0	0	0
204	3.39623	0	0	0	0	0	0	0
223	2.59456	0	0	0	0	0	1	0.321715
230	4.14536	1	0	0	0	0	1	0.358915
234	3.11294	0	0	0	0	0	0	0
245	1.67807	0	0	0	0	0	0	0.292077
246	1.87035	0	0	0	0	0	1	0.301446
251	1.84722	0	0	0	0	0	1	0.395029
272	2.62814	0	0	0	0	0	0	0.286372
274	1.9626	0	0	0	0	0	1	0.450524
275	4.57058	1	0	0	0	0	1	0.340555
289	1.58041	0	0	0	0	0	0	0.450524
326	4.00375	1	0	0	0	0	1	0.353941
342	3.6827	0	0	6	0	0	0	0.236352
117	2.22919	0	0	0	0	0	3	0.313743
161	2.25929	0	0	0	0	0	1	0.298855
263	1.8594	0	0	0	0	0	1	0.305133
178	2.35459	0	0	0	0	0	1	0.299922
190	2.28617	0	0	0	0	0	2	0.293671
226	2.40103	0	0	0	0	0	3	0.30795
250	2.31224	0	0	0	0	0	1	0.300322
258	2.33561	0	0	0	0	0	1	0.30587
270	2.3779	0	0	0	0	0	1	0.292791
280	3.88278	1	0	0	0	0	3	0.297571
303	2.31464	0	0	0	0	0	1	0.286502
318	2.32041	0	0	0	0	0	2	0.28722
336	2.30645	0	0	0	0	0	2	0.284254
338	2.24366	0	0	0	0	0	2	0.333055
347	2.2449	0	0	0	0	0	2	0.295402
356	2.34021	0	0	0	0	0	2	0.311191
32	2.00457	0	0	0	0	0	0	0.322719
33	2.08927	0	0	0	0	0	0	0.31799
39	2.44853	0	0	0	0	0	0	0.331253
60	2.34527	0	0	0	0	0	1	0.287255
80	2.09641	0	0	0	0	0	1	0.329759
92	1.96905	0	0	0	0	0	0	0.303475
93	1.93325	0	0	0	0	0	0	0.282236
119	1.95371	0	0	0	0	0	1	0.331274
159	2.09377	0	0	2	0	0	1	0.278475
172	2.19357	0	0	0	0	0	0	0.304062
174	2.57054	0	0	0	0	0	0	0.284866
207	2.05166	0	0	0	0	0	0	0.313742
300	1.99584	0	0	0	0	0	0	0.310629
328	3.45347	0	0	0	0	0	0	0.305517
332	1.9516	0	0	0	0	0	0	0.276393
333	2.10166	0	0	0	0	0	0	0.300061
340	2.23966	0	0	0	0	0	1	0.32301
344	2.16699	0	0	0	0	0	0	0.30749
345	2.16997	0	0	0	0	0	0	0.30749
30	2.313	0	0	0	0	0	1	0.290627
47	2.33677	0	0	0	0	0	1	0.289216
95	2.3513	0	0	0	0	0	1	0.290627
130	3.04111	0	0	0	0	0	1	0.29663
138	2.22118	0	0	0	0	0	1	0.280384
158	2.21061	0	0	0	0	0	1	0.300968
295	2.28763	0	0	0	0	0	1	0.287243
310	2.73972	0	0	0	0	0	3	0.273674
339	3.64471	0	0	0	0	0	0	0.290519
341	2.25939	0	0	0	0	0	1	0.283694
353	2.31007	0	0	0	0	0	1	0.303519
43	2.22443	0	0	0	0	0	2	0.310243
52	2.23454	0	0	0	0	0	0	0.290204
96	3.22032	0	0	0	0	0	0	0.2944
112	1.79337	0	0	0	0	0	0	0.304753
145	1.634	0	0	0	0	0	1	0.314457
152	2.33962	0	0	0	0	0	0	0.295938
155	2.41665	0	0	0	0	0	2	0.304457
165	2.23168	0	0	0	0	0	0	0.303738
168	3.09496	0	0	0	0	0	1	0.312205
176	2.28027	0	0	0	0	0	0	0.288449
187	2.18585	0	0	0	0	0	1	0.280818
206	2.55028	0	0	0	0	0	0	0.299927
214	2.22308	0	0	0	0	0	1	0.291891
253	2.48243	0	0	0	0	0	0	0.29411
259	2.83484	0	0	0	0	0	3	0.311057
269	1.89962	0	0	0	0	0	0	0.298675
294	2.03595	0	0	0	0	0	0	0.306226
296	2.25811	0	0	0	0	0	1	0.299956
302	2.24039	0	0	0	0	0	1	0.308081
316	2.23578	0	0	0	0	0	1	0.301946
317	3.04623	0	0	0	0	0	1	0.290337
322	2.22259	0	0	0	0	0	0	0.298745
364	2.22616	0	0	0	0	0	0	0.294602
49	2.46401	0	0	0	0	0	1	0.307057
50	2.20177	0	0	0	0	0	2	0.297738
97	2.08316	0	0	0	0	0	2	0.314097
198	3.22501	0	0	0	0	0	1	0.310092
5	2.20437	0	0	0	0	0	0	0.285276
126	3.98626	0	0	4	0	0	3	0.249746
53	2.06469	0	0	0	0	0	0	0.293569
84	2.00081	0	0	0	0	0	0	0.308009
121	2.26988	0	0	0	0	0	2	0.314267
No.	pLD50	P-117	F05[S-P]	nCXr	F09[C-P]	F04[Br-Br]	F02[O-O]	X2A
4	2.38927	0	0	0	0	0	0	0.284202
17	2.22075	0	0	0	0	0	0	0.310182
22	3.79764	0	0	0	0	0	0	0.342898
140	5.2779	1	0	0	0	0	3	0.314902
76	2.38091	0	0	0	0	0	1	0.30638
107	2.36177	0	0	0	0	0	1	0.311129
209	4.59885	1	0	0	0	0	2	0.322599
231	1.96374	0	0	0	0	0	1	0.284911
137	1.65718	0	0	0	0	0	0	0.341376
186	2.15925	0	0	0	0	0	0	0.315067
271	2.11811	0	0	0	0	0	1	0.291283
304	2.08289	0	0	0	0	0	1	0.292094
329	1.84488	0	0	0	0	0	1	0.344465
156	2.53303	0	0	0	0	0	1	0.307859
256	2.74482	0	0	0	0	0	0	0.326544
147	2.18119	0	0	0	0	0	0	0.316477
232	2.21428	0	0	0	0	0	0	0.301082
163	2.27508	0	0	0	0	0	1	0.285803
213	2.22068	0	0	0	0	0	0	0.279858
278	2.2505	0	0	0	0	0	1	0.2839
59	2.1182	0	0	0	0	0	2	0.314938
118	3.77859	0	0	0	0	0	2	0.303828
157	1.70602	0	0	0	0	0	2	0.311057
201	1.97561	0	0	0	0	0	1	0.303361
257	4.34656	1	0	0	0	0	3	0.326419
334	2.31644	0	0	0	0	0	1	0.299857
29	2.24465	0	0	0	0	0	0	0.290564
180	4.42708	1	0	0	0	0	1	0.301648
243	5.3737	1	0	0	0	0	6	0.328011
362	2.05687	0	0	0	0	0	1	0.283881
44	2.11075	0	0	0	0	0	1	0.293231
108	2.25661	0	0	0	0	0	1	0.286491
197	2.26361	0	0	0	0	0	1	0.288153
85	2.32527	0	0	0	0	0	0	0.299513
196	2.21859	0	0	0	0	0	1	0.288263
248	2.12821	0	0	0	0	0	2	0.310523
283	2.33816	0	0	0	0	0	2	0.31196
357	2.33744	0	0	0	0	0	0	0.318664
182	2.35207	0	0	0	0	0	1	0.293269
1	2.07996	0	0	0	0	0	1	0.379476
25	2.64008	0	0	0	0	0	4	0.273245
73	2.1689	0	0	0	0	0	2	0.283163
125	2.145	0	0	0	0	0	1	0.294406
210	1.92844	0	0	0	0	0	0	0.38018
236	1.87911	0	0	0	0	0	0	0.391258
252	2.19189	0	0	0	0	0	0	0.330427
311	2.31318	0	0	0	0	0	2	0.280148
352	2.20776	0	0	0	0	0	0	0.367501
56	2.18397	0	0	0	0	0	0	0.307645
98	4.58034	1	0	0	0	0	3	0.315276
139	2.19234	0	0	0	0	0	0	0.276632
194	2.43222	0	0	0	0	0	0	0.312463
244	2.14887	0	0	0	0	0	0	0.285088
309	2.4625	0	0	0	0	0	0	0.27318
359	2.22347	0	0	0	0	0	0	0.28481
12	2.14624	0	0	0	0	0	1	0.331793
23	1.84266	0	0	0	0	0	0	0.31359
68	2.72896	0	0	0	0	0	1	0.289334
104	2.92559	0	0	0	0	0	1	0.321715
113	2.22567	0	0	0	0	0	1	0.312256
181	3.05326	0	0	0	0	0	0	0.319841
221	2.72605	0	0	0	0	0	1	0.330987
235	1.72548	0	0	0	0	0	0	0.5
267	1.96103	0	0	0	0	0	0	0.336504
281	1.41668	0	0	0	0	0	0	0.5
351	2.54525	0	0	0	0	0	0	0.301875
216	2.26478	0	0	0	0	0	3	0.305567
202	2.51355	0	0	0	0	0	2	0.28131
266	2.25044	0	0	0	0	0	1	0.289137
306	2.88486	0	0	0	0	0	2	0.297496
346	2.27165	0	0	0	0	0	1	0.304849
38	2.13914	0	0	0	0	0	0	0.30613
90	3.28901	0	0	0	0	0	0	0.279479
141	2.21907	0	0	0	0	0	0	0.280176
323	2.65965	0	0	0	0	0	0	0.31276
335	1.84329	0	0	0	0	0	0	0.311555
360	2.30045	0	0	0	0	0	0	0.30749
89	2.3184	0	0	0	0	0	1	0.290627
151	2.32215	0	0	0	0	0	1	0.29663
313	2.27125	0	0	0	0	0	3	0.280194
79	2.22513	0	0	0	0	0	1	0.304712
148	2.21943	0	0	0	0	0	0	0.286453
166	2.29748	0	0	0	0	0	0	0.31106
189	2.16744	0	0	0	0	0	0	0.307725
247	2.08141	0	0	0	0	0	0	0.28743
273	2.20347	0	0	0	0	0	0	0.307773
305	2.13657	0	0	0	0	0	0	0.288512
87	2.20098	0	0	0	0	0	1	0.303806

## Sheet: M4
No.	pLD50	P-117	F05[S-P]	nCXr	F09[C-P]	F04[Br-Br]	X2A	X4v
3	2.4899	0	0	0	0	0	0.451184	0.117851
7	1.95286	0	0	0	0	0	0.353553	0.166667
9	1.71836	0	0	0	0	0	0.436504	0.144721
16	2.7587	0	0	0	0	0	0.281206	1.95096
18	1.99658	0	0	0	0	0	0.312896	0.968191
19	2.57439	0	0	0	0	0	0.372431	0.702871
20	2.15686	0	0	0	0	0	0.337132	0.603617
26	1.82731	0	0	0	0	0	0.339675	0.748027
34	2.01266	0	0	0	0	0	0.286963	1.23026
36	2.85063	0	0	0	0	0	0.312991	1.03797
55	3.03497	0	0	0	0	1	0.314763	2.93125
61	2.14324	0	0	0	0	0	0.287643	3.44831
62	2.14555	0	0	0	0	0	0.298425	3.24216
94	2.83458	0	0	0	0	0	0.349684	0.0550966
102	2.12934	0	0	0	0	0	0.341582	0.980193
103	2.06027	0	0	0	0	0	0.284275	1.19625
110	2.14341	0	0	0	0	0	0.303753	1.47149
120	1.87632	0	0	0	0	0	0.308457	1.20964
136	1.87761	0	0	0	0	0	0.341949	1.66107
177	3.75611	0	0	0	0	0	0.298425	2.54415
184	1.95701	0	0	0	0	0	0.380045	1.25935
185	1.92709	0	0	0	0	0	0.403895	0.711568
240	2.63211	0	0	0	0	0	0.306497	1.39674
265	3.07755	0	0	0	0	0	0.280261	3.20356
268	2.38221	0	0	0	0	0	0.327998	0.574349
286	3.38126	0	0	0	0	0	0.311388	1.51187
287	3.03544	0	0	0	0	0	0.316633	1.12135
290	2.05629	0	0	0	0	0	0.320726	1.60305
321	2.55717	0	0	0	0	0	0.296728	3.66675
325	1.98366	0	0	0	0	0	0.309105	1.36299
327	2.05744	0	0	0	0	0	0.344056	1.27324
348	2.02829	0	0	0	0	0	0.301995	0.756254
349	2.1425	0	0	0	0	0	0.286372	1.04634
361	1.95615	0	0	0	0	0	0.342842	1.85876
54	5.09912	0	0	0	0	3	0.30002	5.17494
129	2.52286	0	0	0	0	0	0.294409	7.79137
188	2.09556	0	0	0	0	0	0.366521	1.45694
227	2.22962	0	0	0	0	0	0.299157	3.09547
249	2.21369	0	0	0	0	0	0.300867	1.99287
264	2.36218	0	0	0	0	0	0.261763	5.59723
298	2.21009	0	0	0	0	0	0.307611	3.40102
320	2.03091	0	0	0	0	0	0.326544	2.02346
45	2.45765	1	1	0	1	0	0.329288	8.46807
86	2.34975	0	0	0	0	0	0.29565	3.1791
149	2.32381	0	0	0	0	0	0.305762	2.79904
164	2.19726	0	0	0	0	0	0.266311	3.60514
215	2.16363	0	0	0	0	0	0.29502	2.13542
64	2.03924	0	0	0	0	0	0.301937	2.25555
142	2.17929	0	0	0	0	0	0.289117	2.84003
144	2.15879	0	0	0	0	0	0.293979	2.28198
146	2.25744	0	0	0	0	0	0.293979	2.28198
173	2.20863	0	0	0	0	0	0.313589	2.04607
242	2.23372	0	0	0	0	0	0.281196	2.82866
75	2.25522	0	0	0	0	0	0.310916	3.82057
171	2.26397	0	0	0	0	0	0.314105	2.28524
219	2.14396	0	0	0	0	0	0.293718	2.44607
220	2.26262	0	0	0	0	0	0.302209	2.74719
277	2.2129	0	0	0	0	0	0.303227	2.16307
299	2.33901	0	0	0	0	0	0.317129	2.70414
301	2.20602	0	0	0	0	0	0.304508	2.09906
350	2.62323	0	0	0	0	0	0.323165	1.80602
28	2.02181	0	0	0	0	0	0.280796	2.20198
35	2.04661	0	0	0	0	0	0.280639	1.31679
71	4.60033	1	0	0	0	0	0.307125	3.59453
100	2.09227	0	0	0	0	0	0.279917	1.618
114	4.2922	1	0	0	0	0	0.326419	3.1023
123	2.25146	0	0	0	0	0	0.306358	3.13783
132	2.22181	0	0	0	0	0	0.315451	2.04499
154	2.05915	0	0	0	0	0	0.320016	1.03762
160	2.47021	0	0	0	0	0	0.320161	3.4351
169	2.21661	0	0	0	0	0	0.293451	2.59891
170	2.10558	0	0	0	0	0	0.310553	1.11215
208	4.41062	1	0	0	0	0	0.301934	1.98296
212	2.1895	0	0	0	0	0	0.306867	2.43626
225	2.19079	0	0	0	0	0	0.319796	2.11432
261	3.74775	0	0	0	0	0	0.335139	0.952464
284	2.19231	0	0	0	0	0	0.306039	2.40479
285	1.99796	0	0	0	0	0	0.332025	1.09329
355	2.22443	0	0	0	0	0	0.311057	2.24544
358	2.90959	0	0	0	0	0	0.310539	1.21295
2	2.41207	0	0	0	0	0	0.297309	2.86162
27	3.74085	0	0	0	0	0	0.29763	2.05149
63	1.95929	0	0	0	0	0	0.294558	1.15971
78	1.98003	0	0	0	0	0	0.293341	1.79152
143	4.06998	1	0	0	0	0	0.303589	2.09586
224	2.45451	0	0	0	0	0	0.298177	2.18897
233	1.87072	0	0	0	0	0	0.307938	0.792858
237	4.54181	1	0	0	0	0	0.306669	1.84314
260	2.14355	0	0	0	0	0	0.288903	2.27128
308	2.05338	0	0	0	0	0	0.295308	2.44952
331	2.1177	0	0	0	0	0	0.255762	2.33945
41	3.98304	1	0	0	0	0	0.284335	4.00199
42	2.30473	0	0	0	0	0	0.288795	2.5353
51	2.30571	0	0	0	0	0	0.286825	5.86117
72	1.85468	0	0	0	0	0	0.304541	2.99919
83	2.32336	0	0	0	0	0	0.283615	3.2946
133	2.26109	0	0	0	0	0	0.299401	3.10517
153	2.30896	0	0	0	0	0	0.305335	2.8518
167	2.36065	0	0	0	0	0	0.284307	2.85481
57	2.32437	0	0	0	0	0	0.298172	2.77559
65	2.26295	0	0	0	0	0	0.291953	2.72315
88	1.94494	0	0	0	0	0	0.337589	0.570994
192	2.36282	0	0	0	0	0	0.302726	2.51709
195	2.12753	0	0	0	0	0	0.284634	2.20587
199	2.1508	0	0	0	0	0	0.289515	2.70024
217	2.40754	0	0	0	0	0	0.304865	2.52852
228	2.3981	0	0	0	0	0	0.31204	2.98889
254	2.39158	0	0	0	0	0	0.312075	2.30203
255	2.42256	0	0	0	0	0	0.301005	2.70787
276	4.1955	1	0	0	0	0	0.325739	3.80687
291	2.29022	0	0	0	0	0	0.315155	3.33552
307	2.39872	0	0	0	0	0	0.296874	3.80346
315	2.46365	0	0	0	0	0	0.279628	5.07963
48	2.52006	0	0	0	0	0	0.287209	3.65148
175	2.30185	0	0	0	0	0	0.30136	3.433
262	2.37987	0	0	0	0	0	0.283423	5.52248
330	2.16824	0	0	0	0	0	0.278302	3.65831
343	2.42316	0	0	0	0	0	0.290446	5.17225
10	2.60875	0	0	0	0	0	0.315704	2.47783
11	2.20577	0	0	0	0	0	0.32894	1.79655
15	1.92746	0	0	0	0	0	0.382843	1.89254
40	2.50805	0	0	0	0	0	0.242728	12.4336
58	1.9273	0	0	0	0	0	0.3789	0.847334
69	2.87923	0	0	0	0	0	0.273541	3.71569
81	5.18674	1	0	0	0	0	0.289364	4.12018
82	1.96223	0	0	0	0	0	0.341447	1.21049
106	1.88956	0	0	0	0	0	0.30247	2.13647
135	3.4784	2	2	0	0	0	0.324995	13.7111
150	4.59335	1	0	0	0	0	0.297572	2.69901
191	2.1469	0	0	0	0	0	0.375383	1.91953
211	2.05385	0	0	0	0	0	0.381204	1.51285
218	3.88963	1	0	0	0	0	0.32076	4.95241
222	2.14318	0	0	0	0	0	0.33552	2.19719
238	2.20458	0	0	0	0	0	0.2782	2.7775
239	2.30562	0	0	0	0	0	0.273552	3.12984
241	2.43359	0	0	0	0	0	0.274724	7.22545
279	2.17736	0	0	0	0	0	0.306732	2.53095
282	2.40919	0	0	0	0	0	0.288025	3.07026
297	2.2701	0	0	0	0	0	0.286755	3.42638
312	2.26779	0	0	0	0	0	0.292197	4.38748
319	3.83642	1	0	0	0	0	0.311449	6.32732
324	4.23111	2	0	0	4	0	0.293666	4.51852
363	2.02523	0	0	0	0	0	0.37308	1.93142
31	2.13901	0	0	0	0	0	0.290307	2.59236
37	3.61873	0	0	0	0	0	0.308743	2.23683
67	2.39989	0	0	0	0	0	0.325317	2.95199
77	1.60661	0	0	0	0	0	0.284202	2.17051
91	2.05177	0	0	0	0	0	0.28906	1.80429
99	4.7609	1	0	0	0	0	0.315276	2.52257
124	2.51804	0	0	0	0	0	0.381204	1.8074
131	2.20477	0	0	0	0	0	0.289108	3.55902
162	2.16014	0	0	0	0	0	0.287465	2.68719
179	2.04174	0	0	0	0	0	0.313844	1.46904
193	2.04965	0	0	0	0	0	0.289427	2.59499
200	2.17813	0	0	0	0	0	0.289631	2.97193
205	2.54044	0	0	0	0	0	0.287411	4.22397
229	2.58121	0	0	0	0	0	0.28481	3.74927
288	2.13467	0	0	0	0	0	0.282838	3.21687
292	2.19343	0	0	1	0	0	0.278845	2.68967
293	2.23589	0	0	1	0	0	0.277704	2.9308
314	2.73004	0	0	0	0	0	0.298368	3.87513
337	1.51921	0	0	0	0	0	0.312855	2.34815
354	2.13913	0	0	0	0	0	0.308695	2.02809
6	2.86336	0	0	0	0	0	0.451184	0.303046
8	1.38101	0	0	0	0	0	0.336504	0
13	1.94016	0	0	0	0	0	0.304539	1.70615
14	2.51168	0	0	0	0	0	0.314677	1.04821
21	2.7655	0	0	0	0	0	0.308276	2.66018
24	1.96657	0	0	0	0	0	0.322733	0.746419
46	2.02584	0	0	0	0	0	0.307465	1.38069
66	4.08544	1	0	0	0	0	0.339093	3.46804
70	2.18314	0	0	0	0	0	0.329106	0.975118
74	1.83613	0	0	0	0	0	0.383509	0.938644
101	3.01002	0	0	0	0	0	0.30141	1.39635
105	4.39987	1	0	0	0	0	0.34233	1.03402
109	2.82814	0	0	2	0	0	0.254349	5.48876
111	1.6737	0	0	0	0	0	0.412132	0.231162
115	2.04107	0	0	0	0	0	0.338314	1.21609
116	2.20122	0	0	0	0	0	0.450524	0
122	4.47468	1	0	0	0	0	0.341421	6.64284
127	3.98281	0	0	4	0	0	0.255557	6.76556
128	2.57096	0	0	0	0	0	0.284569	2.3053
134	2.12967	0	0	0	0	0	0.413833	0.990866
183	2.18741	0	0	0	0	0	0.243307	7.13206
203	2.10346	0	0	0	0	0	0	0
204	3.39623	0	0	0	0	0	0	0
223	2.59456	0	0	0	0	0	0.321715	1.21256
230	4.14536	1	0	0	0	0	0.358915	0.67082
234	3.11294	0	0	0	0	0	0	0
245	1.67807	0	0	0	0	0	0.292077	1.13291
246	1.87035	0	0	0	0	0	0.301446	1.60956
251	1.84722	0	0	0	0	0	0.395029	1.05656
272	2.62814	0	0	0	0	0	0.286372	1.72172
274	1.9626	0	0	0	0	0	0.450524	0
275	4.57058	1	0	0	0	0	0.340555	7.65719
289	1.58041	0	0	0	0	0	0.450524	0
326	4.00375	1	0	0	0	0	0.353941	8.20346
342	3.6827	0	0	6	0	0	0.236352	7.54607
117	2.22919	0	0	0	0	0	0.313743	2.64183
161	2.25929	0	0	0	0	0	0.298855	2.33173
263	1.8594	0	0	0	0	0	0.305133	2.08591
178	2.35459	0	0	0	0	0	0.299922	3.42517
190	2.28617	0	0	0	0	0	0.293671	3.5907
226	2.40103	0	0	0	0	0	0.30795	3.94644
250	2.31224	0	0	0	0	0	0.300322	3.01131
258	2.33561	0	0	0	0	0	0.30587	2.9015
270	2.3779	0	0	0	0	0	0.292791	3.90551
280	3.88278	1	0	0	0	0	0.297571	2.33267
303	2.31464	0	0	0	0	0	0.286502	3.61154
318	2.32041	0	0	0	0	0	0.28722	5.16306
336	2.30645	0	0	0	0	0	0.284254	4.46968
338	2.24366	0	0	0	0	0	0.333055	1.43757
347	2.2449	0	0	0	0	0	0.295402	3.16914
356	2.34021	0	0	0	0	0	0.311191	3.72266
32	2.00457	0	0	0	0	0	0.322719	1.36322
33	2.08927	0	0	0	0	0	0.31799	1.29312
39	2.44853	0	0	0	0	0	0.331253	1.07011
60	2.34527	0	0	0	0	0	0.287255	1.81507
80	2.09641	0	0	0	0	0	0.329759	1.70918
92	1.96905	0	0	0	0	0	0.303475	0.800831
93	1.93325	0	0	0	0	0	0.282236	1.48308
119	1.95371	0	0	0	0	0	0.331274	1.24039
159	2.09377	0	0	2	0	0	0.278475	1.86041
172	2.19357	0	0	0	0	0	0.304062	2.23995
174	2.57054	0	0	0	0	0	0.284866	2.40301
207	2.05166	0	0	0	0	0	0.313742	1.58607
300	1.99584	0	0	0	0	0	0.310629	1.43243
328	3.45347	0	0	0	0	0	0.305517	2.46372
332	1.9516	0	0	0	0	0	0.276393	1.94025
333	2.10166	0	0	0	0	0	0.300061	2.49668
340	2.23966	0	0	0	0	0	0.32301	3.98615
344	2.16699	0	0	0	0	0	0.30749	1.70461
345	2.16997	0	0	0	0	0	0.30749	1.81822
30	2.313	0	0	0	0	0	0.290627	3.29991
47	2.33677	0	0	0	0	0	0.289216	3.31093
95	2.3513	0	0	0	0	0	0.290627	3.59801
130	3.04111	0	0	0	0	0	0.29663	3.31338
138	2.22118	0	0	0	0	0	0.280384	2.94642
158	2.21061	0	0	0	0	0	0.300968	3.37388
295	2.28763	0	0	0	0	0	0.287243	2.58465
310	2.73972	0	0	0	0	0	0.273674	10.3998
339	3.64471	0	0	0	0	0	0.290519	3.08961
341	2.25939	0	0	0	0	0	0.283694	3.80971
353	2.31007	0	0	0	0	0	0.303519	2.43347
43	2.22443	0	0	0	0	0	0.310243	2.1472
52	2.23454	0	0	0	0	0	0.290204	2.5495
96	3.22032	0	0	0	0	0	0.2944	3.37721
112	1.79337	0	0	0	0	0	0.304753	1.70191
145	1.634	0	0	0	0	0	0.314457	1.73263
152	2.33962	0	0	0	0	0	0.295938	3.3075
155	2.41665	0	0	0	0	0	0.304457	2.6179
165	2.23168	0	0	0	0	0	0.303738	2.52071
168	3.09496	0	0	0	0	0	0.312205	1.82911
176	2.28027	0	0	0	0	0	0.288449	2.5863
187	2.18585	0	0	0	0	0	0.280818	2.23358
206	2.55028	0	0	0	0	0	0.299927	2.42186
214	2.22308	0	0	0	0	0	0.291891	3.21516
253	2.48243	0	0	0	0	0	0.29411	1.8283
259	2.83484	0	0	0	0	0	0.311057	2.77275
269	1.89962	0	0	0	0	0	0.298675	2.94742
294	2.03595	0	0	0	0	0	0.306226	1.20683
296	2.25811	0	0	0	0	0	0.299956	3.1827
302	2.24039	0	0	0	0	0	0.308081	3.7105
316	2.23578	0	0	0	0	0	0.301946	2.97044
317	3.04623	0	0	0	0	0	0.290337	2.62587
322	2.22259	0	0	0	0	0	0.298745	2.79446
364	2.22616	0	0	0	0	0	0.294602	2.38388
49	2.46401	0	0	0	0	0	0.307057	1.97774
50	2.20177	0	0	0	0	0	0.297738	2.14332
97	2.08316	0	0	0	0	0	0.314097	1.69426
198	3.22501	0	0	0	0	0	0.310092	1.6824
5	2.20437	0	0	0	0	0	0.285276	2.49856
126	3.98626	0	0	4	0	0	0.249746	6.59889
53	2.06469	0	0	0	0	0	0.293569	1.50694
84	2.00081	0	0	0	0	0	0.308009	2.82641
121	2.26988	0	0	0	0	0	0.314267	1.18215
No.	pLD50	P-117	F05[S-P]	nCXr	F09[C-P]	F04[Br-Br]	X2A	X4v
4	2.38927	0	0	0	0	0	0.284202	1.62945
17	2.22075	0	0	0	0	0	0.310182	0.818112
22	3.79764	0	0	0	0	0	0.342898	0.363445
140	5.2779	1	0	0	0	0	0.314902	3.75109
76	2.38091	0	0	0	0	0	0.30638	1.80199
107	2.36177	0	0	0	0	0	0.311129	1.15187
209	4.59885	1	0	0	0	0	0.322599	4.45814
231	1.96374	0	0	0	0	0	0.284911	1.45955
137	1.65718	0	0	0	0	0	0.341376	0.618686
186	2.15925	0	0	0	0	0	0.315067	1.83122
271	2.11811	0	0	0	0	0	0.291283	2.02002
304	2.08289	0	0	0	0	0	0.292094	1.75337
329	1.84488	0	0	0	0	0	0.344465	1.56888
156	2.53303	0	0	0	0	0	0.307859	5.82762
256	2.74482	0	0	0	0	0	0.326544	2.21927
147	2.18119	0	0	0	0	0	0.316477	3.48198
232	2.21428	0	0	0	0	0	0.301082	2.99372
163	2.27508	0	0	0	0	0	0.285803	3.67997
213	2.22068	0	0	0	0	0	0.279858	2.48019
278	2.2505	0	0	0	0	0	0.2839	3.79662
59	2.1182	0	0	0	0	0	0.314938	1.82915
118	3.77859	0	0	0	0	0	0.303828	1.46581
157	1.70602	0	0	0	0	0	0.311057	2.28158
201	1.97561	0	0	0	0	0	0.303361	1.76852
257	4.34656	1	0	0	0	0	0.326419	2.62795
334	2.31644	0	0	0	0	0	0.299857	3.59946
29	2.24465	0	0	0	0	0	0.290564	2.16857
180	4.42708	1	0	0	0	0	0.301648	7.61303
243	5.3737	1	0	0	0	0	0.328011	1.31211
362	2.05687	0	0	0	0	0	0.283881	2.11012
44	2.11075	0	0	0	0	0	0.293231	1.90889
108	2.25661	0	0	0	0	0	0.286491	3.51466
197	2.26361	0	0	0	0	0	0.288153	3.70632
85	2.32527	0	0	0	0	0	0.299513	2.48075
196	2.21859	0	0	0	0	0	0.288263	2.15385
248	2.12821	0	0	0	0	0	0.310523	1.6264
283	2.33816	0	0	0	0	0	0.31196	3.15044
357	2.33744	0	0	0	0	0	0.318664	3.40257
182	2.35207	0	0	0	0	0	0.293269	3.28058
1	2.07996	0	0	0	0	0	0.379476	1.6953
25	2.64008	0	0	0	0	0	0.273245	10.5597
73	2.1689	0	0	0	0	0	0.283163	2.35551
125	2.145	0	0	0	0	0	0.294406	3.09533
210	1.92844	0	0	0	0	0	0.38018	1.19023
236	1.87911	0	0	0	0	0	0.391258	1.33105
252	2.19189	0	0	0	0	0	0.330427	2.20207
311	2.31318	0	0	0	0	0	0.280148	3.99404
352	2.20776	0	0	0	0	0	0.367501	3.20462
56	2.18397	0	0	0	0	0	0.307645	3.33715
98	4.58034	1	0	0	0	0	0.315276	3.38413
139	2.19234	0	0	0	0	0	0.276632	3.0067
194	2.43222	0	0	0	0	0	0.312463	2.97999
244	2.14887	0	0	0	0	0	0.285088	1.68073
309	2.4625	0	0	0	0	0	0.27318	4.71655
359	2.22347	0	0	0	0	0	0.28481	3.23751
12	2.14624	0	0	0	0	0	0.331793	1.4889
23	1.84266	0	0	0	0	0	0.31359	1.03215
68	2.72896	0	0	0	0	0	0.289334	2.27206
104	2.92559	0	0	0	0	0	0.321715	1.26468
113	2.22567	0	0	0	0	0	0.312256	3.31358
181	3.05326	0	0	0	0	0	0.319841	0.358319
221	2.72605	0	0	0	0	0	0.330987	1.14091
235	1.72548	0	0	0	0	0	0.5	0
267	1.96103	0	0	0	0	0	0.336504	0.681526
281	1.41668	0	0	0	0	0	0.5	0
351	2.54525	0	0	0	0	0	0.301875	1.86669
216	2.26478	0	0	0	0	0	0.305567	2.53913
202	2.51355	0	0	0	0	0	0.28131	4.06683
266	2.25044	0	0	0	0	0	0.289137	3.51773
306	2.88486	0	0	0	0	0	0.297496	4.48648
346	2.27165	0	0	0	0	0	0.304849	2.98025
38	2.13914	0	0	0	0	0	0.30613	1.61129
90	3.28901	0	0	0	0	0	0.279479	2.81394
141	2.21907	0	0	0	0	0	0.280176	2.80778
323	2.65965	0	0	0	0	0	0.31276	1.77096
335	1.84329	0	0	0	0	0	0.311555	1.43282
360	2.30045	0	0	0	0	0	0.30749	1.91132
89	2.3184	0	0	0	0	0	0.290627	3.29991
151	2.32215	0	0	0	0	0	0.29663	3.31338
313	2.27125	0	0	0	0	0	0.280194	3.98003
79	2.22513	0	0	0	0	0	0.304712	2.57971
148	2.21943	0	0	0	0	0	0.286453	3.05563
166	2.29748	0	0	0	0	0	0.31106	2.38402
189	2.16744	0	0	0	0	0	0.307725	2.12629
247	2.08141	0	0	0	0	0	0.28743	2.33171
273	2.20347	0	0	0	0	0	0.307773	3.59897
305	2.13657	0	0	0	0	0	0.288512	2.46481
87	2.20098	0	0	0	0	0	0.303806	2.05307

## Sheet: M5
No.	pLD50	P-117	F05[S-P]	nCXr	F09[C-P]	B02[N-N]	F04[Br-Br]	X2A
3	2.4899	0	0	0	0	0	0	0.451184
7	1.95286	0	0	0	0	1	0	0.353553
9	1.71836	0	0	0	0	0	0	0.436504
16	2.7587	0	0	0	0	0	0	0.281206
18	1.99658	0	0	0	0	0	0	0.312896
19	2.57439	0	0	0	0	0	0	0.372431
20	2.15686	0	0	0	0	0	0	0.337132
26	1.82731	0	0	0	0	0	0	0.339675
34	2.01266	0	0	0	0	1	0	0.286963
36	2.85063	0	0	0	0	0	0	0.312991
55	3.03497	0	0	0	0	0	1	0.314763
61	2.14324	0	0	0	0	0	0	0.287643
62	2.14555	0	0	0	0	0	0	0.298425
94	2.83458	0	0	0	0	0	0	0.349684
102	2.12934	0	0	0	0	0	0	0.341582
103	2.06027	0	0	0	0	1	0	0.284275
110	2.14341	0	0	0	0	0	0	0.303753
120	1.87632	0	0	0	0	0	0	0.308457
136	1.87761	0	0	0	0	0	0	0.341949
177	3.75611	0	0	0	0	0	0	0.298425
184	1.95701	0	0	0	0	0	0	0.380045
185	1.92709	0	0	0	0	0	0	0.403895
240	2.63211	0	0	0	0	1	0	0.306497
265	3.07755	0	0	0	0	0	0	0.280261
268	2.38221	0	0	0	0	0	0	0.327998
286	3.38126	0	0	0	0	0	0	0.311388
287	3.03544	0	0	0	0	0	0	0.316633
290	2.05629	0	0	0	0	0	0	0.320726
321	2.55717	0	0	0	0	0	0	0.296728
325	1.98366	0	0	0	0	1	0	0.309105
327	2.05744	0	0	0	0	0	0	0.344056
348	2.02829	0	0	0	0	1	0	0.301995
349	2.1425	0	0	0	0	1	0	0.286372
361	1.95615	0	0	0	0	0	0	0.342842
54	5.09912	0	0	0	0	0	3	0.30002
129	2.52286	0	0	0	0	0	0	0.294409
188	2.09556	0	0	0	0	0	0	0.366521
227	2.22962	0	0	0	0	0	0	0.299157
249	2.21369	0	0	0	0	0	0	0.300867
264	2.36218	0	0	0	0	0	0	0.261763
298	2.21009	0	0	0	0	0	0	0.307611
320	2.03091	0	0	0	0	0	0	0.326544
45	2.45765	1	1	0	1	0	0	0.329288
86	2.34975	0	0	0	0	0	0	0.29565
149	2.32381	0	0	0	0	0	0	0.305762
164	2.19726	0	0	0	0	0	0	0.266311
215	2.16363	0	0	0	0	0	0	0.29502
64	2.03924	0	0	0	0	0	0	0.301937
142	2.17929	0	0	0	0	0	0	0.289117
144	2.15879	0	0	0	0	0	0	0.293979
146	2.25744	0	0	0	0	0	0	0.293979
173	2.20863	0	0	0	0	0	0	0.313589
242	2.23372	0	0	0	0	0	0	0.281196
75	2.25522	0	0	0	0	0	0	0.310916
171	2.26397	0	0	0	0	0	0	0.314105
219	2.14396	0	0	0	0	0	0	0.293718
220	2.26262	0	0	0	0	0	0	0.302209
277	2.2129	0	0	0	0	0	0	0.303227
299	2.33901	0	0	0	0	0	0	0.317129
301	2.20602	0	0	0	0	0	0	0.304508
350	2.62323	0	0	0	0	0	0	0.323165
28	2.02181	0	0	0	0	0	0	0.280796
35	2.04661	0	0	0	0	1	0	0.280639
71	4.60033	1	0	0	0	0	0	0.307125
100	2.09227	0	0	0	0	1	0	0.279917
114	4.2922	1	0	0	0	0	0	0.326419
123	2.25146	0	0	0	0	0	0	0.306358
132	2.22181	0	0	0	0	0	0	0.315451
154	2.05915	0	0	0	0	0	0	0.320016
160	2.47021	0	0	0	0	0	0	0.320161
169	2.21661	0	0	0	0	0	0	0.293451
170	2.10558	0	0	0	0	0	0	0.310553
208	4.41062	1	0	0	0	1	0	0.301934
212	2.1895	0	0	0	0	0	0	0.306867
225	2.19079	0	0	0	0	0	0	0.319796
261	3.74775	0	0	0	0	0	0	0.335139
284	2.19231	0	0	0	0	0	0	0.306039
285	1.99796	0	0	0	0	1	0	0.332025
355	2.22443	0	0	0	0	0	0	0.311057
358	2.90959	0	0	0	0	0	0	0.310539
2	2.41207	0	0	0	0	0	0	0.297309
27	3.74085	0	0	0	0	0	0	0.29763
63	1.95929	0	0	0	0	1	0	0.294558
78	1.98003	0	0	0	0	0	0	0.293341
143	4.06998	1	0	0	0	0	0	0.303589
224	2.45451	0	0	0	0	0	0	0.298177
233	1.87072	0	0	0	0	0	0	0.307938
237	4.54181	1	0	0	0	0	0	0.306669
260	2.14355	0	0	0	0	0	0	0.288903
308	2.05338	0	0	0	0	0	0	0.295308
331	2.1177	0	0	0	0	1	0	0.255762
41	3.98304	1	0	0	0	1	0	0.284335
42	2.30473	0	0	0	0	1	0	0.288795
51	2.30571	0	0	0	0	1	0	0.286825
72	1.85468	0	0	0	0	1	0	0.304541
83	2.32336	0	0	0	0	1	0	0.283615
133	2.26109	0	0	0	0	1	0	0.299401
153	2.30896	0	0	0	0	1	0	0.305335
167	2.36065	0	0	0	0	1	0	0.284307
57	2.32437	0	0	0	0	1	0	0.298172
65	2.26295	0	0	0	0	1	0	0.291953
88	1.94494	0	0	0	0	1	0	0.337589
192	2.36282	0	0	0	0	1	0	0.302726
195	2.12753	0	0	0	0	1	0	0.284634
199	2.1508	0	0	0	0	1	0	0.289515
217	2.40754	0	0	0	0	1	0	0.304865
228	2.3981	0	0	0	0	1	0	0.31204
254	2.39158	0	0	0	0	1	0	0.312075
255	2.42256	0	0	0	0	1	0	0.301005
276	4.1955	1	0	0	0	1	0	0.325739
291	2.29022	0	0	0	0	1	0	0.315155
307	2.39872	0	0	0	0	1	0	0.296874
315	2.46365	0	0	0	0	1	0	0.279628
48	2.52006	0	0	0	0	0	0	0.287209
175	2.30185	0	0	0	0	0	0	0.30136
262	2.37987	0	0	0	0	0	0	0.283423
330	2.16824	0	0	0	0	0	0	0.278302
343	2.42316	0	0	0	0	0	0	0.290446
10	2.60875	0	0	0	0	0	0	0.315704
11	2.20577	0	0	0	0	0	0	0.32894
15	1.92746	0	0	0	0	0	0	0.382843
40	2.50805	0	0	0	0	0	0	0.242728
58	1.9273	0	0	0	0	0	0	0.3789
69	2.87923	0	0	0	0	0	0	0.273541
81	5.18674	1	0	0	0	0	0	0.289364
82	1.96223	0	0	0	0	0	0	0.341447
106	1.88956	0	0	0	0	0	0	0.30247
135	3.4784	2	2	0	0	0	0	0.324995
150	4.59335	1	0	0	0	0	0	0.297572
191	2.1469	0	0	0	0	0	0	0.375383
211	2.05385	0	0	0	0	0	0	0.381204
218	3.88963	1	0	0	0	0	0	0.32076
222	2.14318	0	0	0	0	0	0	0.33552
238	2.20458	0	0	0	0	0	0	0.2782
239	2.30562	0	0	0	0	0	0	0.273552
241	2.43359	0	0	0	0	0	0	0.274724
279	2.17736	0	0	0	0	0	0	0.306732
282	2.40919	0	0	0	0	0	0	0.288025
297	2.2701	0	0	0	0	0	0	0.286755
312	2.26779	0	0	0	0	0	0	0.292197
319	3.83642	1	0	0	0	0	0	0.311449
324	4.23111	2	0	0	4	0	0	0.293666
363	2.02523	0	0	0	0	0	0	0.37308
31	2.13901	0	0	0	0	1	0	0.290307
37	3.61873	0	0	0	0	1	0	0.308743
67	2.39989	0	0	0	0	1	0	0.325317
77	1.60661	0	0	0	0	1	0	0.284202
91	2.05177	0	0	0	0	1	0	0.28906
99	4.7609	1	0	0	0	1	0	0.315276
124	2.51804	0	0	0	0	1	0	0.381204
131	2.20477	0	0	0	0	1	0	0.289108
162	2.16014	0	0	0	0	1	0	0.287465
179	2.04174	0	0	0	0	1	0	0.313844
193	2.04965	0	0	0	0	1	0	0.289427
200	2.17813	0	0	0	0	1	0	0.289631
205	2.54044	0	0	0	0	1	0	0.287411
229	2.58121	0	0	0	0	1	0	0.28481
288	2.13467	0	0	0	0	1	0	0.282838
292	2.19343	0	0	1	0	1	0	0.278845
293	2.23589	0	0	1	0	1	0	0.277704
314	2.73004	0	0	0	0	0	0	0.298368
337	1.51921	0	0	0	0	0	0	0.312855
354	2.13913	0	0	0	0	1	0	0.308695
6	2.86336	0	0	0	0	0	0	0.451184
8	1.38101	0	0	0	0	0	0	0.336504
13	1.94016	0	0	0	0	0	0	0.304539
14	2.51168	0	0	0	0	0	0	0.314677
21	2.7655	0	0	0	0	0	0	0.308276
24	1.96657	0	0	0	0	0	0	0.322733
46	2.02584	0	0	0	0	0	0	0.307465
66	4.08544	1	0	0	0	0	0	0.339093
70	2.18314	0	0	0	0	0	0	0.329106
74	1.83613	0	0	0	0	0	0	0.383509
101	3.01002	0	0	0	0	0	0	0.30141
105	4.39987	1	0	0	0	0	0	0.34233
109	2.82814	0	0	2	0	0	0	0.254349
111	1.6737	0	0	0	0	0	0	0.412132
115	2.04107	0	0	0	0	0	0	0.338314
116	2.20122	0	0	0	0	0	0	0.450524
122	4.47468	1	0	0	0	0	0	0.341421
127	3.98281	0	0	4	0	0	0	0.255557
128	2.57096	0	0	0	0	0	0	0.284569
134	2.12967	0	0	0	0	0	0	0.413833
183	2.18741	0	0	0	0	0	0	0.243307
203	2.10346	0	0	0	0	0	0	0
204	3.39623	0	0	0	0	0	0	0
223	2.59456	0	0	0	0	0	0	0.321715
230	4.14536	1	0	0	0	0	0	0.358915
234	3.11294	0	0	0	0	0	0	0
245	1.67807	0	0	0	0	0	0	0.292077
246	1.87035	0	0	0	0	0	0	0.301446
251	1.84722	0	0	0	0	0	0	0.395029
272	2.62814	0	0	0	0	0	0	0.286372
274	1.9626	0	0	0	0	0	0	0.450524
275	4.57058	1	0	0	0	0	0	0.340555
289	1.58041	0	0	0	0	0	0	0.450524
326	4.00375	1	0	0	0	0	0	0.353941
342	3.6827	0	0	6	0	0	0	0.236352
117	2.22919	0	0	0	0	0	0	0.313743
161	2.25929	0	0	0	0	0	0	0.298855
263	1.8594	0	0	0	0	0	0	0.305133
178	2.35459	0	0	0	0	1	0	0.299922
190	2.28617	0	0	0	0	1	0	0.293671
226	2.40103	0	0	0	0	1	0	0.30795
250	2.31224	0	0	0	0	1	0	0.300322
258	2.33561	0	0	0	0	1	0	0.30587
270	2.3779	0	0	0	0	1	0	0.292791
280	3.88278	1	0	0	0	1	0	0.297571
303	2.31464	0	0	0	0	1	0	0.286502
318	2.32041	0	0	0	0	1	0	0.28722
336	2.30645	0	0	0	0	1	0	0.284254
338	2.24366	0	0	0	0	1	0	0.333055
347	2.2449	0	0	0	0	1	0	0.295402
356	2.34021	0	0	0	0	1	0	0.311191
32	2.00457	0	0	0	0	1	0	0.322719
33	2.08927	0	0	0	0	1	0	0.31799
39	2.44853	0	0	0	0	1	0	0.331253
60	2.34527	0	0	0	0	1	0	0.287255
80	2.09641	0	0	0	0	1	0	0.329759
92	1.96905	0	0	0	0	1	0	0.303475
93	1.93325	0	0	0	0	1	0	0.282236
119	1.95371	0	0	0	0	1	0	0.331274
159	2.09377	0	0	2	0	0	0	0.278475
172	2.19357	0	0	0	0	1	0	0.304062
174	2.57054	0	0	0	0	1	0	0.284866
207	2.05166	0	0	0	0	1	0	0.313742
300	1.99584	0	0	0	0	1	0	0.310629
328	3.45347	0	0	0	0	1	0	0.305517
332	1.9516	0	0	0	0	1	0	0.276393
333	2.10166	0	0	0	0	1	0	0.300061
340	2.23966	0	0	0	0	1	0	0.32301
344	2.16699	0	0	0	0	1	0	0.30749
345	2.16997	0	0	0	0	1	0	0.30749
30	2.313	0	0	0	0	0	0	0.290627
47	2.33677	0	0	0	0	0	0	0.289216
95	2.3513	0	0	0	0	0	0	0.290627
130	3.04111	0	0	0	0	0	0	0.29663
138	2.22118	0	0	0	0	0	0	0.280384
158	2.21061	0	0	0	0	0	0	0.300968
295	2.28763	0	0	0	0	0	0	0.287243
310	2.73972	0	0	0	0	0	0	0.273674
339	3.64471	0	0	0	0	0	0	0.290519
341	2.25939	0	0	0	0	0	0	0.283694
353	2.31007	0	0	0	0	0	0	0.303519
43	2.22443	0	0	0	0	0	0	0.310243
52	2.23454	0	0	0	0	0	0	0.290204
96	3.22032	0	0	0	0	0	0	0.2944
112	1.79337	0	0	0	0	1	0	0.304753
145	1.634	0	0	0	0	0	0	0.314457
152	2.33962	0	0	0	0	1	0	0.295938
155	2.41665	0	0	0	0	1	0	0.304457
165	2.23168	0	0	0	0	0	0	0.303738
168	3.09496	0	0	0	0	0	0	0.312205
176	2.28027	0	0	0	0	0	0	0.288449
187	2.18585	0	0	0	0	0	0	0.280818
206	2.55028	0	0	0	0	1	0	0.299927
214	2.22308	0	0	0	0	0	0	0.291891
253	2.48243	0	0	0	0	0	0	0.29411
259	2.83484	0	0	0	0	0	0	0.311057
269	1.89962	0	0	0	0	0	0	0.298675
294	2.03595	0	0	0	0	1	0	0.306226
296	2.25811	0	0	0	0	0	0	0.299956
302	2.24039	0	0	0	0	0	0	0.308081
316	2.23578	0	0	0	0	1	0	0.301946
317	3.04623	0	0	0	0	0	0	0.290337
322	2.22259	0	0	0	0	0	0	0.298745
364	2.22616	0	0	0	0	0	0	0.294602
49	2.46401	0	0	0	0	0	0	0.307057
50	2.20177	0	0	0	0	0	0	0.297738
97	2.08316	0	0	0	0	0	0	0.314097
198	3.22501	0	0	0	0	1	0	0.310092
5	2.20437	0	0	0	0	0	0	0.285276
126	3.98626	0	0	4	0	0	0	0.249746
53	2.06469	0	0	0	0	1	0	0.293569
84	2.00081	0	0	0	0	0	0	0.308009
121	2.26988	0	0	0	0	0	0	0.314267
No.	pLD50	P-117	F05[S-P]	nCXr	F09[C-P]	B02[N-N]	F04[Br-Br]	X2A
4	2.38927	0	0	0	0	0	0	0.284202
17	2.22075	0	0	0	0	0	0	0.310182
22	3.79764	0	0	0	0	0	0	0.342898
140	5.2779	1	0	0	0	0	0	0.314902
76	2.38091	0	0	0	0	0	0	0.30638
107	2.36177	0	0	0	0	0	0	0.311129
209	4.59885	1	0	0	0	0	0	0.322599
231	1.96374	0	0	0	0	1	0	0.284911
137	1.65718	0	0	0	0	1	0	0.341376
186	2.15925	0	0	0	0	1	0	0.315067
271	2.11811	0	0	0	0	0	0	0.291283
304	2.08289	0	0	0	0	0	0	0.292094
329	1.84488	0	0	0	0	0	0	0.344465
156	2.53303	0	0	0	0	0	0	0.307859
256	2.74482	0	0	0	0	0	0	0.326544
147	2.18119	0	0	0	0	0	0	0.316477
232	2.21428	0	0	0	0	0	0	0.301082
163	2.27508	0	0	0	0	0	0	0.285803
213	2.22068	0	0	0	0	0	0	0.279858
278	2.2505	0	0	0	0	0	0	0.2839
59	2.1182	0	0	0	0	0	0	0.314938
118	3.77859	0	0	0	0	0	0	0.303828
157	1.70602	0	0	0	0	0	0	0.311057
201	1.97561	0	0	0	0	0	0	0.303361
257	4.34656	1	0	0	0	0	0	0.326419
334	2.31644	0	0	0	0	0	0	0.299857
29	2.24465	0	0	0	0	0	0	0.290564
180	4.42708	1	0	0	0	0	0	0.301648
243	5.3737	1	0	0	0	0	0	0.328011
362	2.05687	0	0	0	0	0	0	0.283881
44	2.11075	0	0	0	0	1	0	0.293231
108	2.25661	0	0	0	0	1	0	0.286491
197	2.26361	0	0	0	0	1	0	0.288153
85	2.32527	0	0	0	0	1	0	0.299513
196	2.21859	0	0	0	0	1	0	0.288263
248	2.12821	0	0	0	0	1	0	0.310523
283	2.33816	0	0	0	0	1	0	0.31196
357	2.33744	0	0	0	0	1	0	0.318664
182	2.35207	0	0	0	0	0	0	0.293269
1	2.07996	0	0	0	0	0	0	0.379476
25	2.64008	0	0	0	0	0	0	0.273245
73	2.1689	0	0	0	0	0	0	0.283163
125	2.145	0	0	0	0	0	0	0.294406
210	1.92844	0	0	0	0	0	0	0.38018
236	1.87911	0	0	0	0	0	0	0.391258
252	2.19189	0	0	0	0	0	0	0.330427
311	2.31318	0	0	0	0	0	0	0.280148
352	2.20776	0	0	0	0	0	0	0.367501
56	2.18397	0	0	0	0	1	0	0.307645
98	4.58034	1	0	0	0	1	0	0.315276
139	2.19234	0	0	0	0	1	0	0.276632
194	2.43222	0	0	0	0	1	0	0.312463
244	2.14887	0	0	0	0	1	0	0.285088
309	2.4625	0	0	0	0	0	0	0.27318
359	2.22347	0	0	0	0	1	0	0.28481
12	2.14624	0	0	0	0	0	0	0.331793
23	1.84266	0	0	0	0	0	0	0.31359
68	2.72896	0	0	0	0	0	0	0.289334
104	2.92559	0	0	0	0	0	0	0.321715
113	2.22567	0	0	0	0	0	0	0.312256
181	3.05326	0	0	0	0	0	0	0.319841
221	2.72605	0	0	0	0	0	0	0.330987
235	1.72548	0	0	0	0	0	0	0.5
267	1.96103	0	0	0	0	0	0	0.336504
281	1.41668	0	0	0	0	0	0	0.5
351	2.54525	0	0	0	0	0	0	0.301875
216	2.26478	0	0	0	0	0	0	0.305567
202	2.51355	0	0	0	0	1	0	0.28131
266	2.25044	0	0	0	0	1	0	0.289137
306	2.88486	0	0	0	0	1	0	0.297496
346	2.27165	0	0	0	0	1	0	0.304849
38	2.13914	0	0	0	0	1	0	0.30613
90	3.28901	0	0	0	0	1	0	0.279479
141	2.21907	0	0	0	0	1	0	0.280176
323	2.65965	0	0	0	0	1	0	0.31276
335	1.84329	0	0	0	0	1	0	0.311555
360	2.30045	0	0	0	0	1	0	0.30749
89	2.3184	0	0	0	0	0	0	0.290627
151	2.32215	0	0	0	0	0	0	0.29663
313	2.27125	0	0	0	0	0	0	0.280194
79	2.22513	0	0	0	0	0	0	0.304712
148	2.21943	0	0	0	0	1	0	0.286453
166	2.29748	0	0	0	0	0	0	0.31106
189	2.16744	0	0	0	0	0	0	0.307725
247	2.08141	0	0	0	0	0	0	0.28743
273	2.20347	0	0	0	0	0	0	0.307773
305	2.13657	0	0	0	0	0	0	0.288512
87	2.20098	0	0	0	0	0	0	0.303806

## Sheet: N1
No.	pLD50	nArOCON	nRSR	F02[O-O]	F10[C-S]	F06[C-P]	B01[O-P]	nBridgeHead	T(P..Cl)
5	2.27476	0	0	1	0	0	0	0	0
117	4.67082	0	1	3	0	0	1	0	0
121	4.16368	0	0	0	0	0	1	0	0
123	4.15135	0	0	1	0	0	1	0	0
149	2.28005	0	0	1	0	0	0	0	0
159	4.60079	0	0	4	0	0	1	0	0
180	2.0449	0	0	1	0	0	0	0	0
191	2.23909	0	0	1	0	2	1	0	0
2	2.04344	0	0	1	0	0	0	0	0
11	2.17867	0	0	0	0	0	0	0	0
14	2.13001	0	0	0	0	0	0	0	0
37	2.11248	0	0	1	0	0	0	0	0
42	2.02873	1	0	1	0	0	0	0	0
43	3.66629	0	0	3	0	0	1	0	15
44	2.30719	0	0	3	0	0	1	0	15
49	1.98003	0	0	0	0	0	0	0	0
80	2.06653	0	0	0	0	0	0	0	0
147	2.64511	0	0	1	0	0	0	0	0
188	2.29149	0	0	1	0	0	0	0	0
208	2.10517	0	0	1	0	0	0	0	0
220	2.20417	0	0	0	0	0	0	0	0
222	2.02427	0	0	1	0	0	0	0	0
225	2.2624	0	0	6	0	1	1	0	22
231	1.86596	0	0	0	0	0	0	0	0
236	2.1791	0	0	1	0	0	0	0	0
237	2.12927	0	0	0	0	0	0	0	0
27	2.12608	0	0	1	0	0	0	0	0
41	1.7582	0	0	0	0	0	0	0	0
60	2.19934	0	0	0	0	0	0	0	0
65	2.2068	0	0	1	0	0	0	0	0
67	3.53658	0	0	0	0	0	0	0	0
71	2.99989	0	0	0	0	0	0	4	0
126	2.25399	0	0	0	0	0	0	2	0
142	3.46801	0	0	0	0	0	0	2	0
144	2.16259	0	0	0	0	0	0	0	0
173	1.96375	0	0	0	0	0	0	0	0
187	2.84562	0	0	0	0	0	0	0	0
194	1.98317	0	0	1	0	0	0	0	0
24	2.22443	0	0	2	0	0	0	0	0
28	2.65906	0	0	1	0	0	0	0	0
74	3.74025	0	0	1	0	0	1	0	0
77	3.94928	0	0	2	0	0	0	0	0
114	2.06489	0	0	0	0	0	0	0	0
152	4.65446	0	0	1	0	0	1	0	0
154	4.00876	0	1	1	0	0	0	0	0
170	2.02699	0	0	1	0	0	0	0	0
182	3.65991	0	0	3	0	1	1	0	0
190	5.62328	0	1	1	0	0	1	0	0
7	1.78413	0	0	0	0	0	0	0	0
18	2.13914	0	0	0	0	0	0	0	0
32	2.32437	0	0	2	0	0	0	0	0
45	1.85468	0	0	1	0	0	0	0	0
50	2.22513	0	0	1	0	0	0	0	0
54	1.95413	0	0	1	0	0	0	0	0
72	1.79337	0	0	0	0	0	0	0	0
98	2.15879	0	0	2	0	0	0	0	0
100	2.25744	0	0	2	0	0	0	0	0
104	1.95666	0	0	1	0	0	0	0	0
115	2.23168	0	0	0	0	0	0	0	0
116	2.26397	0	0	1	0	0	0	0	0
127	1.88874	0	0	0	0	0	0	0	0
129	2.148	0	0	0	0	0	0	0	0
135	2.26361	0	0	1	0	0	0	0	0
136	2.86519	1	0	2	0	0	0	0	0
143	2.0565	0	0	1	0	0	0	0	0
145	2.40754	0	0	0	0	0	0	0	0
166	2.46112	0	0	3	2	0	0	0	0
175	2.48243	0	0	0	0	0	0	0	0
176	2.39158	0	0	0	0	0	0	0	0
183	1.56975	0	0	0	0	0	0	0	0
205	2.16433	0	1	0	0	0	0	0	0
212	2.39872	0	0	1	1	0	0	0	0
232	2.27165	0	0	1	0	0	0	0	0
244	2.22347	0	0	0	0	0	0	0	0
245	2.10055	0	0	0	0	0	0	0	0
1	3.22623	0	0	2	0	0	0	0	0
16	2.17962	0	0	1	0	0	0	0	0
20	4.01169	0	0	4	0	0	0	2	0
51	4.08544	0	0	4	0	2	1	0	8
78	4.62289	0	1	1	0	1	1	0	0
139	2.16932	0	0	1	0	0	0	0	0
146	2.34731	0	0	3	0	2	1	0	0
164	3.07783	0	0	2	0	0	0	2	0
197	2.47774	0	0	1	0	0	0	0	0
200	1.87819	0	0	3	3	0	0	0	0
219	3.65118	0	1	1	1	0	1	0	0
223	3.76904	0	1	6	4	0	1	0	0
243	2.10087	0	0	1	0	0	0	0	0
4	1.92746	0	1	0	0	0	0	0	0
158	1.87911	0	0	0	0	0	0	0	0
185	2.0073	0	0	0	0	0	0	0	0
196	2.25368	0	0	0	0	0	0	0	0
238	1.84227	0	0	0	0	0	0	0	0
13	1.9538	0	0	0	0	0	0	0	0
21	3.36801	0	0	1	0	2	1	0	0
22	3.20782	0	0	1	0	0	0	0	0
30	2.18397	0	1	0	0	0	0	0	0
53	2.20098	0	0	1	0	0	0	0	0
55	1.94494	0	0	0	0	0	0	0	0
61	2.03696	0	0	1	0	0	0	0	0
82	2.42441	0	0	0	0	0	0	0	0
83	1.98522	0	1	0	1	0	0	0	0
84	4.2848	0	0	4	0	0	0	2	0
90	2.26109	0	0	2	0	0	0	0	0
95	2.25461	0	0	0	0	0	0	0	0
96	5.25671	0	1	3	0	0	1	0	0
99	2.00198	0	0	1	0	0	0	0	0
101	2.50637	0	0	1	0	0	0	0	0
102	2.32381	0	0	1	0	0	0	0	0
108	1.88468	0	0	1	0	0	0	0	0
109	2.03612	0	0	1	0	0	0	0	0
112	2.25498	0	0	1	0	0	0	0	0
120	2.28027	0	0	0	0	0	0	0	0
122	2.35459	0	0	1	0	0	0	0	0
130	2.29452	0	0	0	0	0	0	0	0
138	4.03322	0	0	2	0	1	1	0	0
140	2.22308	0	0	1	0	0	0	0	0
141	2.27809	0	0	2	0	0	0	0	0
162	2.18172	0	0	2	0	0	0	0	0
171	2.52511	0	0	0	0	0	0	0	0
177	3.49156	0	0	1	0	0	0	0	0
186	2.40557	0	0	1	0	0	0	0	0
193	3.9858	0	0	3	0	1	1	0	0
198	2.33816	0	0	2	0	0	0	0	0
206	2.20602	0	0	0	0	0	0	0	0
207	2.33039	0	0	1	0	0	0	0	0
209	2.27048	0	0	1	0	0	0	0	0
213	2.11559	0	1	0	2	0	0	0	0
215	2.52179	0	0	3	0	0	0	0	0
216	2.74797	0	0	3	0	0	0	0	0
218	2.32041	0	0	2	1	0	0	0	0
226	2.18853	0	0	2	1	0	0	0	0
230	2.03782	0	0	0	0	0	0	0	0
36	1.58677	0	1	0	0	0	0	0	0
92	2.27477	0	0	0	0	0	0	0	0
118	2.20863	0	0	0	0	0	0	0	0
156	2.23762	0	0	0	0	0	0	0	0
189	2.11827	0	0	0	0	0	0	0	0
211	2.25357	0	0	0	0	0	0	0	0
15	3.82189	0	0	2	0	0	0	0	0
34	2.00268	1	0	1	0	0	0	0	0
153	4.50158	1	1	1	0	0	0	0	0
195	4.14165	1	0	1	0	0	0	0	0
221	2.65965	0	0	0	0	0	0	0	0
242	4.13695	1	0	1	0	0	0	0	0
25	1.68715	0	0	1	0	0	0	0	0
40	1.51025	0	0	1	0	0	0	0	0
58	1.85248	0	0	1	0	0	0	0	0
69	2.01498	0	0	1	0	0	0	0	0
86	2.9101	0	0	2	0	0	0	2	0
150	2.95385	0	0	4	0	0	0	0	0
157	2.71411	0	0	1	0	0	0	0	0
124	2.42577	0	0	0	0	0	0	0	0
132	1.69504	0	0	0	0	0	0	0	0
167	1.92045	0	0	0	0	0	0	0	0
178	1.87883	0	0	0	0	0	0	0	0
235	2.35723	0	0	0	0	0	0	0	0
246	1.64181	0	0	0	0	0	0	0	0
6	1.96169	0	0	0	0	0	0	0	0
31	2.68091	0	1	0	0	0	0	0	0
33	2.17696	0	0	0	0	0	0	0	0
46	1.72146	0	0	0	0	0	0	0	0
64	2.39784	0	0	0	0	0	0	0	0
76	1.56295	0	0	0	0	0	0	0	0
81	2.10733	0	0	0	0	0	0	0	0
131	1.51096	0	0	0	0	0	0	0	0
19	2.03286	0	0	0	0	0	0	0	0
57	1.82101	0	0	0	0	0	0	0	0
107	2.05915	0	0	0	0	0	0	0	0
224	1.96158	0	0	0	0	0	0	0	0
8	2.89369	0	0	1	0	0	1	0	0
70	4.74779	0	0	6	0	2	1	0	0
91	2.2839	0	0	2	0	4	1	0	0
93	4.28413	0	0	1	0	0	1	0	0
163	4.685	0	0	7	0	1	1	0	0
168	4.67107	0	0	6	0	1	1	0	0
169	3.863	0	0	6	0	0	1	0	8
87	4.82953	0	0	0	0	0	0	4	0
184	5.51105	0	0	4	0	0	1	0	0
111	1.43718	0	0	2	0	0	0	0	0
10	3.4082	0	0	0	0	0	0	0	0
234	3.84483	0	0	3	0	0	1	0	9
No.	pLD50	nArOCON	nRSR	F02[O-O]	F10[C-S]	F06[C-P]	B01[O-P]	nBridgeHead	T(P..Cl)
119	1.78006	0	0	0	0	0	0	0	0
85	4.16235	0	0	3	0	0	0	2	0
165	2.35658	0	0	0	0	0	0	2	0
228	1.7798	0	0	3	0	1	1	0	8
35	2.28151	1	0	1	0	0	0	0	0
133	2.10587	0	0	1	0	0	0	0	0
181	2.33014	0	0	1	0	0	0	0	0
3	2.7013	0	0	1	0	0	0	0	0
38	2.15997	0	0	1	0	0	0	0	0
47	2.24274	0	0	1	0	0	0	0	0
117	2.10558	0	0	1	0	0	0	0	0
214	2.05338	0	0	0	0	0	0	0	0
239	2.10605	0	0	0	0	0	0	0	0
39	1.61713	0	0	0	0	0	0	0	0
66	1.9448	0	0	1	0	0	0	0	0
105	2.96681	0	0	0	0	0	0	0	0
229	4.12611	0	0	0	0	0	0	2	0
26	2.09925	0	0	0	0	0	0	0	0
174	1.44966	0	0	1	0	0	0	0	0
48	2.00455	0	0	0	0	0	0	0	0
75	2.28768	0	0	0	0	0	0	0	0
110	2.04534	0	0	2	0	0	0	0	0
128	2.36282	0	0	0	0	0	0	0	0
137	1.50019	0	0	0	0	0	0	0	0
172	2.21369	0	0	1	0	0	0	0	0
202	2.13467	0	0	1	0	0	0	0	0
241	2.33744	0	0	0	0	0	0	0	0
9	2.28393	0	0	1	0	0	0	0	0
62	4.55553	0	1	3	0	1	1	0	0
155	2.19107	0	0	1	0	0	0	0	0
201	3.15478	0	0	2	0	1	1	0	0
247	2.72562	0	0	1	0	0	0	0	0
94	2.21309	0	0	0	0	0	0	0	0
233	2.5577	0	0	0	0	0	1	0	0
17	2.13901	0	0	0	0	0	0	0	0
52	2.2986	0	0	1	0	0	0	0	0
63	4.93443	0	0	3	0	2	1	0	0
88	5.0211	0	0	2	0	0	1	0	0
97	2.18532	0	0	0	0	0	0	0	0
106	2.25781	0	0	1	0	0	0	0	0
113	2.25932	0	0	0	0	0	0	0	0
134	2.19479	0	0	1	0	0	0	0	0
148	2.40103	0	0	3	1	0	0	0	0
179	2.33561	0	0	1	0	0	0	0	0
204	2.58364	0	0	1	0	0	0	0	0
210	2.33395	0	0	2	1	0	0	0	0
217	1.86263	0	0	2	0	0	0	0	0
240	2.25891	0	0	1	0	0	0	0	0
78	1.76602	0	0	0	0	0	0	0	0
160	2.30562	0	0	0	0	0	0	0	0
23	4.85743	1	0	2	0	0	0	0	0
203	4.34573	1	0	1	0	0	0	0	0
29	2.59431	0	0	1	0	0	0	0	0
73	2.37836	0	0	2	0	0	0	0	0
161	1.53448	0	0	1	0	0	0	0	0
125	2.08675	0	0	0	0	0	0	0	0
227	1.93392	0	0	0	0	0	0	0	0
12	2.02181	0	0	0	0	0	0	0	0
59	3.04913	0	0	0	0	0	0	0	0
89	2.27729	0	0	0	0	0	0	0	0
56	2.65383	0	0	0	0	0	0	0	0
199	1.85356	0	0	0	0	0	0	0	0
68	4.45226	0	0	6	0	0	1	0	8
151	4.22129	0	0	1	0	0	1	0	0
192	4.89579	0	0	6	0	2	1	0	4
	2.57278

## Sheet: N2
No.	pLD50	nArOCON	nRSR	F02[O-O]	F06[C-P]	B06[C-N]	B01[O-P]	nBridgeHead	T(P..Cl)
5	2.27476	0	0	1	0	0	0	0	0
117	4.67082	0	1	3	0	0	1	0	0
121	4.16368	0	0	0	0	0	1	0	0
123	4.15135	0	0	1	0	0	1	0	0
149	2.28005	0	0	1	0	0	0	0	0
159	4.60079	0	0	4	0	0	1	0	0
180	2.0449	0	0	1	0	0	0	0	0
191	2.23909	0	0	1	2	0	1	0	0
2	2.04344	0	0	1	0	0	0	0	0
11	2.17867	0	0	0	0	0	0	0	0
14	2.13001	0	0	0	0	0	0	0	0
37	2.11248	0	0	1	0	0	0	0	0
42	2.02873	1	0	1	0	0	0	0	0
43	3.66629	0	0	3	0	1	1	0	15
44	2.30719	0	0	3	0	0	1	0	15
49	1.98003	0	0	0	0	0	0	0	0
80	2.06653	0	0	0	0	1	0	0	0
147	2.64511	0	0	1	0	0	0	0	0
188	2.29149	0	0	1	0	0	0	0	0
208	2.10517	0	0	1	0	0	0	0	0
220	2.20417	0	0	0	0	0	0	0	0
222	2.02427	0	0	1	0	0	0	0	0
225	2.2624	0	0	6	1	0	1	0	22
231	1.86596	0	0	0	0	1	0	0	0
236	2.1791	0	0	1	0	0	0	0	0
237	2.12927	0	0	0	0	0	0	0	0
27	2.12608	0	0	1	0	0	0	0	0
41	1.7582	0	0	0	0	0	0	0	0
60	2.19934	0	0	0	0	0	0	0	0
65	2.2068	0	0	1	0	0	0	0	0
67	3.53658	0	0	0	0	0	0	0	0
71	2.99989	0	0	0	0	0	0	4	0
126	2.25399	0	0	0	0	0	0	2	0
142	3.46801	0	0	0	0	0	0	2	0
144	2.16259	0	0	0	0	0	0	0	0
173	1.96375	0	0	0	0	0	0	0	0
187	2.84562	0	0	0	0	0	0	0	0
194	1.98317	0	0	1	0	0	0	0	0
24	2.22443	0	0	2	0	1	0	0	0
28	2.65906	0	0	1	0	1	0	0	0
74	3.74025	0	0	1	0	1	1	0	0
77	3.94928	0	0	2	0	1	0	0	0
114	2.06489	0	0	0	0	1	0	0	0
152	4.65446	0	0	1	0	1	1	0	0
154	4.00876	0	1	1	0	1	0	0	0
170	2.02699	0	0	1	0	0	0	0	0
182	3.65991	0	0	3	1	0	1	0	0
190	5.62328	0	1	1	0	0	1	0	0
7	1.78413	0	0	0	0	1	0	0	0
18	2.13914	0	0	0	0	1	0	0	0
32	2.32437	0	0	2	0	1	0	0	0
45	1.85468	0	0	1	0	1	0	0	0
50	2.22513	0	0	1	0	0	0	0	0
54	1.95413	0	0	1	0	1	0	0	0
72	1.79337	0	0	0	0	1	0	0	0
98	2.15879	0	0	2	0	1	0	0	0
100	2.25744	0	0	2	0	1	0	0	0
104	1.95666	0	0	1	0	1	0	0	0
115	2.23168	0	0	0	0	1	0	0	0
116	2.26397	0	0	1	0	1	0	0	0
127	1.88874	0	0	0	0	1	0	0	0
129	2.148	0	0	0	0	1	0	0	0
135	2.26361	0	0	1	0	1	0	0	0
136	2.86519	1	0	2	0	1	0	0	0
143	2.0565	0	0	1	0	1	0	0	0
145	2.40754	0	0	0	0	1	0	0	0
166	2.46112	0	0	3	0	1	0	0	0
175	2.48243	0	0	0	0	1	0	0	0
176	2.39158	0	0	0	0	1	0	0	0
183	1.56975	0	0	0	0	1	0	0	0
205	2.16433	0	1	0	0	1	0	0	0
212	2.39872	0	0	1	0	1	0	0	0
232	2.27165	0	0	1	0	1	0	0	0
244	2.22347	0	0	0	0	1	0	0	0
245	2.10055	0	0	0	0	1	0	0	0
1	3.22623	0	0	2	0	0	0	0	0
16	2.17962	0	0	1	0	0	0	0	0
20	4.01169	0	0	4	0	0	0	2	0
51	4.08544	0	0	4	2	0	1	0	8
78	4.62289	0	1	1	1	0	1	0	0
139	2.16932	0	0	1	0	1	0	0	0
146	2.34731	0	0	3	2	0	1	0	0
164	3.07783	0	0	2	0	0	0	2	0
197	2.47774	0	0	1	0	0	0	0	0
200	1.87819	0	0	3	0	0	0	0	0
219	3.65118	0	1	1	0	0	1	0	0
223	3.76904	0	1	6	0	0	1	0	0
243	2.10087	0	0	1	0	0	0	0	0
4	1.92746	0	1	0	0	0	0	0	0
158	1.87911	0	0	0	0	0	0	0	0
185	2.0073	0	0	0	0	0	0	0	0
196	2.25368	0	0	0	0	0	0	0	0
238	1.84227	0	0	0	0	0	0	0	0
13	1.9538	0	0	0	0	1	0	0	0
21	3.36801	0	0	1	2	1	1	0	0
22	3.20782	0	0	1	0	1	0	0	0
30	2.18397	0	1	0	0	1	0	0	0
53	2.20098	0	0	1	0	0	0	0	0
55	1.94494	0	0	0	0	1	0	0	0
61	2.03696	0	0	1	0	1	0	0	0
82	2.42441	0	0	0	0	1	0	0	0
83	1.98522	0	1	0	0	1	0	0	0
84	4.2848	0	0	4	0	1	0	2	0
90	2.26109	0	0	2	0	1	0	0	0
95	2.25461	0	0	0	0	1	0	0	0
96	5.25671	0	1	3	0	1	1	0	0
99	2.00198	0	0	1	0	1	0	0	0
101	2.50637	0	0	1	0	1	0	0	0
102	2.32381	0	0	1	0	1	0	0	0
108	1.88468	0	0	1	0	1	0	0	0
109	2.03612	0	0	1	0	1	0	0	0
112	2.25498	0	0	1	0	1	0	0	0
120	2.28027	0	0	0	0	1	0	0	0
122	2.35459	0	0	1	0	1	0	0	0
130	2.29452	0	0	0	0	1	0	0	0
138	4.03322	0	0	2	1	1	1	0	0
140	2.22308	0	0	1	0	1	0	0	0
141	2.27809	0	0	2	0	1	0	0	0
162	2.18172	0	0	2	0	1	0	0	0
171	2.52511	0	0	0	0	1	0	0	0
177	3.49156	0	0	1	0	1	0	0	0
186	2.40557	0	0	1	0	1	0	0	0
193	3.9858	0	0	3	1	1	1	0	0
198	2.33816	0	0	2	0	1	0	0	0
206	2.20602	0	0	0	0	1	0	0	0
207	2.33039	0	0	1	0	1	0	0	0
209	2.27048	0	0	1	0	1	0	0	0
213	2.11559	0	1	0	0	1	0	0	0
215	2.52179	0	0	3	0	1	0	0	0
216	2.74797	0	0	3	0	1	0	0	0
218	2.32041	0	0	2	0	1	0	0	0
226	2.18853	0	0	2	0	1	0	0	0
230	2.03782	0	0	0	0	1	0	0	0
36	1.58677	0	1	0	0	0	0	0	0
92	2.27477	0	0	0	0	0	0	0	0
118	2.20863	0	0	0	0	1	0	0	0
156	2.23762	0	0	0	0	0	0	0	0
189	2.11827	0	0	0	0	1	0	0	0
211	2.25357	0	0	0	0	0	0	0	0
15	3.82189	0	0	2	0	1	0	0	0
34	2.00268	1	0	1	0	1	0	0	0
153	4.50158	1	1	1	0	1	0	0	0
195	4.14165	1	0	1	0	1	0	0	0
221	2.65965	0	0	0	0	1	0	0	0
242	4.13695	1	0	1	0	1	0	0	0
25	1.68715	0	0	1	0	0	0	0	0
40	1.51025	0	0	1	0	0	0	0	0
58	1.85248	0	0	1	0	0	0	0	0
69	2.01498	0	0	1	0	0	0	0	0
86	2.9101	0	0	2	0	0	0	2	0
150	2.95385	0	0	4	0	0	0	0	0
157	2.71411	0	0	1	0	0	0	0	0
124	2.42577	0	0	0	0	0	0	0	0
132	1.69504	0	0	0	0	0	0	0	0
167	1.92045	0	0	0	0	0	0	0	0
178	1.87883	0	0	0	0	0	0	0	0
235	2.35723	0	0	0	0	0	0	0	0
246	1.64181	0	0	0	0	0	0	0	0
6	1.96169	0	0	0	0	0	0	0	0
31	2.68091	0	1	0	0	0	0	0	0
33	2.17696	0	0	0	0	0	0	0	0
46	1.72146	0	0	0	0	0	0	0	0
64	2.39784	0	0	0	0	0	0	0	0
76	1.56295	0	0	0	0	0	0	0	0
81	2.10733	0	0	0	0	0	0	0	0
131	1.51096	0	0	0	0	0	0	0	0
19	2.03286	0	0	0	0	1	0	0	0
57	1.82101	0	0	0	0	1	0	0	0
107	2.05915	0	0	0	0	1	0	0	0
224	1.96158	0	0	0	0	1	0	0	0
8	2.89369	0	0	1	0	0	1	0	0
70	4.74779	0	0	6	2	0	1	0	0
91	2.2839	0	0	2	4	0	1	0	0
93	4.28413	0	0	1	0	0	1	0	0
163	4.685	0	0	7	1	0	1	0	0
168	4.67107	0	0	6	1	0	1	0	0
169	3.863	0	0	6	0	0	1	0	8
87	4.82953	0	0	0	0	0	0	4	0
184	5.51105	0	0	4	0	0	1	0	0
111	1.43718	0	0	2	0	1	0	0	0
10	3.4082	0	0	0	0	1	0	0	0
234	3.84483	0	0	3	0	0	1	0	9
No.	pLD50	nArOCON	nRSR	F02[O-O]	F06[C-P]	B06[C-N]	B01[O-P]	nBridgeHead	T(P..Cl)
119	1.78006	0	0	0	0	1	0	0	0
85	4.16235	0	0	3	0	0	0	2	0
165	2.35658	0	0	0	0	0	0	2	0
228	1.7798	0	0	3	1	0	1	0	8
35	2.28151	1	0	1	0	0	0	0	0
133	2.10587	0	0	1	0	0	0	0	0
181	2.33014	0	0	1	0	0	0	0	0
3	2.7013	0	0	1	0	0	0	0	0
38	2.15997	0	0	1	0	0	0	0	0
47	2.24274	0	0	1	0	1	0	0	0
117	2.10558	0	0	1	0	1	0	0	0
214	2.05338	0	0	0	0	0	0	0	0
239	2.10605	0	0	0	0	0	0	0	0
39	1.61713	0	0	0	0	0	0	0	0
66	1.9448	0	0	1	0	0	0	0	0
105	2.96681	0	0	0	0	1	0	0	0
229	4.12611	0	0	0	0	0	0	2	0
26	2.09925	0	0	0	0	1	0	0	0
174	1.44966	0	0	1	0	0	0	0	0
48	2.00455	0	0	0	0	1	0	0	0
75	2.28768	0	0	0	0	1	0	0	0
110	2.04534	0	0	2	0	1	0	0	0
128	2.36282	0	0	0	0	1	0	0	0
137	1.50019	0	0	0	0	1	0	0	0
172	2.21369	0	0	1	0	1	0	0	0
202	2.13467	0	0	1	0	1	0	0	0
241	2.33744	0	0	0	0	1	0	0	0
9	2.28393	0	0	1	0	0	0	0	0
62	4.55553	0	1	3	1	0	1	0	0
155	2.19107	0	0	1	0	0	0	0	0
201	3.15478	0	0	2	1	0	1	0	0
247	2.72562	0	0	1	0	0	0	0	0
94	2.21309	0	0	0	0	0	0	0	0
233	2.5577	0	0	0	0	0	1	0	0
17	2.13901	0	0	0	0	1	0	0	0
52	2.2986	0	0	1	0	1	0	0	0
63	4.93443	0	0	3	2	1	1	0	0
88	5.0211	0	0	2	0	0	1	0	0
97	2.18532	0	0	0	0	1	0	0	0
106	2.25781	0	0	1	0	1	0	0	0
113	2.25932	0	0	0	0	1	0	0	0
134	2.19479	0	0	1	0	1	0	0	0
148	2.40103	0	0	3	0	1	0	0	0
179	2.33561	0	0	1	0	1	0	0	0
204	2.58364	0	0	1	0	1	0	0	0
210	2.33395	0	0	2	0	1	0	0	0
217	1.86263	0	0	2	0	1	0	0	0
240	2.25891	0	0	1	0	1	0	0	0
78	1.76602	0	0	0	0	0	0	0	0
160	2.30562	0	0	0	0	0	0	0	0
23	4.85743	1	0	2	0	1	0	0	0
203	4.34573	1	0	1	0	1	0	0	0
29	2.59431	0	0	1	0	0	0	0	0
73	2.37836	0	0	2	0	0	0	0	0
161	1.53448	0	0	1	0	0	0	0	0
125	2.08675	0	0	0	0	0	0	0	0
227	1.93392	0	0	0	0	1	0	0	0
12	2.02181	0	0	0	0	1	0	0	0
59	3.04913	0	0	0	0	0	0	0	0
89	2.27729	0	0	0	0	0	0	0	0
56	2.65383	0	0	0	0	1	0	0	0
199	1.85356	0	0	0	0	1	0	0	0
68	4.45226	0	0	6	0	0	1	0	8
151	4.22129	0	0	1	0	0	1	0	0
192	4.89579	0	0	6	2	0	1	0	4
	2.57278

[truncated: 11 more sheets: N3, N4, N5, S1, S2, S3, S4, S5, IS1, IS2, IS3]
