# Supplementary material for: Exploring regression-based QSTR and i-QSTR modeling for ecotoxicity prediction of diverse pesticides on multiple avian species
Source: Royal Society of Chemistry journal article supplement (doi:10.1039/d3va00163f), 2023-01-01
Supplement: d3va00163f2.pdf [file d3va00163f2.pdf]

# Exploring Regression-based QSTR and i-QSTR Modeling for Ecotoxicity Prediction of Diverse Pesticides on Multiple Avian Species

Trina Podder<sup>1</sup>, Ankur Kumar<sup>1</sup>, Arnab Bhattacharjee<sup>1</sup>, Probir Kumar Ojha<sup>1\*</sup>

<sup>1</sup>Drug Discovery and Development (DDD) Laboratory,

Department of Pharmaceutical Technology, Jadavpur University,

Kolkata 700032, India

\*Corresponding author: P K Ojha, Email: [probirojha@yahoo.co.in](mailto:probirojha@yahoo.co.in), Phone: +91 8777677004;

## Materials and methods

### Definition of different statistical parameters

$$R^2 = 1 - \frac{\Sigma(Y_{obs(train)} - Y_{calc(train)})^2}{\Sigma(Y_{obs(train)} - \bar{Y}_{train})^2}$$

$$R_{adj}^2 = \frac{(n-1) \times R^2 - p}{(n-p-1)}$$

$$RMSE_c = \sqrt{\frac{(\Sigma Y_{obs(train)} - Y_{calc(train)})^2}{n}}$$

$$Q_{Loo}^2 = 1 - \frac{\Sigma(Y_{obs(train)} - Y_{calc(train)})^2}{\Sigma(Y_{obs(train)} - \bar{Y}_{train})^2}$$

Where,  $R^2$  = Co-efficient of determination

$R_{adj}^2$  = Adjusted co-efficient of determination

$Q_{Loo}^2$  = Cross-validated correlation coefficient

$Y_{obs(train)}$  = Observed response value of training set

$Y_{calc(train)}$  = Calculated response value of training set

$\bar{Y}_{train}$  = Average of all response of training set

$RMSE_c$  = Root mean square errors of calibration

$n$  = Number of compounds

$p$  = Number of descriptors

$$Q_{F1}^2 = 1 - \frac{\sum (Y_{obs(test)} - Y_{calc(test)})^2}{\sum (Y_{obs(test)} - \bar{Y}_{train})^2}$$

$$Q_{F2}^2 = 1 - \frac{\sum (Y_{obs(test)} - Y_{calc(test)})^2}{\sum (Y_{obs(test)} - \bar{Y}_{test})^2}$$

$$r_m^2 = r^2 \times \left(1 - \sqrt{(r^2 - r_0^2)}\right)$$

$$r_m'^2 = r^2 \times \left(1 - \sqrt{(r^2 - r_0'^2)}\right)$$

$$\bar{r}_m^2 = \frac{(r_m^2 + r_m'^2)}{2}$$

$$\Delta r_m^2 = |r_m^2 - r_m'^2|$$

Where,  $Y_{obs(test)}$  = Observed response value of training set

$Y_{calc(test)}$  = Calculated response value of training set

$\bar{Y}_{train}$  = Average of all response of training set

$\bar{Y}_{test}$  = Average of all response of test set

### Applicability domain: Standardization technique

The equation to calculate AD is:

$$S_{ki} = \frac{|X_{ki} - \bar{X}_i|}{\sigma X_i}$$

Where,  $k=1, 2, 3 \dots nComp$  (here,  $nComp$  = total number of compounds)

$i=1, 2, 3 \dots nDes$  (here,  $nDes$  = total number of descriptors)

$S_{ki}$  = Standardized descriptor  $i$  for compound  $k$  (from the training or test set)

$X_{ki}$  = original descriptor  $i$  for compound  $k$  (from the training or test set)

$\bar{X}_{ki}$  = mean value of the descriptor

$X_i$  = for the training set compounds only

$\sigma X_i$  = standard deviation of the descriptor

$X_i$  for the training set compounds only

The standardization approach of applicability domain is based on the ideal data distribution; 99.7% of the compounds would stay within the range of mean  $\pm 3$  standard deviations (SDs). As a result, this range (i.e., mean  $\pm 3$ SDs) is considered as the area of the majority of the training set compounds. Outside this area, a compound is examined as a diverse from the rest of the compounds. So, one should compute the maximum  $S_i(k)$  value ( $[S_i]_{\max(k)}$ ) for the compound  $k$ . If the SD value for descriptor  $i$  of compound  $k$  ( $S_{ki}$ ) is greater than 3 then the compound is an X-outlier (if it is in the training set) or outside the AD (if it is in the test set).

## Results and discussion

\*Here, S denotes supporting information and number denotes to corresponding table.

## Results and discussion

**Table S1.** Mechanistic interpretation and definition of descriptors related to **electronegativity**: BQ (Bobwhite quail) oral pLD<sub>50</sub>

| Sl no | Descriptors       | Class                   | Definition of descriptors                                        | Contribution | Fragments                                                                                                     | Mechanistic interpretation                              |
|-------|-------------------|-------------------------|------------------------------------------------------------------|--------------|---------------------------------------------------------------------------------------------------------------|---------------------------------------------------------|
| 1     | <b>P-117</b>      | Atom-centered fragments | Presence of phosphate group                                      | Positive     | X3-P=X<br>(X=O)                                                                                               | Presence of phosphate group makes pesticides more toxic |
| 2     | <b>nCXr</b>       | Functional group count  | Number of electro-negative atom (X) on ring C (sp <sup>3</sup> ) | Positive     | 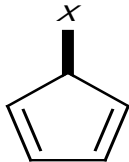<br>(X= Cl, O, S, F etc.) | Presence of this fragment makes pesticides more toxic   |
| 3     | <b>F04[Br-Br]</b> | 2D atom pair            | Frequency of Br-Br at topological distance 4                     | Positive     |                          | Presence of bromine atoms make pesticides more toxic    |

|   |                  |              |                                             |          |                                                                                     |                                                       |
|---|------------------|--------------|---------------------------------------------|----------|-------------------------------------------------------------------------------------|-------------------------------------------------------|
| 4 | <b>F06[S-Cl]</b> | 2D atom pair | Frequency of S-Cl at topological distance 6 | Positive | 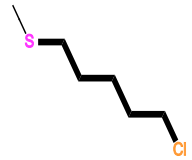 | Presence of this fragment makes pesticides more toxic |
| 5 | <b>F02[O-O]</b>  | 2D atom pair | Frequency of O-O at topological distance 2  | Positive |  | Presence of oxygen atoms make pesticides more toxic   |

**Table S2.** Mechanistic interpretation and definition of descriptors related to **hydrophilicity**: BQ (Bobwhite quail) oral pLD<sub>50</sub>

| Sl no | Descriptors      | Class        | Definition of descriptors                           | Contribution | Fragments                                                                             | Mechanistic interpretation                                            |
|-------|------------------|--------------|-----------------------------------------------------|--------------|---------------------------------------------------------------------------------------|-----------------------------------------------------------------------|
| 1     | <b>B02 [N-N]</b> | 2D atom pair | Presence/absence of N - N at topological distance 2 | Negative     | 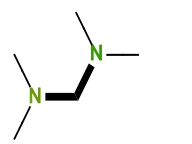 | Attachment of this fragment in ring system makes pesticides non-toxic |

|   |                 |              |                                            |          |                                                                                     |                                                      |
|---|-----------------|--------------|--------------------------------------------|----------|-------------------------------------------------------------------------------------|------------------------------------------------------|
| 2 | <b>F05[S-P]</b> | 2D atom pair | Frequency of S-P at topological distance 5 | Negative | 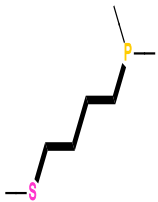 | Presence of this fragment makes pesticides non-toxic |
| 3 | <b>F09[C-P]</b> | 2D atom pair | Frequency of C-P at topological distance 9 | Negative |  | Presence of this fragment makes pesticides non-toxic |

**Table S3.** Mechanistic interpretation and definition of descriptors related to **hydrophobicity**: BQ (Bobwhite quail) oral pLD<sub>50</sub>

| Sl no | Descriptors     | Class                     | Definition of descriptors                                            | Contribution | Fragments       | Mechanistic interpretation                                         |
|-------|-----------------|---------------------------|----------------------------------------------------------------------|--------------|-----------------|--------------------------------------------------------------------|
| 1     | <b>X2A</b>      | Connectivity indices      | Average connectivity index of order 2                                | Negative     | Size & Shape    | Increasing value of this descriptor makes the pesticides non-toxic |
| 2     | <b>minssCH2</b> | Minimum atom-type E-state | Presence of methylene ( $-\text{CH}_2-$ ) groups in aliphatic chains | Negative     | $-\text{CH}_2-$ | Increasing value of this descriptor makes the pesticides non-toxic |
| 3     | <b>X4v</b>      | Connectivity indices      | Valence connectivity index of order                                  | Positive     | Size & Shape    | Increasing value of this descriptor makes the pesticides toxic     |

**Table S4.** Mechanistic interpretation and definition of descriptors related to **electronegativity**: MD (Mallard duck) oral pLD<sub>50</sub>

| Sl no | Descriptors     | Class                  | Definition of descriptors                         | Contribution | Fragments                                                                             | Mechanistic interpretation                            |
|-------|-----------------|------------------------|---------------------------------------------------|--------------|---------------------------------------------------------------------------------------|-------------------------------------------------------|
| 1     | <b>nRSR</b>     | Functional group count | Number of sulfide groups present in a compound    | Positive     | Number of Sulfur                                                                      | Presence of sulfide group makes pesticides more toxic |
| 2     | <b>F02[O-O]</b> | 2D atom pair           | Frequency of O-O at topological distance 2        | Positive     | 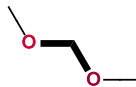   | Presence of this fragment makes pesticides more toxic |
| 3     | <b>B01[O-P]</b> | 2D atom pair           | Presence/Absence of O-P at topological distance 1 | Positive     |  | Presence of this group make pesticides more toxic     |



|   |                 |              |                                                             |          |                                                                                     |                                                          |
|---|-----------------|--------------|-------------------------------------------------------------|----------|-------------------------------------------------------------------------------------|----------------------------------------------------------|
| 4 | <b>B05[O-S]</b> | 2D atom pair | Presence/<br>Absence of O-S<br>at topological<br>distance 5 | Positive | 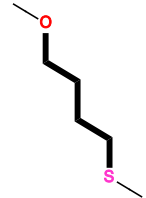 | Presence of this fragment makes pesticides<br>more toxic |
|---|-----------------|--------------|-------------------------------------------------------------|----------|-------------------------------------------------------------------------------------|----------------------------------------------------------|

**Table S5.** Mechanistic interpretation and definition of descriptors related to **hydrophilicity**: MD (Mallard duck) oral pLD<sub>50</sub>

| Sl<br>no | Descriptors | Class | Definition<br>of<br>descriptors | Contribution | Fragments | Mechanistic interpretation |
|----------|-------------|-------|---------------------------------|--------------|-----------|----------------------------|
|----------|-------------|-------|---------------------------------|--------------|-----------|----------------------------|

|   |                 |              |                                             |          |                                                                                      |                                                                       |
|---|-----------------|--------------|---------------------------------------------|----------|--------------------------------------------------------------------------------------|-----------------------------------------------------------------------|
| 1 | <b>F10[C-S]</b> | 2D atom pair | Frequency of C-S at topological distance 10 | Negative | 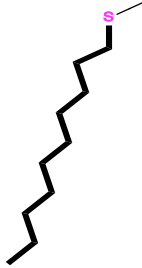  | Attachment of this fragment in ring system makes pesticides non-toxic |
| 2 | <b>F08[C-S]</b> | 2D atom pair | Frequency of C-S at topological distance 8  | Negative |   | Presence of this fragment makes pesticides non-toxic                  |
| 3 | <b>F06[C-P]</b> | 2D atom pair | Frequency of C-P at topological distance 6  | Negative |  | Presence of this fragment makes pesticides non-toxic                  |

**Table S6.** Mechanistic interpretation and Definition of descriptors related to  $\pi$ - $\pi$  Electronegativity: MD (Mallard duck) oral pLD<sub>50</sub> oral pLD<sub>50</sub>

| Sl no | Descriptors     | Class        | Definition of descriptors                                    | Contribution | Fragments                                                                           | Mechanistic interpretation                                          |
|-------|-----------------|--------------|--------------------------------------------------------------|--------------|-------------------------------------------------------------------------------------|---------------------------------------------------------------------|
| 1     | <b>T(P..Cl)</b> | 2D atom pair | Sum of topological distances between phosphorus and chlorine | Negative     | 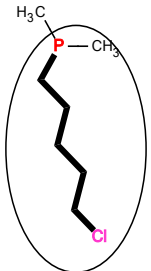 | Attachment of this fragment in structure makes pesticides non-toxic |

**Table S7.** Mechanistic interpretation and definition of descriptors related to **lipophilicity**: MD (Mallard duck) oral pLD<sub>50</sub>

| Sl no | Descriptors         | Class           | Definition of descriptors                                   | Contribution | Fragments                                                  | Mechanistic interpretation                         |
|-------|---------------------|-----------------|-------------------------------------------------------------|--------------|------------------------------------------------------------|----------------------------------------------------|
| 1     | <b>nBridge-Head</b> | Ring-descriptor | How many bridgehead atoms are present in the ring structure | Positive     | Hetero-atoms like -PO <sub>4</sub> , -SO <sub>4</sub> etc. | Presence of this group makes pesticides more toxic |

|   |                |                        |                                                              |          |                                                                                     |                                                       |
|---|----------------|------------------------|--------------------------------------------------------------|----------|-------------------------------------------------------------------------------------|-------------------------------------------------------|
|   |                |                        |                                                              |          |                                                                                     |                                                       |
| 2 | <b>nArOCON</b> | Functional group count | How many aromatic (thio-) carbamate groups are in a compound | Positive | 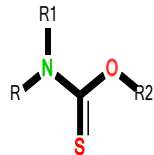 | Presence of this fragment makes pesticides more toxic |

**Table S8.** Mechanistic interpretation and definition of descriptors related to **electronegativity**: ZF (Zebra finch) oral pLD<sub>50</sub>

| Sl no | Descriptors     | Class                  | Definition of descriptors                      | Contribution | Fragments                                                                             | Mechanistic interpretation                         |
|-------|-----------------|------------------------|------------------------------------------------|--------------|---------------------------------------------------------------------------------------|----------------------------------------------------|
| 1     | <b>F01[O-P]</b> | 2D atom pair           | Frequency of O-P at topological distance 1     | Positive     | 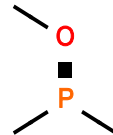 | Presence of this group makes pesticides more toxic |
| 2     | <b>nRSR</b>     | Functional group count | Number of sulfide groups present in a compound | Positive     | Number of sulfur                                                                      | Presence of sulfur makes pesticides more toxic     |

|   |              |                        |                                                                          |          |                                  |                                                   |
|---|--------------|------------------------|--------------------------------------------------------------------------|----------|----------------------------------|---------------------------------------------------|
|   |              |                        |                                                                          |          |                                  |                                                   |
| 3 | <b>c-031</b> | Atom centered fragment | Two electro-negative atoms attached with carbon along with another group | Positive | X--CR—<br>X(X=Cl,Br,F, O,S etc.) | Presence of this group make pesticides more toxic |

**Table S9.** Mechanistic interpretation and definition of descriptors related to **hydrophilicity**: ZF (Zebra finch) oral pLD<sub>50</sub>

| Sl no | Descriptors | Class | Definition of descriptors | Contribution | Fragments | Mechanistic interpretation |
|-------|-------------|-------|---------------------------|--------------|-----------|----------------------------|
|-------|-------------|-------|---------------------------|--------------|-----------|----------------------------|

|   |                 |              |                                                                       |          |                                                                                      |                                                                       |
|---|-----------------|--------------|-----------------------------------------------------------------------|----------|--------------------------------------------------------------------------------------|-----------------------------------------------------------------------|
| 1 | <b>F04[O-S]</b> | 2D atom pair | Frequency of the O-S fragment in a compound at topological distance 4 | Negative | 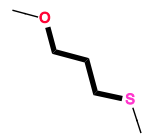  | Attachment of this fragment in ring system makes pesticides non-toxic |
| 2 | <b>B04[C-C]</b> | 2D atom pair | Presence/absence of C-C at topological distance 4                     | Negative |   | Presence of this fragment makes pesticides non-toxic                  |
| 3 | <b>F06[C-S]</b> | 2D atom pair | Frequency of C-S at topological distance 6                            | Negative |   | Presence of this fragment makes pesticides non-toxic                  |
| 4 | <b>F05[C-S]</b> | 2D atom pair | Frequency of C-S at topological distance 5                            | Negative |  | Presence of this fragment makes pesticides non-toxic                  |

**Table S10.** Mechanistic interpretation and definition of descriptors related to  $\pi$ - $\pi$  electronegativity: ZF (Zebra finch) oral pLD<sub>50</sub>

| Sl no | Descriptors       | Class        | Definition of descriptors                               | Contribution | Fragments                                                                           | Mechanistic interpretation                                |
|-------|-------------------|--------------|---------------------------------------------------------|--------------|-------------------------------------------------------------------------------------|-----------------------------------------------------------|
| 1     | <b>T(O..Br)</b>   | 2D atom pair | Sum of topological distances between oxygen and bromine | Negative     | 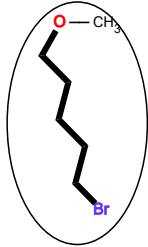 | Presence of this group makes pesticides non-toxic         |
| 2     | <b>B04[Cl-Cl]</b> | 2D atom pair | Presence/absence of Cl-Cl at topological distance 4     | Negative     |  | Presence of this fragment makes pesticides more non-toxic |
